# Supplementary material for: Multiplexed measurement of variant abundance and activity reveals VKOR topology, active site and human variant impact
Source: eLife. 2020 Sep 1;9:e58026. doi: 10.7554/eLife.58026 (PMC7462613; doi:10.7554/eLife.58026)
Supplement: Figure 1—source data 2. — Flow cytometry for monoclonal validation of variants. 11 variants were run individually, values show mean and error for VAMP-seq score and eGFP:mcherry intensity. [file elife-58026-fig1-data2.csv]

variant	score	score_se	mean_ratio	se
Y119P	-0.057613275	0.05068784	0.1127823333	0.0296275632
N142L	0.141842621	0.04920613	0.280537	0.05123739356
L76Q	0.210208809	0.0467998	0.3182196667	0.05930797075
D44G	0.396561909	0.07255783	0.419226	0.06308865192
C16N	0.483223321	0.0424531782	0.5909266667	0.05684455693
R151H	0.78423287	0.058254125	0.9937083333	0.1087018076
S81L	0.863970301	0.04655038	0.873333	0.1023883313
R33P	1.187686	0.04201453	1.057869667	0.1020374339
K30G	1.300568	0.01771653	1.596814	0.143617821
WT	0.9531325	0.1401239	1.094449667	0.1238255983
R98W	0.4475842	0.1158077	0.4093383333	0.08333797605
