# Supplementary material for: Multiplexed measurement of variant abundance and activity reveals VKOR topology, active site and human variant impact
Source: eLife. 2020 Sep 1;9:e58026. doi: 10.7554/eLife.58026 (PMC7462613; doi:10.7554/eLife.58026)
Supplement: Figure 3—source data 2. — Evolutionary couplings 3D contact predictions. Rows show pairs of residues with contact probabilities. [file elife-58026-fig3-data2.csv]

indices	seq	alpha	beta	alpha_call	beta_call
9	G			False	False
10	W			False	False
11	V		0.7326090589469266	False	False
12	R		0.4074128856593024	False	False
13	L	0.7038655825250727	0.6342816688761734	False	False
14	A	0.8629567483442737	0.8380273723508589	False	False
15	L	0.6703237544405117	0.06826220800823402	True	False
16	C	0.8508523725442201	0.5806988156730409	True	False
17	L	3.042751546026812	0.03265082427550147	True	False
18	T	1.7599531854412311	-0.7605625630715197	True	False
19	G	0.8682648442786005	0.7177573643119547	True	False
20	L	2.4248214414666003	-0.31465250477446377	True	False
21	V	6.053324648104451	-0.2734570926479686	True	False
22	L	1.8652659089001606	-0.6854759657997306	True	False
23	S	0.808348934793188	-0.5310469549044047	True	False
24	L	4.165336168472105	-0.04014512412432991	True	False
25	Y	3.3521239689816076	-0.07687155400770429	True	False
26	A	0.5716241618316124	-1.0988199514688997	True	False
27	L	3.135393286804358	-0.8030588425451549	True	False
28	H	5.036793087630657	-0.8661921200354017	True	False
29	V	2.3308432800800793	-0.783085399522954	True	False
30	K	0.2324259405010984	-1.4996679438218272	True	False
31	A	5.396495707023857	-1.5287705137277592	True	False
32	A	6.024724275334043	-0.20785885403114338	True	False
33	R	0.8669733101637968	-0.1580621358841613	True	False
34	A	0.16206885849583597	0.5306713300919118	False	False
35	R	2.3299408134479593	-0.9377557538060894	False	False
36	D	-0.49934110602085746	-0.029283131303095653	False	True
37	R	-2.3046774411897624	-1.8599599277973917	False	True
38	D	-4.599655992942161	1.8131821090485953	False	True
39	Y	-2.57352315417179	1.4928102988508125	False	True
40	R	-1.0051355937566122	-0.5837885470356019	False	True
41	A	-3.015476285955323	2.5851326699214896	False	False
42	L	0.9849354469677909	0.4972365264638971	False	False
43	C	-0.06773202024536867	0.6246549399287097	False	False
44	D	1.730459033772905	1.11455634435198	False	False
45	V	-1.4152499033381711	-0.24594588755410277	False	False
46	G	-1.8071826259173933	1.6449090245291924	False	False
47	T	-1.6682192164629683	-0.8765893594920822	True	False
48	A	-2.9672839486020255	-0.5136340385533619	True	False
49	I	2.481945273782506	-0.772341000786847	True	False
50	S	2.4423946372725065	0.9691975944194967	True	False
51	C	0.4738025783900791	-0.40133313996323544	True	False
52	S	0.39243124676621444	0.1699336595243823	False	False
53	R	0.8297237060374922	-1.4827332684636327	False	False
54	V	2.077104728294818	-0.5951716419525968	False	False
55	F	-1.5447984039267024	-0.1888888053953719	False	False
56	S	-0.7193055695303382	0.41217736217671735	False	False
57	S	0.0449303193158568	0.3995386529718588	False	False
58	R	-3.0182016814125694	0.4312762445878611	False	False
59	W	-3.6357212117223114	-0.6475136959693253	False	False
60	G	0.10530256684957304	0.7259674038785942	False	False
61	R	0.35181118517355897	-0.7319223608354433	False	False
62	G		-1.0956503462964404	False	False
63	F		-1.0754234686096258	False	False
64	G			False	False
65	L			False	False
79	S			False	False
80	N			False	False
81	S		-0.48904896001608267	False	False
82	I		-1.6688219758514788	False	False
83	F	1.3330809633714087	0.6423218294476309	False	False
84	G	2.0475895104683515	-0.5374331590517124	False	False
85	C	-0.7435317203086662	-0.5017613627666204	False	False
86	I	2.6546237624462883	-2.5104816090812827	False	False
87	F	0.4010913867496503	0.39231343569066507	True	False
88	Y	-1.5676377436972813	-0.46232244810463974	True	False
89	T	3.9483023553993983	1.0469164144367098	True	False
90	L	2.6993203275289153	-0.8207177233934227	True	False
91	Q	0.03482847854775409	0.4515861770108381	True	False
92	L	1.574772185834569	0.03694488062074594	True	False
93	L	5.018079439733325	-0.20327500152755074	True	False
94	L	3.922776088749932	-0.17618853775329937	True	False
95	G	0.15686694364938253	-0.16673916423007135	True	False
96	C	1.8620559265276633	0.29680824730797495	False	False
97	L	-2.0354276543729544	-0.5809567775220815	False	False
98	R	-1.502260735829236	-2.776247935851938	False	False
99	T	-2.4438343377795215	2.2828985952080783	False	False
100	R	1.3106442836707461	-0.5562879805120572	True	False
101	W	-0.5752358821457249	1.2035613975767718	True	False
102	A	1.7356257769971093	0.045674175091712205	True	False
103	S	2.2966376017341097	-0.40805058623531604	True	False
104	V	5.068819884539822	-0.11545094231839317	True	False
105	L	2.8630392468634542	-2.405687708998378	True	False
106	M	0.38874343163319447	-2.023309170141202	True	False
107	L	6.475674948714517	-2.114916897310155	True	False
108	L	4.492445517052286	-1.445236678724331	True	False
109	S	3.405754419983007	-1.5088240897938079	True	False
110	S	1.163245986285914	-0.6112650562388559	True	False
111	L	6.2185249455350196	-1.4032456969017886	True	False
112	V	4.190021002650548	0.4786229857747031	True	False
113	S	0.8561496557662319	0.05345414466107738	True	False
114	L	4.805897072787763	-0.5799569335002034	True	False
115	A	4.442766410943384	-0.3670043770832839	True	False
116	G	5.398942044232148	-0.6434895549932768	True	False
117	S	2.5689409371509155	-0.48911461358277913	True	False
118	V	9.101054551428117	-1.1982878977170686	True	False
119	Y	6.567210403151935	0.20036405324904505	True	False
120	L	2.95662708651477	-0.511144725808197	True	False
121	A	8.537319234864206	-0.5053601738264623	True	False
122	W	4.429192246010647	-2.5933779689286696	True	False
123	I	6.548194661528515	-1.0038244939967416	True	False
124	L	2.5985978694608383	-0.5765265737757235	True	False
125	F	3.5151778315776463	-0.1805933191362065	True	False
126	F	2.068000568991415	-1.3540022971214922	True	False
127	V	3.112648554133757	-0.6257258851665958	True	False
128	L	-4.265084110511513	1.1258345438422412	True	False
129	Y	1.065377220084051	-0.2705942277017148	False	False
130	D	-1.5928272448169123	2.296017160915579	False	False
131	F	-1.3007323109053854	0.2702385713416963	True	False
132	C	1.259778762322744	0.32184970110086814	True	False
133	I	4.004086085237387	-0.09409724654909242	True	False
134	V	1.5409839070077052	0.10372040008534165	True	False
135	C	1.6498706091951578	-0.15476741010419368	True	False
136	I	4.302169373812408	0.4735104357746439	True	False
137	T	4.721207148951342	0.5209199877318752	True	False
138	T	1.601796183089784	-0.8194484211039572	True	False
139	Y	2.731078478986111	-0.25069263729542646	True	False
140	A	4.662199390524409	-0.6794679161779295	True	False
141	I	1.714834002380816	-0.05750051455098121	True	False
142	N	1.626171835814716	-1.4756676234755906	True	False
143	V	1.732645891198734	-1.5155740779434395	True	False
144	S	3.175426644909254	-0.888398767406826	True	False
145	L	3.1494132119448968	-0.7273080265423726	True	False
146	M	2.620900814920439	0.4098293313986835	True	False
147	W	1.9495540799971611	-0.8831353175208516	True	False
148	L		-0.7544506511978545	True	False
149	S		-0.08035618359032036	False	False
150	F			False	False
