# Supplementary material for: Multiplexed measurement of variant abundance and activity reveals VKOR topology, active site and human variant impact
Source: eLife. 2020 Sep 1;9:e58026. doi: 10.7554/eLife.58026 (PMC7462613; doi:10.7554/eLife.58026)
Supplement: Figure 3—source data 3. — Insertion energies from Elazar et al., 2016b. Amino acids with calculated insertion energy. [file elife-58026-fig3-data3.csv]

i	A_i	j	A_j	cn	segment_i	segment_j	probability	positions
94	L	102	A	0.8303940000000001	A	A	1.0	(94, 102)
107	L	150	F	0.783319	A	A	1.0	(107, 150)
27	L	82	I	0.740476	A	A	1.0	(27, 82)
44	D	50	S	0.608557	A	A	0.9999999999996492	(44, 50)
19	G	141	I	0.602901	A	A	0.9999999999993868	(19, 141)
12	R	145	L	0.597878	A	A	0.9999999999989974	(12, 145)
107	L	111	L	0.585121	A	A	0.9999999999965694	(107, 111)
122	W	127	V	0.58431	A	A	0.9999999999962936	(122, 127)
97	L	98	R	0.5774779999999999	A	A	0.9999999999929226	(97, 98)
30	K	61	R	0.5665100000000001	A	A	0.9999999999803248	(30, 61)
39	Y	41	A	0.5659420000000001	A	A	0.999999999979266	(39, 41)
119	Y	123	I	0.559469	A	A	0.9999999999624616	(119, 123)
110	S	145	L	0.559469	A	A	0.9999999999624616	(110, 145)
111	L	146	M	0.544638	A	A	0.9999999998574588	(111, 146)
18	T	141	I	0.504173	A	A	0.9999999954691094	(18, 141)
123	I	127	V	0.49499	A	A	0.9999999904242538	(123, 127)
88	Y	138	T	0.489295	A	A	0.9999999848719259	(88, 138)
110	S	149	S	0.484699	A	A	0.9999999782011666	(110, 149)
13	L	92	L	0.47079	A	A	0.9999999354786686	(13, 92)
114	L	146	M	0.463555	A	A	0.9999998879003024	(114, 146)
125	F	131	F	0.450128	A	A	0.9999996942327786	(125, 131)
15	L	141	I	0.4491729999999999	A	A	0.9999996719638332	(15, 141)
22	L	137	T	0.448122	A	A	0.9999996456352364	(22, 137)
15	L	145	L	0.442571	A	A	0.99999946874314	(15, 145)
27	L	31	A	0.44191	A	A	0.999999442677022	(27, 31)
114	L	118	V	0.427515	A	A	0.9999984444064411	(114, 118)
113	S	142	N	0.412937	A	A	0.9999957403690578	(113, 142)
121	A	125	F	0.411654	A	A	0.9999953526338252	(121, 125)
105	L	106	M	0.40634	A	A	0.9999933507428872	(105, 106)
128	L	130	D	0.401917	A	A	0.9999910698195608	(128, 130)
131	F	136	I	0.401364	A	A	0.99999073626871	(131, 136)
20	L	85	C	0.398324	A	A	0.999988676443045	(20, 85)
112	V	115	A	0.393943	A	A	0.9999849130394884	(112, 115)
54	V	60	G	0.393062	A	A	0.999984022310109	(54, 60)
16	C	92	L	0.391735	A	A	0.9999825841553486	(16, 92)
91	Q	145	L	0.391559	A	A	0.9999823842742632	(91, 145)
36	D	37	R	0.39139	A	A	0.9999821902603532	(36, 37)
58	R	59	W	0.390017	A	A	0.9999805357501924	(58, 59)
42	L	134	V	0.389137	A	A	0.9999793983508608	(42, 134)
114	L	143	V	0.387704	A	A	0.9999774076927274	(114, 143)
17	L	21	V	0.376438	A	A	0.9999538266044812	(17, 21)
97	L	99	T	0.371568	A	A	0.9999374637413522	(97, 99)
63	F	64	G	0.371504	A	A	0.9999372153589712	(63, 64)
118	V	121	A	0.367223	A	A	0.9999182599966282	(118, 121)
36	D	38	D	0.35766	A	A	0.9998540015395404	(36, 38)
87	F	113	S	0.353647	A	A	0.9998144691993645	(87, 113)
123	I	128	L	0.34891500000000003	A	A	0.9997545887138916	(123, 128)
136	I	139	Y	0.342396	A	A	0.9996410102228208	(136, 139)
44	D	52	S	0.33870500000000003	A	A	0.9995558719309144	(44, 52)
104	V	108	L	0.338391	A	A	0.999547795799444	(104, 108)
116	G	120	L	0.334976	A	A	0.9994503514455806	(116, 120)
32	A	35	R	0.334313	A	A	0.9994292300939308	(32, 35)
140	A	144	S	0.333672	A	A	0.9994080709097252	(140, 144)
47	T	48	A	0.330237	A	A	0.9992812379993736	(47, 48)
41	A	44	D	0.329424	A	A	0.9992476106042386	(41, 44)
53	R	130	D	0.327039	A	A	0.99914003595377	(53, 130)
15	L	144	S	0.32602800000000004	A	A	0.9990901172450276	(15, 144)
41	A	134	V	0.324743	A	A	0.9990226527927618	(41, 134)
11	V	148	L	0.319171	A	A	0.9986705368812576	(11, 148)
13	L	95	G	0.317913	A	A	0.9985756836821726	(13, 95)
147	W	148	L	0.317265	A	A	0.998524329568626	(147, 148)
62	G	63	F	0.31473	A	A	0.9983058760065142	(62, 63)
20	L	89	T	0.31242800000000004	A	A	0.9980809602219678	(20, 89)
29	V	39	Y	0.308765	A	A	0.9976631380711232	(29, 39)
122	W	123	I	0.306171	A	A	0.9973160541991559	(122, 123)
30	K	31	A	0.306076	A	A	0.9973024510166738	(30, 31)
32	A	39	Y	0.305575	A	A	0.997229614923586	(32, 39)
22	L	141	I	0.304674	A	A	0.9970938709454265	(22, 141)
20	L	86	I	0.304327	A	A	0.9970399154755484	(20, 86)
52	S	53	R	0.298489	A	A	0.9959752204413236	(52, 53)
121	A	139	Y	0.297543	A	A	0.9957714460261682	(121, 139)
44	D	46	G	0.295484	A	A	0.9952933507596646	(44, 46)
59	W	123	I	0.29483200000000004	A	A	0.9951314983233174	(59, 123)
59	W	119	Y	0.293054	A	A	0.9946627055798338	(59, 119)
16	C	95	G	0.290865	A	A	0.9940263036748516	(16, 95)
89	T	93	L	0.289395	A	A	0.9935590229063428	(89, 93)
13	L	96	C	0.28830100000000003	A	A	0.9931888774733564	(13, 96)
107	L	108	L	0.282463	A	A	0.990845699373318	(107, 108)
29	V	41	A	0.2819	A	A	0.990583039281864	(29, 41)
32	A	36	D	0.280746	A	A	0.99002210329979	(32, 36)
60	G	128	L	0.279408	A	A	0.9893320048991792	(60, 128)
24	L	28	H	0.277272	A	A	0.98813561758817	(24, 28)
90	L	93	L	0.276962	A	A	0.9879517538743431	(90, 93)
28	H	31	A	0.27629000000000004	A	A	0.9875438663639632	(28, 31)
22	L	134	V	0.275264	A	A	0.9868957741726424	(22, 134)
122	W	126	F	0.274092	A	A	0.9861163934753958	(122, 126)
118	V	122	W	0.272608	A	A	0.985066478853496	(118, 122)
99	T	101	W	0.269677	A	A	0.9827683774655098	(99, 101)
88	Y	117	S	0.269386	A	A	0.9825228257286756	(88, 117)
41	A	52	S	0.268918	A	A	0.9821209792787138	(41, 52)
54	V	128	L	0.267878	A	A	0.981196563173352	(54, 128)
46	G	49	I	0.265174	A	A	0.978577797476862	(46, 49)
16	C	91	Q	0.2642	A	A	0.977553152615554	(16, 91)
88	Y	142	N	0.260034	A	A	0.9726287154990216	(88, 142)
17	L	92	L	0.259299	A	A	0.9716612204330101	(17, 92)
57	S	130	D	0.259008	A	A	0.971269410661616	(57, 130)
46	G	48	A	0.25863	A	A	0.9707529023588336	(46, 48)
148	L	151	R	0.258309	A	A	0.9703074843794508	(148, 151)
85	C	86	I	0.258159	A	A	0.9700971812524816	(85, 86)
39	Y	40	R	0.256151	A	A	0.9671447917635988	(39, 40)
50	S	53	R	0.253869	A	A	0.9634612041005618	(50, 53)
146	M	150	F	0.25328	A	A	0.9624500791037249	(146, 150)
87	F	109	S	0.251931	A	A	0.9600358402535276	(87, 109)
138	T	139	Y	0.25158600000000003	A	A	0.9593957675722974	(138, 139)
133	I	137	T	0.25088	A	A	0.9580563200968818	(133, 137)
27	L	85	C	0.249448	A	A	0.9552134676230044	(27, 85)
86	I	89	T	0.24873	A	A	0.9537222800043196	(86, 89)
50	S	52	S	0.248444	A	A	0.953115694684294	(50, 52)
105	L	108	L	0.24820100000000006	A	A	0.9525945824718468	(105, 108)
44	D	45	V	0.246795	A	A	0.9494737181200904	(44, 45)
94	L	98	R	0.245415	A	A	0.9462288878557964	(94, 98)
106	M	149	S	0.24476	A	A	0.9446232142062632	(106, 149)
36	D	39	Y	0.24469	A	A	0.9444490586029656	(36, 39)
149	S	150	F	0.242327	A	A	0.9382700532992712	(149, 150)
65	L	83	F	0.241905	A	A	0.9371032480372788	(65, 83)
55	F	124	L	0.241797	A	A	0.936801451108388	(55, 124)
84	G	120	L	0.239843	A	A	0.9311109630557616	(84, 120)
55	F	60	G	0.238398	A	A	0.9266114883703779	(55, 60)
19	G	138	T	0.237778	A	A	0.9246017449268912	(19, 138)
62	G	112	V	0.237102	A	A	0.9223547685825468	(62, 112)
121	A	124	L	0.236727	A	A	0.9210828113362952	(121, 124)
26	A	134	V	0.23642	A	A	0.9200277812279636	(26, 134)
31	A	35	R	0.235299	A	A	0.9160686014003164	(31, 35)
35	R	36	D	0.234774	A	A	0.9141556567397836	(35, 36)
116	G	119	Y	0.234133	A	A	0.91176813034715	(116, 119)
85	C	89	T	0.233552	A	A	0.9095539641076128	(85, 89)
63	F	65	L	0.232253	A	A	0.9044271142260788	(63, 65)
100	R	104	V	0.231976	A	A	0.9033017103578675	(100, 104)
23	S	88	Y	0.231131	A	A	0.8997973063360492	(23, 88)
21	V	25	Y	0.229002	A	A	0.8904783404388953	(21, 25)
46	G	47	T	0.22782800000000006	A	A	0.8850294983733645	(46, 47)
108	L	112	V	0.22777600000000006	A	A	0.8847829206959247	(108, 112)
147	W	151	R	0.223847	A	A	0.8648195822161729	(147, 151)
124	L	139	Y	0.223383	A	A	0.8622830642147079	(124, 139)
96	C	99	T	0.223249	A	A	0.8615432985654626	(96, 99)
49	I	57	S	0.222597	A	A	0.8578972212555113	(49, 57)
10	W	14	A	0.222429	A	A	0.8569451405864119	(10, 14)
89	T	90	L	0.221705	A	A	0.852782548729564	(89, 90)
58	R	119	Y	0.221654	A	A	0.8524856626776672	(58, 119)
40	R	41	A	0.22075100000000006	A	A	0.8471484598656167	(40, 41)
29	V	44	D	0.220329	A	A	0.8446015628100391	(29, 44)
103	S	149	S	0.220272	A	A	0.8442549623618164	(103, 149)
124	L	142	N	0.220051	A	A	0.8429052823883337	(124, 142)
98	R	99	T	0.219648	A	A	0.8404201110668218	(98, 99)
117	S	121	A	0.217287	A	A	0.8252302293950539	(117, 121)
117	S	139	Y	0.2156	A	A	0.8137063213992151	(117, 139)
30	K	52	S	0.214773	A	A	0.8078500570318369	(30, 52)
31	A	82	I	0.212723	A	A	0.7927406237264244	(31, 82)
15	L	148	L	0.212452	A	A	0.7906797576219422	(15, 148)
31	A	79	S	0.211694	A	A	0.7848365300767972	(31, 79)
143	V	146	M	0.211473	A	A	0.7831110098802111	(143, 146)
58	R	60	G	0.211402	A	A	0.7825545599102929	(58, 60)
62	G	83	F	0.208793	A	A	0.7614009273435438	(62, 83)
24	L	85	C	0.207342	A	A	0.7490448867537101	(24, 85)
44	D	47	T	0.20613	A	A	0.7384041778696007	(44, 47)
45	V	47	T	0.206113	A	A	0.7382528757417446	(45, 47)
97	L	102	A	0.20557	A	A	0.7333904758357337	(97, 102)
89	T	92	L	0.20417	A	A	0.720591378708611	(89, 92)
117	S	142	N	0.203093	A	A	0.7104921400418384	(117, 142)
54	V	57	S	0.202736	A	A	0.7070968113710043	(54, 57)
98	R	103	S	0.202631	A	A	0.7060937190471953	(98, 103)
29	V	32	A	0.202404	A	A	0.7039182277248446	(29, 32)
87	F	89	T	0.202091	A	A	0.7009031448558796	(87, 89)
121	A	136	I	0.201175	A	A	0.6919781761688739	(121, 136)
20	L	92	L	0.200724	A	A	0.6875292817908901	(20, 92)
56	S	58	R	0.199684	A	A	0.6771361137748372	(56, 58)
88	Y	139	Y	0.198791	A	A	0.6680666525357126	(88, 139)
111	L	114	L	0.198677	A	A	0.6668994213258863	(111, 114)
124	L	131	F	0.198075	A	A	0.6607009644900573	(124, 131)
64	G	65	L	0.197581	A	A	0.6555717205524223	(64, 65)
54	V	120	L	0.197531	A	A	0.6550504516045047	(54, 120)
83	F	116	G	0.197299	A	A	0.6526267367246286	(83, 116)
91	Q	106	M	0.197113	A	A	0.6506776555222572	(91, 106)
114	L	142	N	0.196903	A	A	0.6484707997521063	(114, 142)
28	H	32	A	0.196717	A	A	0.6465106461161242	(28, 32)
81	S	82	I	0.196217	A	A	0.641216140913498	(81, 82)
13	L	17	L	0.195374	A	A	0.6322084038508101	(13, 17)
125	F	126	F	0.195333	A	A	0.6317677717060951	(125, 126)
128	L	129	Y	0.194576	A	A	0.6235913227076251	(128, 129)
24	L	82	I	0.194279	A	A	0.6203626884254803	(24, 82)
50	S	54	V	0.194257	A	A	0.6201230769792311	(50, 54)
125	F	136	I	0.193816	A	A	0.6153069922505205	(125, 136)
33	R	52	S	0.193382	A	A	0.6105437443841932	(33, 52)
30	K	55	F	0.191449	A	A	0.5890638289844609	(30, 55)
60	G	124	L	0.190331	A	A	0.5764619679259336	(60, 124)
42	L	45	V	0.189305	A	A	0.5647970797436566	(42, 45)
57	S	59	W	0.187995	A	A	0.5497827198477437	(57, 59)
54	V	130	D	0.187902	A	A	0.5487122449537967	(54, 130)
27	L	79	S	0.18714	A	A	0.5399210390151739	(27, 79)
58	R	61	R	0.187078	A	A	0.5392042461940084	(58, 61)
12	R	14	A	0.18678	A	A	0.5357560972969305	(12, 14)
9	G	10	W	0.185296	A	A	0.5185221215782755	(9, 10)
53	R	60	G	0.185194	A	A	0.5173343290816329	(53, 60)
93	L	97	L	0.184884	A	A	0.5137222776000439	(93, 97)
110	S	111	L	0.184179	A	A	0.5054976058705904	(110, 111)
63	F	112	V	0.183649	A	A	0.4993072065699259	(63, 112)
145	L	149	S	0.183159	A	A	0.4935801260842079	(145, 149)
139	Y	142	N	0.182075	A	A	0.4809042966652761	(139, 142)
40	R	44	D	0.18122	A	A	0.4709083594640105	(40, 44)
93	L	102	A	0.181049	A	A	0.4689101282104296	(93, 102)
107	L	149	S	0.181028	A	A	0.4686647617744736	(107, 149)
62	G	119	Y	0.180937	A	A	0.4676015897669394	(62, 119)
14	A	143	V	0.179789	A	A	0.4542043493146708	(14, 143)
138	T	141	I	0.178856	A	A	0.44334512026404094	(138, 141)
63	F	116	G	0.178805	A	A	0.4427524882768295	(63, 116)
147	W	150	F	0.177155	A	A	0.42364719333052203	(147, 150)
55	F	81	S	0.17640999999999998	A	A	0.4150725747005701	(55, 81)
55	F	80	N	0.176257	A	A	0.41331626277532413	(55, 80)
57	S	128	L	0.176181	A	A	0.4124444673621169	(57, 128)
45	V	46	G	0.175241	A	A	0.4016978912187876	(45, 46)
30	K	81	S	0.175207	A	A	0.40131050335347307	(30, 81)
110	S	146	M	0.17461400000000002	A	A	0.3945698690044298	(110, 146)
80	N	124	L	0.174176	A	A	0.3896112588248029	(80, 124)
125	F	129	Y	0.173725	A	A	0.3845244167132892	(125, 129)
62	G	80	N	0.173691	A	A	0.3841417356277442	(62, 80)
142	N	143	V	0.173235	A	A	0.3790205940131806	(142, 143)
22	L	25	Y	0.172465	A	A	0.3704227854280372	(22, 25)
48	A	49	I	0.171982	A	A	0.3650632488990818	(48, 49)
117	S	138	T	0.171981	A	A	0.3650521804596088	(117, 138)
26	A	27	L	0.171654	A	A	0.3614391281650415	(26, 27)
42	L	133	I	0.171586	A	A	0.36068939191647786	(42, 133)
57	S	60	G	0.171455	A	A	0.3592466239022952	(57, 60)
20	L	24	L	0.170913	A	A	0.3532998037449927	(20, 24)
87	F	139	Y	0.170845	A	A	0.3525563148894581	(87, 139)
19	G	88	Y	0.17033099999999998	A	A	0.3469557369761884	(19, 88)
38	D	40	R	0.170208	A	A	0.3456206667112656	(38, 40)
49	I	136	I	0.169076	A	A	0.3334307560613254	(49, 136)
107	L	112	V	0.168223	A	A	0.3243661262197701	(107, 112)
90	L	94	L	0.167467	A	A	0.3164237734921277	(90, 94)
133	I	136	I	0.167251	A	A	0.3141708296317791	(133, 136)
107	L	110	S	0.167126	A	A	0.3128704122224211	(107, 110)
101	W	105	L	0.166863	A	A	0.31014247838505205	(101, 105)
38	D	39	Y	0.166577	A	A	0.30718864308042443	(38, 39)
132	C	135	C	0.16654000000000002	A	A	0.30680747597658986	(132, 135)
12	R	106	M	0.166094	A	A	0.30223059461076435	(12, 106)
29	V	40	R	0.166082	A	A	0.3021079053335345	(29, 40)
29	V	52	S	0.165305	A	A	0.2942154618755491	(29, 52)
9	G	95	G	0.165115	A	A	0.2923012138671033	(9, 95)
25	Y	57	S	0.164711	A	A	0.2882517758314821	(25, 57)
22	L	138	T	0.16453900000000002	A	A	0.28653644908320164	(22, 138)
37	R	38	D	0.163021	A	A	0.2716281725497584	(37, 38)
99	T	100	R	0.16301	A	A	0.2715216800786748	(99, 100)
143	V	144	S	0.16279000000000002	A	A	0.2693965609049437	(143, 144)
11	V	15	L	0.16258699999999998	A	A	0.2674436805383959	(11, 15)
10	W	21	V	0.16034	A	A	0.24635372292185945	(10, 21)
56	S	57	S	0.16001500000000002	A	A	0.24338497911724835	(56, 57)
88	Y	145	L	0.159419	A	A	0.23799553441848956	(88, 145)
50	S	55	F	0.159237	A	A	0.2363639858891895	(50, 55)
29	V	134	V	0.159018	A	A	0.2344096182207971	(29, 134)
50	S	130	D	0.157056	A	A	0.21733779390265395	(50, 130)
83	F	87	F	0.15705	A	A	0.2172868042547346	(83, 87)
141	I	142	N	0.156971	A	A	0.21661613848604766	(141, 142)
14	A	18	T	0.155589	A	A	0.2050945387495452	(14, 18)
118	V	143	V	0.155394	A	A	0.20350109477073844	(118, 143)
62	G	116	G	0.15495	A	A	0.1999028407365346	(62, 116)
121	A	122	W	0.154434	A	A	0.19577339217166428	(121, 122)
122	W	125	F	0.154346	A	A	0.19507476687702324	(122, 125)
12	R	148	L	0.154237	A	A	0.19421169753855688	(12, 148)
23	S	85	C	0.152977	A	A	0.18441782097798254	(23, 85)
18	T	137	T	0.152805	A	A	0.1831070225257928	(18, 137)
10	W	18	T	0.152693	A	A	0.1822568577646264	(10, 18)
117	S	118	V	0.152538	A	A	0.18108468633659092	(117, 118)
91	Q	110	S	0.152523	A	A	0.18097152125487195	(91, 110)
11	V	13	L	0.152258	A	A	0.1789801529381009	(11, 13)
134	V	137	T	0.151988	A	A	0.1769665537018169	(134, 137)
115	A	118	V	0.15093399999999998	A	A	0.1692541770148121	(115, 118)
99	T	102	A	0.15093299999999998	A	A	0.16924697164747096	(99, 102)
23	S	55	F	0.15038900000000002	A	A	0.16535864355731145	(23, 55)
60	G	61	R	0.150232	A	A	0.16424810348382696	(60, 61)
59	W	127	V	0.14952	A	A	0.15927708914937752	(59, 127)
31	A	61	R	0.14920999999999998	A	A	0.15714612279232784	(31, 61)
55	F	142	N	0.14868499999999998	A	A	0.1535832747301174	(55, 142)
17	L	18	T	0.148384	A	A	0.1515666246004349	(17, 18)
120	L	128	L	0.148371	A	A	0.15147995358208668	(120, 128)
50	S	94	L	0.14744100000000002	A	A	0.14537104298464076	(50, 94)
86	I	87	F	0.147037	A	A	0.14277323194585695	(86, 87)
118	V	142	N	0.146348	A	A	0.13842049662488834	(118, 142)
17	L	65	L	0.1463	A	A	0.13812089350953827	(17, 65)
89	T	91	Q	0.146116	A	A	0.13697678720097978	(89, 91)
11	V	89	T	0.145704	A	A	0.1344400738886152	(11, 89)
96	C	146	M	0.145385	A	A	0.1324997107257983	(96, 146)
22	L	81	S	0.14506	A	A	0.1305440715961492	(22, 81)
10	W	15	L	0.144988	A	A	0.13011371167866964	(10, 15)
91	Q	109	S	0.14490699999999998	A	A	0.12963080694966342	(91, 109)
53	R	54	V	0.144156	A	A	0.1252162863891809	(53, 54)
91	Q	113	S	0.144147	A	A	0.12516406733978505	(91, 113)
41	A	55	F	0.144098	A	A	0.12488004703834163	(41, 55)
11	V	112	V	0.14364100000000002	A	A	0.12225412657000775	(11, 112)
87	F	118	V	0.143019	A	A	0.11874651280006658	(87, 118)
94	L	97	L	0.142952	A	A	0.1183732236783146	(94, 97)
60	G	81	S	0.142078	A	A	0.11358398434633506	(60, 81)
39	Y	50	S	0.142056	A	A	0.11346534440462085	(39, 50)
127	V	128	L	0.141875	A	A	0.11249280574673158	(127, 128)
16	C	90	L	0.141265	A	A	0.10926151920407608	(16, 90)
56	S	105	L	0.141176	A	A	0.10879601201343904	(56, 105)
30	K	34	A	0.13943599999999998	A	A	0.09999460832669432	(30, 34)
55	F	121	A	0.139374	A	A	0.09969138448840993	(55, 121)
136	I	140	A	0.138982	A	A	0.09779053883496776	(136, 140)
53	R	56	S	0.138518	A	A	0.09557673387906976	(53, 56)
87	F	138	T	0.138185	A	A	0.09401192047561023	(87, 138)
111	L	115	A	0.138113	A	A	0.09367620024692884	(111, 115)
116	G	138	T	0.137753	A	A	0.09201148402628297	(116, 138)
92	L	100	R	0.137633	A	A	0.09146170055134532	(92, 100)
92	L	97	L	0.136508	A	A	0.08643055191632272	(92, 97)
86	I	90	L	0.135731	A	A	0.08308357217168823	(86, 90)
95	G	106	M	0.13556	A	A	0.0823607774795067	(95, 106)
127	V	130	D	0.135454	A	A	0.08191520762429459	(127, 130)
23	S	138	T	0.13508199999999998	A	A	0.08036643912281838	(23, 138)
22	L	124	L	0.13506700000000002	A	A	0.08030447420036521	(22, 124)
10	W	93	L	0.134406	A	A	0.0776109278676133	(10, 93)
29	V	30	K	0.134069	A	A	0.07626531115345071	(29, 30)
18	T	101	W	0.13397	A	A	0.07587352605613011	(18, 101)
25	Y	56	S	0.13377	A	A	0.07508688379560326	(25, 56)
110	S	142	N	0.132606	A	A	0.07063556844749587	(110, 142)
12	R	95	G	0.132007	A	A	0.06842786963045236	(12, 95)
38	D	89	T	0.131685	A	A	0.06726395443903294	(38, 89)
39	Y	134	V	0.131452	A	A	0.0664316047855724	(39, 134)
97	L	103	S	0.13131500000000002	A	A	0.06594603836335435	(97, 103)
129	Y	136	I	0.131083	A	A	0.06513021521280564	(129, 136)
105	L	109	S	0.13076600000000002	A	A	0.06402851815505092	(105, 109)
9	G	15	L	0.130421	A	A	0.06284646001093773	(9, 15)
62	G	64	G	0.130415	A	A	0.06282605776683435	(62, 64)
48	A	126	F	0.1295	A	A	0.05977609162184705	(48, 126)
9	G	99	T	0.129385	A	A	0.059401301703317824	(9, 99)
98	R	102	A	0.129216	A	A	0.05885394242669941	(98, 102)
124	L	136	I	0.12875799999999998	A	A	0.057390870275586266	(124, 136)
49	I	52	S	0.128597	A	A	0.05688354917381733	(49, 52)
14	A	15	L	0.12823800000000002	A	A	0.0557652816245771	(14, 15)
118	V	139	Y	0.127997	A	A	0.05502454172923989	(118, 139)
24	L	42	L	0.127971	A	A	0.0549451031158529	(24, 42)
101	W	109	S	0.127341	A	A	0.053048273396901616	(101, 109)
87	F	142	N	0.127145	A	A	0.05246903071704122	(87, 142)
18	T	98	R	0.127057	A	A	0.05221062628415521	(18, 98)
30	K	63	F	0.126927	A	A	0.05183077075556965	(30, 63)
100	R	108	L	0.126814	A	A	0.051502402127816635	(100, 108)
16	C	148	L	0.126718	A	A	0.05122475438639372	(16, 148)
45	V	137	T	0.126585	A	A	0.05084209343617336	(45, 137)
115	A	127	V	0.126475	A	A	0.05052735305924223	(115, 127)
26	A	29	V	0.126095	A	A	0.04945214997304485	(26, 29)
126	F	148	L	0.12607000000000002	A	A	0.049382066241658175	(126, 148)
55	F	56	S	0.126041	A	A	0.04930086968247107	(55, 56)
21	V	24	L	0.125903	A	A	0.048915962981312365	(21, 24)
35	R	37	R	0.12570499999999998	A	A	0.048367952060225095	(35, 37)
84	G	138	T	0.12546600000000002	A	A	0.04771308882355737	(84, 138)
44	D	55	F	0.1252	A	A	0.04699269976502097	(44, 55)
54	V	136	I	0.124935	A	A	0.0462837999829476	(54, 136)
82	I	94	L	0.124904	A	A	0.04620144111539014	(82, 94)
28	H	34	A	0.124241	A	A	0.04446825241106262	(28, 34)
30	K	56	S	0.124095	A	A	0.04409376277826378	(30, 56)
47	T	50	S	0.12361400000000003	A	A	0.042878059505194084	(47, 50)
20	L	23	S	0.122961	A	A	0.04127133309613384	(20, 23)
52	S	56	S	0.122616	A	A	0.040442422835862184	(52, 56)
36	D	49	I	0.122426	A	A	0.03999173660275671	(36, 49)
27	L	81	S	0.122325	A	A	0.03975383010624951	(27, 81)
33	R	49	I	0.121776	A	A	0.03848071678383636	(33, 49)
42	L	52	S	0.121637	A	A	0.038163706328649134	(42, 52)
53	R	142	N	0.121543	A	A	0.037950533593762686	(53, 142)
57	S	81	S	0.121387	A	A	0.037598899355051466	(57, 81)
90	L	91	Q	0.121251	A	A	0.037294517213847925	(90, 91)
113	S	139	Y	0.120886	A	A	0.03648752629165605	(113, 139)
104	V	107	L	0.120789	A	A	0.036275478463103486	(104, 107)
108	L	144	S	0.119875	A	A	0.034326342982032354	(108, 144)
149	S	151	R	0.119184	A	A	0.0329102639021382	(149, 151)
114	L	117	S	0.119153	A	A	0.032847872063016016	(114, 117)
55	F	87	F	0.118976	A	A	0.03249348411152125	(55, 87)
141	I	144	S	0.118901	A	A	0.03234426572739605	(141, 144)
113	S	138	T	0.11871	A	A	0.031966785074297024	(113, 138)
12	R	18	T	0.118492	A	A	0.03154035419257198	(12, 18)
79	S	81	S	0.11817	A	A	0.03091901098570005	(79, 81)
23	S	56	S	0.117867	A	A	0.03034351378378802	(23, 56)
36	D	40	R	0.117808	A	A	0.03023247990149925	(36, 40)
131	F	140	A	0.117361	A	A	0.029402016687997624	(131, 140)
109	S	136	I	0.117312	A	A	0.02931212947297474	(109, 136)
34	A	35	R	0.117221	A	A	0.029145793238280468	(34, 35)
30	K	35	R	0.116589	A	A	0.028011783430600096	(30, 35)
145	L	148	L	0.116316	A	A	0.027533251392222485	(145, 148)
95	G	101	W	0.116286	A	A	0.02748107674729021	(95, 101)
27	L	30	K	0.116181	A	A	0.02729910342309332	(27, 30)
51	C	57	S	0.116088	A	A	0.027138753265515743	(51, 57)
61	R	62	G	0.115781	A	A	0.02661489855563564	(61, 62)
92	L	151	R	0.115501	A	A	0.026144375549913917	(92, 151)
99	T	110	S	0.115451	A	A	0.026061076231456648	(99, 110)
17	L	19	G	0.11531199999999997	A	A	0.02583064752452429	(17, 19)
110	S	116	G	0.115275	A	A	0.025769592954056127	(110, 116)
111	L	118	V	0.114844	A	A	0.025067071269580448	(111, 118)
121	A	126	F	0.114741	A	A	0.024901532442600103	(121, 126)
120	L	138	T	0.114705	A	A	0.02484388629843574	(120, 138)
107	L	146	M	0.113962	A	A	0.023678374398888855	(107, 146)
58	R	118	V	0.113868	A	A	0.023534176863317074	(58, 118)
13	L	18	T	0.113521	A	A	0.0230081045804032	(13, 18)
45	V	121	A	0.11331199999999997	A	A	0.022695938211350464	(45, 121)
31	A	32	A	0.113301	A	A	0.022679605309532697	(31, 32)
60	G	138	T	0.113271	A	A	0.02263511011637484	(60, 138)
45	V	79	S	0.112563	A	A	0.021605659791747184	(45, 79)
18	T	21	V	0.112329	A	A	0.02127400663938441	(18, 21)
57	S	123	I	0.11225	A	A	0.021162988071609386	(57, 123)
113	S	114	L	0.112199	A	A	0.02109157122820009	(113, 114)
49	I	131	F	0.112095	A	A	0.020946550898605757	(49, 131)
87	F	94	L	0.112017	A	A	0.020838324613784362	(87, 94)
14	A	93	L	0.112003	A	A	0.02081894814829867	(14, 93)
52	S	55	F	0.111775	A	A	0.020505468190930198	(52, 55)
137	T	141	I	0.111681	A	A	0.020377361876882345	(137, 141)
41	A	42	L	0.111374	A	A	0.0199635492009166	(41, 42)
49	I	133	I	0.111365	A	A	0.019951523010362404	(49, 133)
32	A	104	V	0.11095	A	A	0.019403418882114404	(32, 104)
28	H	105	L	0.1109	A	A	0.019338227024601442	(28, 105)
112	V	114	L	0.110794	A	A	0.019200616225257053	(112, 114)
25	Y	33	R	0.110742	A	A	0.019133404254083858	(25, 33)
23	S	80	N	0.110623	A	A	0.018980320511781258	(23, 80)
109	S	112	V	0.110338	A	A	0.0186177851940342	(109, 112)
93	L	151	R	0.110335	A	A	0.01861399957266523	(93, 151)
126	F	127	V	0.110278	A	A	0.01854219305260197	(126, 127)
80	N	116	G	0.110121	A	A	0.018345588167355358	(80, 116)
111	L	149	S	0.109935	A	A	0.018114891648795758	(111, 149)
54	V	124	L	0.10973	A	A	0.017863401327576366	(54, 124)
30	K	44	D	0.109495	A	A	0.017578650959191814	(30, 44)
91	Q	147	W	0.109358	A	A	0.017414379387480132	(91, 147)
35	R	61	R	0.109043	A	A	0.017041464554352792	(35, 61)
112	V	119	Y	0.108866	A	A	0.01683482463071835	(112, 119)
23	S	50	S	0.108865	A	A	0.016833663063689733	(23, 50)
47	T	129	Y	0.108533	A	A	0.016451653769607586	(47, 129)
50	S	124	L	0.108524	A	A	0.016441398381640757	(50, 124)
83	F	108	L	0.108199	A	A	0.016074577156271332	(83, 108)
80	N	95	G	0.108072	A	A	0.01593307938096928	(80, 95)
47	T	52	S	0.107956	A	A	0.015804735497532956	(47, 52)
87	F	124	L	0.10731	A	A	0.015105471006242988	(87, 124)
19	G	93	L	0.107285	A	A	0.015078930955470962	(19, 93)
143	V	151	R	0.107234	A	A	0.015024908389976832	(143, 151)
14	A	24	L	0.106993	A	A	0.014771778010139253	(14, 24)
41	A	84	G	0.106947	A	A	0.01472386446553749	(41, 84)
24	L	49	I	0.106889	A	A	0.01466363435922545	(24, 49)
27	L	142	N	0.106717	A	A	0.014486213648271613	(27, 142)
48	A	52	S	0.106702	A	A	0.014470825166487409	(48, 52)
79	S	95	G	0.106477	A	A	0.014241609818209953	(79, 95)
113	S	117	S	0.106467	A	A	0.014231492349195662	(113, 117)
143	V	147	W	0.106395	A	A	0.01415882131321861	(143, 147)
49	I	124	L	0.106261	A	A	0.014024386746375735	(49, 124)
142	N	149	S	0.106249	A	A	0.014012399341093298	(142, 149)
48	A	54	V	0.106217	A	A	0.013980474211412278	(48, 54)
81	S	120	L	0.106178	A	A	0.013941646547168332	(81, 120)
21	V	147	W	0.106073	A	A	0.01383755211038188	(21, 147)
11	V	141	I	0.105856	A	A	0.013624453021274295	(11, 141)
114	L	115	A	0.105811	A	A	0.013580602466728757	(114, 115)
55	F	128	L	0.105692	A	A	0.013465202444528509	(55, 128)
58	R	127	V	0.105561	A	A	0.013339101478340987	(58, 127)
63	F	95	G	0.105456	A	A	0.013238732552595412	(63, 95)
12	R	16	C	0.105434	A	A	0.013217781975508514	(12, 16)
137	T	144	S	0.1053	A	A	0.01309076335321235	(137, 144)
90	L	109	S	0.105153	A	A	0.012952581319517929	(90, 109)
61	R	91	Q	0.104995	A	A	0.012805402405492671	(61, 91)
23	S	87	F	0.104845	A	A	0.012666954300302678	(23, 87)
147	W	149	S	0.104644	A	A	0.012483371087353649	(147, 149)
54	V	55	F	0.10462	A	A	0.012461598114284076	(54, 55)
45	V	49	I	0.104478	A	A	0.012333414476068873	(45, 49)
115	A	129	Y	0.10445	A	A	0.012308267631458704	(115, 129)
108	L	109	S	0.104183	A	A	0.012070591260631564	(108, 109)
55	F	133	I	0.103945	A	A	0.011861932978563607	(55, 133)
83	F	85	C	0.103778	A	A	0.011717304937511372	(83, 85)
57	S	117	S	0.103626	A	A	0.011586934774747277	(57, 117)
144	S	145	L	0.10347	A	A	0.011454380223225535	(144, 145)
81	S	130	D	0.103456	A	A	0.011442545725753877	(81, 130)
41	A	133	I	0.103278	A	A	0.011292955695572536	(41, 133)
27	L	140	A	0.103153	A	A	0.011188873706442457	(27, 140)
9	G	92	L	0.103085	A	A	0.011132586262763113	(9, 92)
137	T	142	N	0.103052	A	A	0.011105354601721443	(137, 142)
9	G	11	V	0.102876	A	A	0.010961045367153324	(9, 11)
55	F	126	F	0.102692	A	A	0.010811834194811418	(55, 126)
134	V	139	Y	0.102617	A	A	0.010751497122852718	(134, 139)
96	C	102	A	0.102535	A	A	0.01068584675004896	(96, 102)
10	W	20	L	0.102414	A	A	0.010589576738488784	(10, 20)
14	A	16	C	0.102381	A	A	0.010563445836891488	(14, 16)
9	G	96	C	0.102214	A	A	0.010432022012228087	(9, 96)
30	K	60	G	0.102102	A	A	0.010344639549508884	(30, 60)
111	L	112	V	0.101987	A	A	0.010255545751117869	(111, 112)
80	N	87	F	0.101843	A	A	0.010144878448055145	(80, 87)
93	L	140	A	0.101475	A	A	0.00986653071995934	(93, 140)
87	F	103	S	0.101365	A	A	0.00978456340694371	(87, 103)
90	L	105	L	0.101304	A	A	0.00973935154796397	(90, 105)
100	R	103	S	0.101231	A	A	0.009685472282463385	(100, 103)
62	G	95	G	0.10116	A	A	0.009633305339506971	(62, 95)
103	S	106	M	0.100752	A	A	0.009338002898687294	(103, 106)
102	A	105	L	0.100552	A	A	0.0091959994576144	(102, 105)
26	A	137	T	0.100511	A	A	0.009167110036788318	(26, 137)
80	N	81	S	0.100494	A	A	0.00915515348357085	(80, 81)
10	W	151	R	0.100436	A	A	0.009114457352787505	(10, 151)
139	Y	143	V	0.100242	A	A	0.008979419036436391	(139, 143)
97	L	140	A	0.100227	A	A	0.008969047084750286	(97, 140)
24	L	33	R	0.10013	A	A	0.008902213562049937	(24, 33)
26	A	55	F	0.100114	A	A	0.008891229071321255	(26, 55)
11	V	12	R	0.100084	A	A	0.00887066330141032	(11, 12)
104	V	146	M	0.099978	A	A	0.008798311743601352	(104, 146)
142	N	145	L	0.099873	A	A	0.008727123623707055	(142, 145)
21	V	150	F	0.099415	A	A	0.008422142293732537	(21, 150)
26	A	133	I	0.099321	A	A	0.008360649352760999	(26, 133)
54	V	61	R	0.099291	A	A	0.008341102143021282	(54, 61)
26	A	82	I	0.099242	A	A	0.008309256167633611	(26, 82)
129	Y	131	F	0.099219	A	A	0.008294342705783681	(129, 131)
21	V	137	T	0.099112	A	A	0.008225252852488263	(21, 137)
17	L	103	S	0.098956	A	A	0.008125375442815488	(17, 103)
29	V	42	L	0.098896	A	A	0.008087228629868659	(29, 42)
138	T	147	W	0.098882	A	A	0.008078349013047173	(138, 147)
30	K	120	L	0.098617	A	A	0.007911782362524006	(30, 120)
25	Y	29	V	0.09858	A	A	0.007888753146143878	(25, 29)
39	Y	55	F	0.09833	A	A	0.007734595934264489	(39, 55)
14	A	130	D	0.09822	A	A	0.0076675592205756185	(14, 130)
96	C	98	R	0.098206	A	A	0.0076590617935230485	(96, 98)
92	L	102	A	0.098137	A	A	0.007617295115943865	(92, 102)
21	V	32	A	0.09812	A	A	0.007607033699595702	(21, 32)
87	F	110	S	0.097871	A	A	0.007458037007285219	(87, 110)
27	L	28	H	0.097743	A	A	0.007382387157031501	(27, 28)
117	S	124	L	0.097737	A	A	0.007378856675479356	(117, 124)
37	R	45	V	0.097534	A	A	0.007260227425508898	(37, 45)
31	A	47	T	0.097472	A	A	0.007224311398563546	(31, 47)
111	L	140	A	0.097466	A	A	0.007220843453679374	(111, 140)
93	L	150	F	0.097392	A	A	0.0071781850269252235	(93, 150)
139	Y	141	I	0.097362	A	A	0.007160950454722342	(139, 141)
80	N	83	F	0.097207	A	A	0.007072448504959143	(80, 83)
10	W	16	C	0.09693	A	A	0.0069165362565023715	(10, 16)
119	Y	122	W	0.096716	A	A	0.006798037146062481	(119, 122)
33	R	41	A	0.096698	A	A	0.006788146860312248	(33, 41)
11	V	151	R	0.096645	A	A	0.0067590944391637785	(11, 151)
26	A	84	G	0.096595	A	A	0.006731780694241212	(26, 84)
25	Y	60	G	0.096582	A	A	0.006724694070592206	(25, 60)
102	A	103	S	0.096488	A	A	0.0066736354241676435	(102, 103)
97	L	148	L	0.096464	A	A	0.006660650608739193	(97, 148)
39	Y	42	L	0.096329	A	A	0.006587999139542608	(39, 42)
52	S	134	V	0.096168	A	A	0.00650221238666438	(52, 134)
148	L	150	F	0.095615	A	A	0.0062145473317999425	(148, 150)
81	S	106	M	0.095418	A	A	0.006114645075105908	(81, 106)
88	Y	136	I	0.095309	A	A	0.006059941707885938	(88, 136)
20	L	104	V	0.095119	A	A	0.005965553723324253	(20, 104)
65	L	92	L	0.094861	A	A	0.005839331702431143	(65, 92)
59	W	128	L	0.094835	A	A	0.005826734977473224	(59, 128)
14	A	144	S	0.09477	A	A	0.0057953413356993996	(14, 144)
124	L	130	D	0.094751	A	A	0.0057861911689434	(124, 130)
125	F	144	S	0.094644	A	A	0.0057348838318009	(125, 144)
144	S	148	L	0.094598	A	A	0.005712942289372006	(144, 148)
40	R	56	S	0.094578	A	A	0.005703424142511728	(40, 56)
61	R	81	S	0.094437	A	A	0.0056366922202744744	(61, 81)
21	V	35	R	0.094251	A	A	0.005549650700597893	(21, 35)
87	F	90	L	0.094101	A	A	0.005480267436824875	(87, 90)
89	T	104	V	0.094034	A	A	0.00544950863525121	(89, 104)
79	S	128	L	0.093779	A	A	0.005333742762955819	(79, 128)
25	Y	32	A	0.093635	A	A	0.005269271897619255	(25, 32)
87	F	88	Y	0.093628	A	A	0.005266154382834205	(87, 88)
93	L	98	R	0.093567	A	A	0.0052390519121647714	(93, 98)
94	L	109	S	0.093363	A	A	0.0051492498479062685	(94, 109)
41	A	80	N	0.093283	A	A	0.005114382358893482	(41, 80)
42	L	44	D	0.093268	A	A	0.005107866474262621	(42, 44)
34	A	115	A	0.093234	A	A	0.005093122526642085	(34, 115)
19	G	110	S	0.093159	A	A	0.0050607234204919395	(19, 110)
104	V	150	F	0.092927	A	A	0.00496157841723544	(104, 150)
49	I	134	V	0.092808	A	A	0.004911350068887336	(49, 134)
16	C	145	L	0.092702	A	A	0.004866963393922891	(16, 145)
22	L	46	G	0.092348	A	A	0.004721123473946271	(22, 46)
63	F	119	Y	0.092334	A	A	0.004715430895718545	(63, 119)
94	L	113	S	0.092295	A	A	0.0046996029021755936	(94, 113)
61	R	63	F	0.092147	A	A	0.004639936578810115	(61, 63)
28	H	29	V	0.092089	A	A	0.004616725244233128	(28, 29)
91	Q	95	G	0.091723	A	A	0.004472456347007627	(91, 95)
30	K	54	V	0.091628	A	A	0.004435625074969992	(30, 54)
35	R	47	T	0.091618	A	A	0.004431762726869478	(35, 47)
26	A	79	S	0.091517	A	A	0.0043929085886734226	(26, 79)
59	W	120	L	0.091484	A	A	0.004380274870502708	(59, 120)
33	R	50	S	0.091363	A	A	0.004334207880879086	(33, 50)
64	G	119	Y	0.091329	A	A	0.0043213357624359225	(64, 119)
26	A	124	L	0.091315	A	A	0.004316044671303893	(26, 124)
31	A	91	Q	0.09129	A	A	0.004306609613776878	(31, 91)
34	A	37	R	0.09112	A	A	0.004242902292395808	(34, 37)
81	S	118	V	0.091066	A	A	0.004222829661250531	(81, 118)
58	R	110	S	0.091065	A	A	0.004222458687520166	(58, 110)
41	A	50	S	0.091006	A	A	0.004200618869864576	(41, 50)
10	W	11	V	0.090974	A	A	0.004188812658766981	(10, 11)
44	D	54	V	0.090875	A	A	0.0041524607614534794	(44, 54)
61	R	79	S	0.090813	A	A	0.004129828027633445	(61, 79)
101	W	137	T	0.09077	A	A	0.0041141911006286995	(101, 137)
37	R	42	L	0.090728	A	A	0.004098965107267681	(37, 42)
93	L	105	L	0.090671	A	A	0.004078375796980805	(93, 105)
45	V	119	Y	0.090494	A	A	0.004014984771159925	(45, 119)
34	A	36	D	0.09038	A	A	0.00397458963161991	(34, 36)
113	S	124	L	0.090177	A	A	0.0039034898834703134	(113, 124)
47	T	125	F	0.08969500000000001	A	A	0.0037388750297617053	(47, 125)
34	A	81	S	0.08929400000000001	A	A	0.003606337432528753	(34, 81)
13	L	38	D	0.089151	A	A	0.0035600238619194493	(13, 38)
138	T	142	N	0.08909700000000001	A	A	0.003542663279873796	(138, 142)
24	L	105	L	0.088983	A	A	0.003506243022399566	(24, 105)
16	C	94	L	0.0888	A	A	0.003448426751264632	(16, 94)
20	L	81	S	0.0888	A	A	0.003448426751264632	(20, 81)
37	R	140	A	0.08873500000000001	A	A	0.0034280816897550217	(37, 140)
80	N	84	G	0.088392	A	A	0.0033223593107193595	(80, 84)
37	R	85	C	0.08833099999999999	A	A	0.003303842968342723	(37, 85)
80	N	138	T	0.088305	A	A	0.0032959767476198817	(80, 138)
28	H	108	L	0.088246	A	A	0.003278183933555615	(28, 108)
49	I	50	S	0.088089	A	A	0.003231223610087644	(49, 50)
35	R	65	L	0.087828	A	A	0.0031543879398439906	(35, 65)
46	G	50	S	0.08767899999999999	A	A	0.003111206047626593	(46, 50)
122	W	140	A	0.087527	A	A	0.003067659866479707	(122, 140)
33	R	56	S	0.08733300000000001	A	A	0.0030128149497540718	(33, 56)
83	F	86	I	0.087281	A	A	0.0029982529658709447	(83, 86)
108	L	115	A	0.08720399999999999	A	A	0.0029767970390718683	(108, 115)
47	T	60	G	0.087153	A	A	0.002962656042598853	(47, 60)
41	A	43	C	0.087035	A	A	0.0029301506520336877	(41, 43)
33	R	120	L	0.086969	A	A	0.002912098759135894	(33, 120)
97	L	151	R	0.086935	A	A	0.002902835280573669	(97, 151)
55	F	88	Y	0.086762	A	A	0.002856077401652005	(55, 88)
88	Y	134	V	0.08670800000000001	A	A	0.002841610776879321	(88, 134)
40	R	50	S	0.086687	A	A	0.002836001271444288	(40, 50)
146	M	151	R	0.086634	A	A	0.002821884690520025	(146, 151)
13	L	14	A	0.08659800000000001	A	A	0.0028123292783397524	(13, 14)
50	S	129	Y	0.08655299999999999	A	A	0.0028004226893324643	(50, 129)
38	D	115	A	0.086519	A	A	0.00279145429813796	(38, 115)
48	A	130	D	0.086493	A	A	0.002784612168914075	(48, 130)
26	A	136	I	0.086489	A	A	0.0027835607668198663	(26, 136)
9	G	85	C	0.08648099999999999	A	A	0.002781458948399592	(9, 85)
56	S	130	D	0.086397	A	A	0.0027594690532081927	(56, 130)
99	T	103	S	0.086355	A	A	0.002748528190188545	(99, 103)
103	S	107	L	0.086208	A	A	0.002710517525088068	(103, 107)
100	R	101	W	0.086101	A	A	0.002683124427320028	(100, 101)
53	R	128	L	0.086065	A	A	0.0026739597485400442	(53, 128)
96	C	103	S	0.08582000000000001	A	A	0.0026122747671973173	(96, 103)
28	H	81	S	0.08577699999999999	A	A	0.002601570953074864	(28, 81)
28	H	86	I	0.085664	A	A	0.0025736152942534896	(28, 86)
25	Y	42	L	0.085552	A	A	0.0025461529242386464	(25, 42)
116	G	140	A	0.085534	A	A	0.0025417620467949853	(116, 140)
10	W	28	H	0.085484	A	A	0.0025295980500663288	(10, 28)
59	W	108	L	0.085441	A	A	0.002519175602077936	(59, 108)
107	L	148	L	0.08543200000000001	A	A	0.0025169986659362067	(107, 148)
17	L	38	D	0.08531	A	A	0.002487642422727097	(17, 38)
46	G	52	S	0.085298	A	A	0.0024847703049287128	(46, 52)
43	C	51	C	0.08527	A	A	0.002478079373972782	(43, 51)
63	F	80	N	0.085191	A	A	0.0024592817742636586	(63, 80)
129	Y	133	I	0.085174	A	A	0.002455252200440133	(129, 133)
30	K	62	G	0.085135	A	A	0.0024460285403688463	(30, 62)
148	L	149	S	0.085005	A	A	0.0024154899905149928	(148, 149)
53	R	55	F	0.084871	A	A	0.0023843429621884017	(53, 55)
115	A	146	M	0.084825	A	A	0.0023737277067396078	(115, 146)
137	T	140	A	0.084812	A	A	0.002370734847729085	(137, 140)
98	R	151	R	0.084676	A	A	0.002339611866502802	(98, 151)
17	L	58	R	0.084596	A	A	0.0023214628630799264	(17, 58)
109	S	117	S	0.084468	A	A	0.002292667095728745	(109, 117)
113	S	144	S	0.084437	A	A	0.002285737814181423	(113, 144)
50	S	60	G	0.08414400000000001	A	A	0.002221097493797828	(50, 60)
11	V	19	G	0.084116	A	A	0.002215000378452616	(11, 19)
30	K	80	N	0.084013	A	A	0.0021926908926723256	(30, 80)
13	L	137	T	0.083995	A	A	0.002188811325441851	(13, 137)
13	L	91	Q	0.083942	A	A	0.0021774211662695677	(13, 91)
10	W	103	S	0.083887	A	A	0.002165653158122333	(10, 103)
63	F	83	F	0.083787	A	A	0.002144391783967017	(63, 83)
11	V	98	R	0.083733	A	A	0.0021329827496313182	(11, 98)
10	W	111	L	0.083659	A	A	0.0021174298767672496	(10, 111)
88	Y	90	L	0.083656	A	A	0.00211680134248032	(88, 90)
10	W	38	D	0.083618	A	A	0.00210885328046694	(10, 38)
35	R	38	D	0.083577	A	A	0.00210030549108756	(35, 38)
82	I	89	T	0.083362	A	A	0.002055950311961444	(82, 89)
57	S	58	R	0.083303	A	A	0.002043915124562385	(57, 58)
79	S	82	I	0.083273	A	A	0.002037817966938316	(79, 82)
90	L	96	C	0.08326	A	A	0.002035180550777737	(90, 96)
34	A	148	L	0.08308600000000001	A	A	0.002000151199522803	(34, 148)
94	L	116	G	0.082976	A	A	0.001978265152525649	(94, 116)
103	S	112	V	0.08295599999999999	A	A	0.0019743072801595364	(103, 112)
14	A	108	L	0.082768	A	A	0.0019374230452620465	(14, 108)
41	A	127	V	0.082761	A	A	0.0019360608058125574	(41, 127)
88	Y	143	V	0.082704	A	A	0.001924997812323216	(88, 143)
36	D	82	I	0.082696	A	A	0.0019234493138510335	(36, 82)
110	S	114	L	0.082564	A	A	0.0018980477916605348	(110, 114)
81	S	126	F	0.082557	A	A	0.0018967085454535183	(81, 126)
101	W	143	V	0.08226900000000001	A	A	0.001842283215184489	(101, 143)
34	A	57	S	0.081584	A	A	0.0017180170819768668	(34, 57)
118	V	128	L	0.081558	A	A	0.0017134410094531006	(118, 128)
90	L	147	W	0.081515	A	A	0.0017058950779758354	(90, 147)
27	L	121	A	0.08148999999999999	A	A	0.0017015205951102321	(27, 121)
57	S	113	S	0.081469	A	A	0.0016978532241243688	(57, 113)
12	R	103	S	0.081419	A	A	0.0016891477715117154	(12, 103)
9	G	100	R	0.08139400000000001	A	A	0.0016848089499724983	(9, 100)
113	S	116	G	0.081385	A	A	0.0016832492392047232	(113, 116)
104	V	148	L	0.08137899999999999	A	A	0.0016822100976010394	(104, 148)
40	R	42	L	0.08136	A	A	0.0016789229925998	(40, 42)
123	I	126	F	0.081349	A	A	0.0016770223684198506	(123, 126)
86	I	108	L	0.081086	A	A	0.001632108766148584	(86, 108)
89	T	99	T	0.080988	A	A	0.0016156302426339668	(89, 99)
99	T	151	R	0.080898	A	A	0.0016006187352419394	(99, 151)
93	L	101	W	0.080844	A	A	0.0015916675152970006	(93, 101)
99	T	148	L	0.080598	A	A	0.0015514135748014495	(99, 148)
24	L	86	I	0.080376	A	A	0.0015158156195973164	(24, 86)
117	S	146	M	0.080305	A	A	0.0015045748253514402	(117, 146)
9	G	13	L	0.080229	A	A	0.0014926191822510412	(9, 13)
106	M	113	S	0.08018600000000001	A	A	0.0014858898084807465	(106, 113)
42	L	48	A	0.08017	A	A	0.0014833922929912836	(42, 48)
15	L	34	A	0.080124	A	A	0.0014762313381612162	(15, 34)
110	S	150	F	0.079877	A	A	0.0014382689849617106	(110, 150)
55	F	79	S	0.07985700000000001	A	A	0.0014352309224613061	(55, 79)
92	L	93	L	0.07976	A	A	0.0014205717934431185	(92, 93)
128	L	138	T	0.07967	A	A	0.0014070819299166913	(128, 138)
82	I	83	F	0.07964199999999999	A	A	0.0014029068425872033	(82, 83)
60	G	79	S	0.079568	A	A	0.0013919221712325495	(60, 79)
80	N	113	S	0.079549	A	A	0.00138911333539442	(80, 113)
10	W	96	C	0.07938300000000001	A	A	0.0013647725601576893	(10, 96)
114	L	140	A	0.079374	A	A	0.0013634630691866795	(114, 140)
85	C	126	F	0.079361	A	A	0.0013615734244438375	(85, 126)
81	S	141	I	0.079338	A	A	0.0013582355346376622	(81, 141)
114	L	149	S	0.07921900000000001	A	A	0.0013410739220482415	(114, 149)
101	W	108	L	0.079013	A	A	0.0013117913516395528	(101, 108)
42	L	46	G	0.078962	A	A	0.0013046244061474842	(42, 46)
100	R	147	W	0.078956	A	A	0.0013037833786895836	(100, 147)
101	W	151	R	0.078935	A	A	0.0013008433282892767	(101, 151)
50	S	135	C	0.078898	A	A	0.00129567663921278	(50, 135)
87	F	127	V	0.07877200000000001	A	A	0.0012782096550387533	(87, 127)
121	A	147	W	0.078718	A	A	0.001270783926867576	(121, 147)
114	L	129	Y	0.07862899999999999	A	A	0.0012586234504990195	(114, 129)
40	R	49	I	0.078588	A	A	0.0012530540509153862	(40, 49)
64	G	79	S	0.078488	A	A	0.0012395559681505194	(64, 79)
18	T	31	A	0.078431	A	A	0.0012319162736164767	(18, 31)
33	R	40	R	0.078385	A	A	0.0012257794708059266	(33, 40)
89	T	100	R	0.07831	A	A	0.0012158282951515195	(89, 100)
33	R	55	F	0.078279	A	A	0.0012117347986551064	(33, 55)
106	M	109	S	0.07812899999999999	A	A	0.0011920889764044282	(106, 109)
83	F	119	Y	0.078078	A	A	0.0011854700074673912	(83, 119)
28	H	38	D	0.077904	A	A	0.0011631170591667429	(28, 38)
16	C	102	A	0.0779	A	A	0.0011626073477460034	(16, 102)
92	L	96	C	0.077828	A	A	0.0011534642417612476	(92, 96)
15	L	107	L	0.07775900000000001	A	A	0.0011447582633672515	(15, 107)
20	L	27	L	0.077702	A	A	0.0011376076325314564	(20, 27)
83	F	109	S	0.077613	A	A	0.0011265168845679815	(83, 109)
32	A	42	L	0.07761	A	A	0.0011261446110586435	(32, 42)
98	R	108	L	0.077597	A	A	0.0011245326074959894	(98, 108)
25	Y	34	A	0.077532	A	A	0.0011165013360447213	(25, 34)
14	A	38	D	0.077468	A	A	0.0011086402730662779	(14, 38)
25	Y	54	V	0.07746	A	A	0.001107660884115052	(25, 54)
126	F	146	M	0.077448	A	A	0.0011061931495780811	(126, 146)
15	L	28	H	0.077271	A	A	0.0010847311896462963	(15, 28)
86	I	102	A	0.077249	A	A	0.0010820879654837472	(86, 102)
12	R	47	T	0.077109	A	A	0.001065392629858007	(12, 47)
28	H	129	Y	0.077049	A	A	0.0010583033630107447	(28, 129)
104	V	110	S	0.076939	A	A	0.0010454082592054725	(104, 110)
82	I	96	C	0.076836	A	A	0.0010334524915782742	(82, 96)
15	L	56	S	0.076774	A	A	0.001026310811541425	(15, 56)
144	S	147	W	0.07674600000000001	A	A	0.0010230990200496817	(144, 147)
90	L	133	I	0.076352	A	A	0.0009787836513679537	(90, 133)
19	G	117	S	0.07632699999999999	A	A	0.0009760265413690193	(19, 117)
39	Y	148	L	0.076174	A	A	0.0009592934458716721	(39, 148)
16	C	33	R	0.076162	A	A	0.000957991207073838	(16, 33)
120	L	142	N	0.076132	A	A	0.0009547420448358314	(120, 142)
12	R	149	S	0.07609400000000001	A	A	0.0009506396094925703	(12, 149)
31	A	63	F	0.076086	A	A	0.0009497778109797836	(31, 63)
24	L	27	L	0.07596900000000001	A	A	0.0009372481068928803	(24, 27)
116	G	139	Y	0.075886	A	A	0.0009284431846139096	(116, 139)
14	A	32	A	0.07587	A	A	0.0009267537913229926	(14, 32)
79	S	106	M	0.075843	A	A	0.0009239087423355473	(79, 106)
45	V	80	N	0.075672	A	A	0.0009060584044609578	(45, 80)
18	T	57	S	0.075574	A	A	0.0008959584622085189	(18, 57)
44	D	119	Y	0.075571	A	A	0.000895650765192962	(44, 119)
101	W	102	A	0.075401	A	A	0.0008783577499976987	(101, 102)
22	L	29	V	0.075386	A	A	0.0008768453388411355	(22, 29)
127	V	145	L	0.075324	A	A	0.0008706170227141448	(127, 145)
32	A	56	S	0.075184	A	A	0.0008566884867123046	(32, 56)
102	A	104	V	0.075047	A	A	0.0008432385659493202	(102, 104)
61	R	136	I	0.075019	A	A	0.0008405114393835345	(61, 136)
112	V	146	M	0.074985	A	A	0.0008372098081022201	(112, 146)
141	I	145	L	0.074917	A	A	0.0008306389451249124	(141, 145)
22	L	60	G	0.07484099999999999	A	A	0.000823345930090767	(22, 60)
64	G	82	I	0.074831	A	A	0.0008223903062547402	(64, 82)
54	V	121	A	0.07482799999999999	A	A	0.0008221037993367616	(54, 121)
44	D	80	N	0.074798	A	A	0.0008192433002783801	(44, 80)
60	G	63	F	0.074792	A	A	0.0008186721965914366	(60, 63)
98	R	104	V	0.074789	A	A	0.0008183867691395494	(98, 104)
146	M	148	L	0.074739	A	A	0.0008136418353546415	(146, 148)
85	C	111	L	0.07445700000000001	A	A	0.0007873074221630349	(85, 111)
107	L	151	R	0.074396	A	A	0.0007817054423138573	(107, 151)
81	S	116	G	0.07435599999999999	A	A	0.0007780500752028131	(81, 116)
96	C	149	S	0.07422000000000001	A	A	0.0007657281899863638	(96, 149)
50	S	80	N	0.07416299999999999	A	A	0.0007606124616820561	(50, 80)
93	L	96	C	0.073942	A	A	0.0007410462750419843	(93, 96)
98	R	105	L	0.073837	A	A	0.0007318982260094868	(98, 105)
26	A	139	Y	0.073729	A	A	0.0007225872167644147	(26, 139)
80	N	98	R	0.073726	A	A	0.000722329994203787	(80, 98)
87	F	91	Q	0.073635	A	A	0.0007145637737252182	(87, 91)
30	K	33	R	0.073629	A	A	0.0007140541715947967	(30, 33)
32	A	33	R	0.073571	A	A	0.0007091436208978469	(32, 33)
35	R	104	V	0.07349800000000001	A	A	0.0007030031537972193	(35, 104)
84	G	87	F	0.073281	A	A	0.0006850111643152218	(84, 87)
21	V	149	S	0.073226	A	A	0.0006805125101191451	(21, 149)
126	F	129	Y	0.073192	A	A	0.0006777438690514322	(126, 129)
90	L	102	A	0.073186	A	A	0.0006772562620054683	(90, 102)
10	W	105	L	0.073078	A	A	0.0006685292427845092	(10, 105)
54	V	79	S	0.07299800000000001	A	A	0.0006621254375863673	(54, 79)
115	A	147	W	0.07299299999999999	A	A	0.0006617269049528139	(115, 147)
54	V	56	S	0.07296	A	A	0.000659101605149138	(54, 56)
17	L	120	L	0.07295	A	A	0.0006583077774178897	(17, 120)
61	R	83	F	0.072886	A	A	0.0006532461444910892	(61, 83)
23	S	84	G	0.07281499999999999	A	A	0.0006476689277306942	(23, 84)
61	R	65	L	0.072777	A	A	0.0006447002979372079	(61, 65)
44	D	129	Y	0.07276200000000001	A	A	0.000643531599993821	(44, 129)
35	R	58	R	0.072741	A	A	0.0006418983930812037	(35, 58)
18	T	105	L	0.072733	A	A	0.0006412771294417594	(18, 105)
28	H	48	A	0.072701	A	A	0.0006387970897299219	(28, 48)
56	S	81	S	0.072622	A	A	0.0006327087382733183	(56, 81)
85	C	131	F	0.072576	A	A	0.0006291859842734157	(85, 131)
15	L	40	R	0.072515	A	A	0.000624539763833289	(15, 40)
50	S	51	C	0.072502	A	A	0.0006235532964217487	(50, 51)
144	S	149	S	0.072452	A	A	0.000619771301096992	(144, 149)
32	A	34	A	0.072399	A	A	0.0006157833077831795	(32, 34)
35	R	108	L	0.072358	A	A	0.0006127129698130244	(35, 108)
25	Y	134	V	0.07234199999999999	A	A	0.000611518260602227	(25, 134)
11	V	147	W	0.072308	A	A	0.0006089859586149599	(11, 147)
50	S	133	I	0.072224	A	A	0.0006027671844282677	(50, 133)
101	W	140	A	0.072061	A	A	0.0005908509753961063	(101, 140)
100	R	140	A	0.071867	A	A	0.0005769254634669281	(100, 140)
105	L	149	S	0.07186000000000001	A	A	0.0005764281656073043	(105, 149)
64	G	102	A	0.071656	A	A	0.0005620918872395271	(64, 102)
15	L	38	D	0.071504	A	A	0.0005516046349841963	(15, 38)
130	D	131	F	0.071409	A	A	0.0005451334864398318	(130, 131)
25	Y	50	S	0.071363	A	A	0.0005420229517466358	(25, 50)
104	V	105	L	0.071274	A	A	0.0005360468297521074	(104, 105)
63	F	103	S	0.071262	A	A	0.0005352452887543751	(63, 103)
35	R	92	L	0.071113	A	A	0.0005253759357449171	(35, 92)
102	A	106	M	0.071072	A	A	0.0005226870473947646	(102, 106)
28	H	42	L	0.070935	A	A	0.0005137854873178187	(28, 42)
57	S	134	V	0.07084700000000001	A	A	0.0005081348035346646	(57, 134)
114	L	141	I	0.070815	A	A	0.0005060929313071837	(114, 141)
14	A	151	R	0.070809	A	A	0.0005057108448118906	(14, 151)
27	L	37	R	0.070771	A	A	0.0005032965584911347	(27, 37)
108	L	150	F	0.070717	A	A	0.0004998823090252473	(108, 150)
47	T	96	C	0.070631	A	A	0.0004944847795512129	(47, 96)
86	I	130	D	0.070526	A	A	0.0004879609108453869	(86, 130)
11	V	122	W	0.070509	A	A	0.00048691146540500607	(11, 122)
131	F	139	Y	0.070488	A	A	0.0004856176975281549	(131, 139)
64	G	95	G	0.070421	A	A	0.000481509158888604	(64, 95)
48	A	104	V	0.070272	A	A	0.00047247635292244246	(48, 104)
24	L	65	L	0.070216	A	A	0.00046911831940379023	(24, 65)
80	N	142	N	0.070159	A	A	0.0004657208418385303	(80, 142)
28	H	44	D	0.070033	A	A	0.00045828359567195184	(28, 44)
91	Q	116	G	0.06996000000000001	A	A	0.0004540203536307073	(91, 116)
57	S	80	N	0.06995499999999999	A	A	0.0004537295689135656	(57, 80)
57	S	136	I	0.06991900000000001	A	A	0.000451640514310216	(57, 136)
22	L	23	S	0.06981699999999999	A	A	0.0004457651724742865	(22, 23)
50	S	134	V	0.069814	A	A	0.00044559334112485437	(50, 134)
18	T	40	R	0.069813	A	A	0.00044553607632438156	(18, 40)
99	T	115	A	0.069803	A	A	0.00044496376687459696	(99, 115)
102	A	113	S	0.069779	A	A	0.0004435927331512357	(102, 113)
118	V	126	F	0.069727	A	A	0.0004406342815216575	(118, 126)
55	F	123	I	0.069688	A	A	0.0004384262924765384	(55, 123)
19	G	27	L	0.069457	A	A	0.00042553712847760673	(19, 27)
58	R	123	I	0.069398	A	A	0.00042229643209212473	(58, 123)
11	V	21	V	0.069379	A	A	0.000421257225589959	(11, 21)
108	L	151	R	0.06929400000000001	A	A	0.0004166343116027004	(108, 151)
18	T	112	V	0.069276	A	A	0.0004156608104261406	(18, 112)
100	R	107	L	0.06919700000000001	A	A	0.0004114107074212336	(100, 107)
93	L	95	G	0.069186	A	A	0.00041082181682261233	(93, 95)
106	M	110	S	0.06912	A	A	0.000407303271872601	(106, 110)
26	A	31	A	0.069119	A	A	0.0004072501552473297	(26, 31)
101	W	150	F	0.068906	A	A	0.0003960676777553399	(101, 150)
9	G	147	W	0.06890299999999999	A	A	0.0003959120338177125	(9, 147)
24	L	100	R	0.068901	A	A	0.0003958082996493159	(24, 100)
92	L	98	R	0.068881	A	A	0.0003947722091479179	(92, 98)
21	V	48	A	0.06883	A	A	0.00039214045315271465	(21, 48)
28	H	94	L	0.06879	A	A	0.0003900866261156789	(28, 94)
22	L	115	A	0.068789	A	A	0.0003900353960923202	(22, 115)
93	L	94	L	0.068762	A	A	0.00038865431375010966	(93, 94)
39	Y	43	C	0.068761	A	A	0.0003886032413109765	(39, 43)
22	L	85	C	0.068757	A	A	0.0003883990077580753	(22, 85)
13	L	101	W	0.068699	A	A	0.00038544770806122643	(13, 101)
123	I	125	F	0.068612	A	A	0.00038105598983996915	(123, 125)
45	V	100	R	0.068523	A	A	0.0003766067602333793	(45, 100)
18	T	42	L	0.068505	A	A	0.00037571222788895716	(18, 42)
24	L	64	G	0.068499	A	A	0.0003754144462705978	(24, 64)
52	S	58	R	0.068489	A	A	0.0003749185829445882	(52, 58)
95	G	96	C	0.068441	A	A	0.0003725460696600824	(95, 96)
23	S	134	V	0.068438	A	A	0.0003723982061859118	(23, 134)
36	D	128	L	0.06840800000000001	A	A	0.00037092227361681804	(36, 128)
60	G	90	L	0.068338	A	A	0.00036749747932822587	(60, 90)
26	A	81	S	0.068311	A	A	0.0003661835874043461	(26, 81)
62	G	106	M	0.06831	A	A	0.00036613500042959784	(62, 106)
25	Y	81	S	0.06830599999999999	A	A	0.0003659407065431517	(25, 81)
60	G	80	N	0.06823	A	A	0.0003622655032656966	(60, 80)
44	D	49	I	0.06821100000000001	A	A	0.0003613515512081344	(44, 49)
55	F	117	S	0.068178	A	A	0.0003597687530343263	(55, 117)
9	G	24	L	0.068074	A	A	0.0003548184943181583	(9, 24)
44	D	134	V	0.067973	A	A	0.00035006579718129715	(44, 134)
32	A	48	A	0.06795	A	A	0.00034899099247825434	(32, 48)
115	A	126	F	0.067876	A	A	0.0003455516720101294	(115, 126)
104	V	151	R	0.067712	A	A	0.0003380305439545743	(104, 151)
48	A	144	S	0.067585	A	A	0.0003323009882325304	(48, 144)
121	A	133	I	0.06754600000000001	A	A	0.0003305579496487854	(121, 133)
32	A	93	L	0.06752000000000001	A	A	0.00032940018851136145	(32, 93)
90	L	99	T	0.067504	A	A	0.00032868941172920293	(90, 99)
137	T	143	V	0.067493	A	A	0.0003282014991301257	(137, 143)
13	L	105	L	0.067326	A	A	0.0003208683726419851	(13, 105)
85	C	151	R	0.067246	A	A	0.0003174044872384956	(85, 151)
59	W	138	T	0.06720599999999999	A	A	0.00031568434182320884	(59, 138)
47	T	150	F	0.067199	A	A	0.0003153841218720772	(47, 150)
101	W	111	L	0.067197	A	A	0.0003152983887474116	(101, 111)
116	G	136	I	0.06715800000000001	A	A	0.0003136304961682116	(116, 136)
18	T	37	R	0.06713999999999999	A	A	0.00031286319969965333	(18, 37)
51	C	135	C	0.066977	A	A	0.00030598631643237684	(51, 135)
44	D	137	T	0.066953	A	A	0.00030498456487439884	(44, 137)
90	L	106	M	0.066925	A	A	0.00030381933414749124	(90, 106)
36	D	145	L	0.066901	A	A	0.00030282354040123534	(36, 145)
87	F	106	M	0.06689400000000001	A	A	0.0003025336169920256	(87, 106)
52	S	133	I	0.06687799999999999	A	A	0.00030187180945110895	(52, 133)
24	L	56	S	0.066683	A	A	0.0002939031599077085	(24, 56)
21	V	100	R	0.066623	A	A	0.00029148708715032775	(21, 100)
28	H	82	I	0.066593	A	A	0.0002902853166572899	(28, 82)
142	N	150	F	0.06657	A	A	0.00028936677838307365	(142, 150)
17	L	98	R	0.066474	A	A	0.0002855591780448775	(17, 98)
59	W	65	L	0.066465	A	A	0.0002852043823679143	(59, 65)
10	W	92	L	0.066461	A	A	0.00028504681423373323	(10, 92)
17	L	27	L	0.06642200000000001	A	A	0.0002835143511475304	(17, 27)
122	W	146	M	0.06636900000000001	A	A	0.00028144286515443894	(122, 146)
39	Y	53	R	0.066316	A	A	0.00027938410189218954	(39, 53)
16	C	101	W	0.066254	A	A	0.0002769918003162981	(16, 101)
31	A	34	A	0.066235	A	A	0.0002762621284206696	(31, 34)
65	L	97	L	0.066202	A	A	0.000274998639819468	(65, 97)
120	L	126	F	0.066109	A	A	0.00027146397801483454	(120, 126)
16	C	86	I	0.066101	A	A	0.00027116171182750933	(16, 86)
55	F	85	C	0.066039	A	A	0.0002688287187002582	(55, 85)
52	S	80	N	0.066028	A	A	0.0002684165667324914	(52, 80)
81	S	131	F	0.065971	A	A	0.00026628936073657127	(81, 131)
25	Y	85	C	0.065914	A	A	0.00026417633340804203	(25, 85)
25	Y	86	I	0.065832	A	A	0.000261161258056181	(25, 86)
13	L	22	L	0.06569900000000001	A	A	0.0002563324389541192	(13, 22)
92	L	143	V	0.065586	A	A	0.0002522889170304008	(92, 143)
84	G	113	S	0.06541699999999999	A	A	0.0002463416313075692	(84, 113)
29	V	91	Q	0.065256	A	A	0.00024078591927103048	(29, 91)
46	G	59	W	0.065162	A	A	0.00023759119464835055	(46, 59)
9	G	146	M	0.065078	A	A	0.00023476656036603463	(9, 146)
82	I	123	I	0.065015	A	A	0.0002326666624354038	(82, 123)
62	G	79	S	0.06500700000000001	A	A	0.00023240114250865768	(62, 79)
11	V	100	R	0.064874	A	A	0.0002280240624508561	(11, 100)
26	A	128	L	0.064873	A	A	0.00022799141659846225	(26, 128)
42	L	137	T	0.064872	A	A	0.00022795877467707607	(42, 137)
20	L	46	G	0.064868	A	A	0.00022782824629403238	(20, 46)
49	I	112	V	0.064858	A	A	0.00022750220032119199	(49, 112)
48	A	125	F	0.064825	A	A	0.000226429031566542	(48, 125)
21	V	107	L	0.064778	A	A	0.00022490793191137554	(21, 107)
48	A	86	I	0.06477000000000001	A	A	0.00022464987933074927	(48, 86)
12	R	48	A	0.06468600000000001	A	A	0.00022195532942356845	(12, 48)
26	A	50	S	0.06468	A	A	0.00022176390655115425	(26, 50)
109	S	116	G	0.06461900000000001	A	A	0.00021982564444221407	(109, 116)
144	S	150	F	0.064568	A	A	0.0002182160880393933	(144, 150)
12	R	140	A	0.064506	A	A	0.0002162727370727526	(12, 140)
103	S	140	A	0.064478	A	A	0.00021539987991651244	(103, 140)
44	D	53	R	0.06447	A	A	0.00021515103730116692	(44, 53)
63	F	108	L	0.064415	A	A	0.00021344678371335143	(63, 108)
109	S	144	S	0.06440499999999999	A	A	0.00021313814324155282	(109, 144)
87	F	129	Y	0.064402	A	A	0.0002130456243666644	(87, 129)
89	T	109	S	0.064373	A	A	0.00021215301623120204	(89, 109)
86	I	100	R	0.06426	A	A	0.00020870488400144858	(86, 100)
106	M	133	I	0.06422	A	A	0.00020749566599720468	(106, 133)
17	L	89	T	0.064105	A	A	0.0002040519618827476	(17, 89)
31	A	129	Y	0.064093	A	A	0.0002036954076750844	(31, 129)
17	L	118	V	0.064052	A	A	0.000202481135398117	(17, 118)
29	V	33	R	0.063946	A	A	0.00019937000704678325	(29, 33)
51	C	54	V	0.063935	A	A	0.00019904947201562355	(51, 54)
33	R	42	L	0.063868	A	A	0.0001971064775117912	(33, 42)
125	F	127	V	0.063867	A	A	0.00019707759900605638	(125, 127)
33	R	111	L	0.06386	A	A	0.00019687554920519348	(33, 111)
23	S	133	I	0.063838	A	A	0.00019624167073583828	(23, 133)
134	V	148	L	0.063832	A	A	0.0001960690933659522	(134, 148)
41	A	81	S	0.063764	A	A	0.0001941221312606432	(41, 81)
80	N	115	A	0.063687	A	A	0.00019193716452989894	(80, 115)
122	W	147	W	0.063583	A	A	0.00018901895074825503	(122, 147)
63	F	120	L	0.063435	A	A	0.00018493060438334486	(63, 120)
34	A	48	A	0.063425	A	A	0.00018465707331932025	(34, 48)
90	L	98	R	0.063417	A	A	0.00018443849395893564	(90, 98)
50	S	132	C	0.063401	A	A	0.00018400198913744205	(50, 132)
118	V	133	I	0.063375	A	A	0.0001832945252250374	(118, 133)
126	F	150	F	0.063351	A	A	0.00018264351714264223	(126, 150)
80	N	101	W	0.063306	A	A	0.00018142812721003788	(80, 101)
100	R	133	I	0.063289	A	A	0.00018097075697899289	(100, 133)
25	Y	35	R	0.063288	A	A	0.00018094388313231365	(25, 35)
36	D	111	L	0.063251	A	A	0.00017995191200943043	(36, 111)
16	C	48	A	0.063164	A	A	0.000177637480722873	(16, 48)
29	V	120	L	0.063071	A	A	0.00017519122541510582	(29, 120)
118	V	151	R	0.063025	A	A	0.00017399178459193292	(118, 151)
13	L	144	S	0.063014	A	A	0.00017370598963378764	(13, 144)
46	G	58	R	0.063013	A	A	0.00017368002790719937	(46, 58)
53	R	124	L	0.06299	A	A	0.00017308381025841002	(53, 124)
79	S	138	T	0.062952	A	A	0.00017210253510017049	(79, 138)
30	K	42	L	0.062947	A	A	0.00017197376977863066	(30, 42)
79	S	80	N	0.062939	A	A	0.00017176791419306727	(79, 80)
109	S	131	F	0.062923	A	A	0.0001713568261479442	(109, 131)
18	T	22	L	0.062914	A	A	0.00017112595382803823	(18, 22)
97	L	150	F	0.06289199999999999	A	A	0.0001705627029740744	(97, 150)
42	L	86	I	0.062891	A	A	0.00017053713784397374	(42, 86)
25	Y	107	L	0.06282599999999999	A	A	0.00016888231889759098	(25, 107)
59	W	139	Y	0.062777	A	A	0.00016764380834251617	(59, 139)
41	A	120	L	0.062687	A	A	0.0001653889392727596	(41, 120)
103	S	134	V	0.062618	A	A	0.00016367757542792077	(103, 134)
24	L	124	L	0.062609	A	A	0.0001634554591050442	(24, 124)
94	L	105	L	0.06244400000000001	A	A	0.0001594281470677465	(94, 105)
49	I	95	G	0.062414	A	A	0.0001587049777383284	(49, 95)
58	R	105	L	0.06239500000000001	A	A	0.00015824840326575834	(58, 105)
23	S	103	S	0.062362	A	A	0.00015745803892909196	(23, 103)
81	S	85	C	0.062186	A	A	0.0001532987723822716	(81, 85)
39	Y	52	S	0.062183	A	A	0.00015322868752042266	(39, 52)
91	Q	94	L	0.062155	A	A	0.00015257586486534176	(91, 94)
27	L	148	L	0.062061	A	A	0.00015040138338052891	(27, 148)
111	L	125	F	0.061986	A	A	0.0001486852372813225	(111, 125)
14	A	101	W	0.061836	A	A	0.00014530248682438212	(14, 101)
12	R	110	S	0.061827	A	A	0.00014510160534376846	(12, 110)
58	R	62	G	0.06171	A	A	0.0001425114051122869	(58, 62)
53	R	127	V	0.061709	A	A	0.00014248943606055454	(53, 127)
28	H	97	L	0.061669000000000015	A	A	0.00014161301555632951	(28, 97)
40	R	129	Y	0.061668	A	A	0.00014159116349691294	(40, 129)
46	G	55	F	0.061607	A	A	0.00014026356060940662	(46, 55)
45	V	123	I	0.061430999999999986	A	A	0.00013649186441644397	(45, 123)
24	L	151	R	0.061407	A	A	0.0001359842427891981	(24, 151)
26	A	85	C	0.061304	A	A	0.00013382376649750512	(26, 85)
39	Y	80	N	0.06126	A	A	0.00013290972396197328	(39, 80)
127	V	133	I	0.061121	A	A	0.0001300567493929305	(127, 133)
36	D	112	V	0.06108400000000001	A	A	0.00012930610555196372	(36, 112)
58	R	122	W	0.061028999999999986	A	A	0.00012819705093367794	(58, 122)
11	V	85	C	0.06102000000000001	A	A	0.00012801633685435008	(11, 85)
87	F	123	I	0.060974	A	A	0.0001270960454436717	(87, 123)
63	F	150	F	0.060883000000000013	A	A	0.00012529193179525508	(63, 150)
61	R	129	Y	0.060822	A	A	0.00012409473841457959	(61, 129)
9	G	151	R	0.060779	A	A	0.00012325663815364261	(9, 151)
109	S	113	S	0.06077000000000001	A	A	0.0001230818287343864	(109, 113)
114	L	121	A	0.060766	A	A	0.00012300420295878098	(114, 121)
122	W	150	F	0.060706	A	A	0.00012184477314682805	(122, 150)
136	I	138	T	0.060665	A	A	0.00012105782136126877	(136, 138)
30	K	86	I	0.06058400000000001	A	A	0.00011951573693094253	(30, 86)
18	T	129	Y	0.060562	A	A	0.00011909977923918872	(18, 129)
140	A	151	R	0.060552	A	A	0.00011891111262226965	(140, 151)
19	G	61	R	0.060526	A	A	0.00011842176174523283	(19, 61)
12	R	17	L	0.060502	A	A	0.00011797156576752595	(12, 17)
121	A	138	T	0.060411	A	A	0.00011627769614857219	(121, 138)
99	T	125	F	0.060381	A	A	0.00011572380591521566	(99, 125)
14	A	89	T	0.060361	A	A	0.00011535578687159658	(14, 89)
84	G	134	V	0.060254	A	A	0.00011340365471054473	(84, 134)
19	G	134	V	0.060246	A	A	0.00011325883068943964	(19, 134)
36	D	115	A	0.060216	A	A	0.00011271713319268091	(36, 115)
14	A	141	I	0.06020900000000001	A	A	0.00011259105297707834	(14, 141)
27	L	33	R	0.06018	A	A	0.00011206999082207317	(27, 33)
16	C	19	G	0.060173	A	A	0.00011194452331029656	(16, 19)
53	R	88	Y	0.060156	A	A	0.00011164031114866123	(53, 88)
93	L	99	T	0.060073	A	A	0.00011016506359960632	(93, 99)
65	L	101	W	0.06002	A	A	0.00010923169437046248	(65, 101)
49	I	103	S	0.060014	A	A	0.00010912645285510796	(49, 103)
46	G	124	L	0.059982000000000014	A	A	0.00010856661270025776	(46, 124)
22	L	139	Y	0.05986	A	A	0.00010645446276942271	(22, 139)
43	C	45	V	0.059741	A	A	0.0001044278616367956	(43, 45)
64	G	129	Y	0.059684	A	A	0.00010346876541334189	(64, 129)
100	R	115	A	0.05964600000000001	A	A	0.00010283351953831822	(100, 115)
59	W	80	N	0.059637	A	A	0.0001026835511622978	(59, 80)
32	A	97	L	0.059562	A	A	0.00010144099953946368	(32, 97)
32	A	59	W	0.059555	A	A	0.00010132568046969124	(32, 59)
55	F	139	Y	0.05952	A	A	0.00010075074870135956	(55, 139)
100	R	151	R	0.059465	A	A	9.985286621107465e-05	(100, 151)
124	L	127	V	0.05930700000000001	A	A	9.731109544668204e-05	(124, 127)
48	A	92	L	0.059305	A	A	9.727927580598145e-05	(48, 92)
11	V	111	L	0.05924500000000001	A	A	9.632877588884756e-05	(11, 111)
36	D	113	S	0.059189	A	A	9.5448752080201e-05	(36, 113)
134	V	138	T	0.059185	A	A	9.53861547226194e-05	(134, 138)
24	L	34	A	0.059163	A	A	9.504249055049301e-05	(24, 34)
39	Y	46	G	0.059137	A	A	9.46376948937703e-05	(39, 46)
125	F	140	A	0.059097	A	A	9.401778483282954e-05	(125, 140)
128	L	139	Y	0.059007	A	A	9.263555503299282e-05	(128, 139)
113	S	134	V	0.058923	A	A	9.136104806367375e-05	(113, 134)
121	A	130	D	0.058895	A	A	9.093952861446187e-05	(121, 130)
60	G	130	D	0.058846	A	A	9.020583518286476e-05	(60, 130)
18	T	109	S	0.058771	A	A	8.909255372851277e-05	(18, 109)
17	L	96	C	0.058743	A	A	8.867992517740281e-05	(17, 96)
38	D	43	C	0.05873200000000001	A	A	8.851826491696111e-05	(38, 43)
28	H	95	G	0.05873	A	A	8.848889899824803e-05	(28, 95)
124	L	140	A	0.058694	A	A	8.796172286778628e-05	(124, 140)
86	I	149	S	0.0586	A	A	8.659774317989569e-05	(86, 149)
62	G	115	A	0.058546	A	A	8.582232164903907e-05	(62, 115)
49	I	53	R	0.05850900000000001	A	A	8.529442005671004e-05	(49, 53)
12	R	94	L	0.05845	A	A	8.445832747647683e-05	(12, 94)
85	C	90	L	0.058449	A	A	8.444421653590893e-05	(85, 90)
14	A	39	Y	0.058425	A	A	8.410615323222687e-05	(14, 39)
99	T	137	T	0.058286	A	A	8.217069100147862e-05	(99, 137)
21	V	103	S	0.058241	A	A	8.155225527170851e-05	(21, 103)
14	A	140	A	0.058224	A	A	8.131965379582228e-05	(14, 140)
36	D	79	S	0.058220000000000015	A	A	8.1265005899606e-05	(36, 79)
44	D	146	M	0.05821000000000001	A	A	8.112852243412809e-05	(44, 146)
86	I	105	L	0.058208	A	A	8.110124908806347e-05	(86, 105)
20	L	107	L	0.0582	A	A	8.099223346723514e-05	(20, 107)
85	C	100	R	0.058188	A	A	8.082894312840895e-05	(85, 100)
15	L	33	R	0.058175	A	A	8.065236050569276e-05	(15, 33)
56	S	89	T	0.058136	A	A	8.012457490934278e-05	(56, 89)
103	S	137	T	0.058124	A	A	7.996277004402123e-05	(103, 137)
63	F	115	A	0.058054	A	A	7.902442273059511e-05	(63, 115)
19	G	84	G	0.057829999999999986	A	A	7.608423454669703e-05	(19, 84)
10	W	89	T	0.05780900000000001	A	A	7.58134170863544e-05	(10, 89)
24	L	148	L	0.057802	A	A	7.572332661711114e-05	(24, 148)
108	L	111	L	0.057789	A	A	7.555625681149764e-05	(108, 111)
40	R	92	L	0.057761	A	A	7.519747655936034e-05	(40, 92)
16	C	34	A	0.057652	A	A	7.381453519397498e-05	(16, 34)
61	R	94	L	0.057611	A	A	7.329996518610906e-05	(61, 94)
59	W	84	G	0.057524	A	A	7.221815299232453e-05	(59, 84)
13	L	112	V	0.05745	A	A	7.13086901443438e-05	(13, 112)
142	N	146	M	0.057444	A	A	7.123537814593616e-05	(142, 146)
47	T	49	I	0.057375	A	A	7.039687999787242e-05	(47, 49)
28	H	64	G	0.057279	A	A	6.924422826228531e-05	(28, 64)
32	A	112	V	0.057271	A	A	6.914890190687501e-05	(32, 112)
100	R	109	S	0.057225	A	A	6.860293584725371e-05	(100, 109)
56	S	129	Y	0.05721	A	A	6.84256970918271e-05	(56, 129)
21	V	148	L	0.05719	A	A	6.818998396971317e-05	(21, 148)
87	F	92	L	0.057149	A	A	6.770892791080269e-05	(87, 92)
14	A	99	T	0.057147	A	A	6.768553570742268e-05	(14, 99)
107	L	113	S	0.057069000000000016	A	A	6.677857938455226e-05	(107, 113)
24	L	46	G	0.057028	A	A	6.63060008542e-05	(24, 46)
49	I	130	D	0.056766	A	A	6.335269385137856e-05	(49, 130)
97	L	109	S	0.056754	A	A	6.322015109271096e-05	(97, 109)
32	A	41	A	0.056696	A	A	6.25828457088934e-05	(32, 41)
57	S	92	L	0.05667100000000001	A	A	6.230983438526099e-05	(57, 92)
28	H	79	S	0.05665	A	A	6.208128800871188e-05	(28, 79)
37	R	119	Y	0.056612	A	A	6.166953933408618e-05	(37, 119)
21	V	39	Y	0.056582000000000014	A	A	6.134611690385372e-05	(21, 39)
94	L	100	R	0.05656	A	A	6.110985809222866e-05	(94, 100)
89	T	98	R	0.056544	A	A	6.093851985687269e-05	(89, 98)
56	S	61	R	0.056542	A	A	6.0917131328173095e-05	(56, 61)
100	R	102	A	0.056523	A	A	6.071425848213301e-05	(100, 102)
14	A	148	L	0.056507	A	A	6.0543864085430886e-05	(14, 148)
110	S	117	S	0.056494	A	A	6.040571823722294e-05	(110, 117)
105	L	127	V	0.056343	A	A	5.882063775089624e-05	(105, 127)
12	R	102	A	0.0563	A	A	5.8375783188307396e-05	(12, 102)
100	R	106	M	0.056192	A	A	5.727107569804326e-05	(100, 106)
60	G	134	V	0.056181	A	A	5.715956401974922e-05	(60, 134)
30	K	65	L	0.056167	A	A	5.701790727607318e-05	(30, 65)
51	C	132	C	0.056165	A	A	5.6997695002078955e-05	(51, 132)
29	V	55	F	0.056096000000000014	A	A	5.6304094614151625e-05	(29, 55)
100	R	145	L	0.056048	A	A	5.5825837180254335e-05	(100, 145)
62	G	65	L	0.056033000000000006	A	A	5.5677092536798105e-05	(62, 65)
86	I	92	L	0.055918	A	A	5.454787994640451e-05	(86, 92)
23	S	24	L	0.055814	A	A	5.354352245606233e-05	(23, 24)
22	L	62	G	0.055804	A	A	5.344778473522481e-05	(22, 62)
91	Q	142	N	0.055701	A	A	5.247013616356524e-05	(91, 142)
104	V	149	S	0.05562	A	A	5.171203937631611e-05	(104, 149)
40	R	125	F	0.055615	A	A	5.166555053220004e-05	(40, 125)
15	L	96	C	0.055521	A	A	5.079816014103767e-05	(15, 96)
88	Y	98	R	0.055437	A	A	5.0033568757898295e-05	(88, 98)
20	L	129	Y	0.0554	A	A	4.969990722067144e-05	(20, 129)
99	T	108	L	0.055377	A	A	4.9493452769616574e-05	(99, 108)
26	A	57	S	0.055368	A	A	4.9412865342918544e-05	(26, 57)
88	Y	118	V	0.055359000000000005	A	A	4.9332389716101676e-05	(88, 118)
41	A	48	A	0.055338	A	A	4.914504731967235e-05	(41, 48)
20	L	30	K	0.055178	A	A	4.7737471431578386e-05	(20, 30)
97	L	111	L	0.055177	A	A	4.77287832887866e-05	(97, 111)
62	G	143	V	0.055102	A	A	4.708100055781882e-05	(62, 143)
47	T	134	V	0.055082000000000006	A	A	4.690952932238496e-05	(47, 134)
128	L	148	L	0.055052	A	A	4.665332045799208e-05	(128, 148)
58	R	103	S	0.055027	A	A	4.644072499224514e-05	(58, 103)
30	K	88	Y	0.055022	A	A	4.639830512865485e-05	(30, 88)
46	G	139	Y	0.054947	A	A	4.576595872154594e-05	(46, 139)
23	S	113	S	0.054945000000000015	A	A	4.574919722113844e-05	(23, 113)
86	I	104	V	0.054938	A	A	4.569057316927392e-05	(86, 104)
61	R	148	L	0.054937	A	A	4.568220353418808e-05	(61, 148)
17	L	93	L	0.054893	A	A	4.531523102434513e-05	(17, 93)
19	G	128	L	0.054861	A	A	4.5049922983139084e-05	(19, 128)
10	W	100	R	0.054789	A	A	4.445781728195876e-05	(10, 100)
95	G	102	A	0.054723	A	A	4.3920895134557426e-05	(95, 102)
17	L	119	Y	0.054657	A	A	4.338951188632901e-05	(17, 119)
62	G	121	A	0.05464	A	A	4.3253531815567455e-05	(62, 121)
55	F	61	R	0.054591	A	A	4.2863620735431764e-05	(55, 61)
42	L	109	S	0.054529	A	A	4.237456317038325e-05	(42, 109)
94	L	129	Y	0.054470000000000005	A	A	4.191359704152401e-05	(94, 129)
16	C	82	I	0.054429999999999985	A	A	4.160351649924273e-05	(16, 82)
110	S	144	S	0.054389	A	A	4.128771693915808e-05	(110, 144)
101	W	115	A	0.054388	A	A	4.128004013074611e-05	(101, 115)
34	A	149	S	0.054358	A	A	4.1050301411522025e-05	(34, 149)
43	C	149	S	0.05428	A	A	4.045807927317825e-05	(43, 149)
14	A	17	L	0.054254	A	A	4.026229897946673e-05	(14, 17)
88	Y	116	G	0.05422	A	A	4.000749879547677e-05	(88, 116)
111	L	122	W	0.05419	A	A	3.9783819043736874e-05	(111, 122)
18	T	28	H	0.054180999999999986	A	A	3.971692358154549e-05	(18, 28)
133	I	143	V	0.054171	A	A	3.9642707893143874e-05	(133, 143)
9	G	86	I	0.054016	A	A	3.850740730555004e-05	(9, 86)
35	R	147	W	0.053949	A	A	3.8025324837776004e-05	(35, 147)
79	S	136	I	0.053924	A	A	3.784676807219958e-05	(79, 136)
98	R	133	I	0.053892	A	A	3.7619260297465636e-05	(98, 133)
19	G	23	S	0.053812	A	A	3.705559284732853e-05	(19, 23)
87	F	112	V	0.053793	A	A	3.692278674833985e-05	(87, 112)
99	T	149	S	0.053728	A	A	3.647151899309581e-05	(99, 149)
100	R	150	F	0.053722000000000006	A	A	3.6430102000662076e-05	(100, 150)
64	G	91	Q	0.053644	A	A	3.5895325123300936e-05	(64, 91)
27	L	55	F	0.053633000000000014	A	A	3.582045007865587e-05	(27, 55)
25	Y	39	Y	0.053579	A	A	3.5454813374593545e-05	(25, 39)
42	L	148	L	0.053574	A	A	3.5421119971733786e-05	(42, 148)
83	F	95	G	0.053505	A	A	3.4958936479555604e-05	(83, 95)
100	R	122	W	0.053491	A	A	3.486579154917856e-05	(100, 122)
50	S	131	F	0.053464	A	A	3.4686753504204276e-05	(50, 131)
56	S	104	V	0.053437	A	A	3.450850148486837e-05	(56, 104)
140	A	141	I	0.053383000000000014	A	A	3.4154344204624843e-05	(140, 141)
42	L	150	F	0.053378	A	A	3.412170953249245e-05	(42, 150)
53	R	59	W	0.05328	A	A	3.348742721427359e-05	(53, 59)
89	T	96	C	0.053229999999999986	A	A	3.316771445729726e-05	(89, 96)
89	T	97	L	0.053193	A	A	3.2932809791343765e-05	(89, 97)
115	A	122	W	0.053193	A	A	3.2932809791343765e-05	(115, 122)
114	L	148	L	0.053166	A	A	3.276229159575194e-05	(114, 148)
45	V	104	V	0.052984	A	A	3.163243859091242e-05	(45, 104)
29	V	85	C	0.05297	A	A	3.154692415530435e-05	(29, 85)
25	Y	26	A	0.052961	A	A	3.149205502723617e-05	(25, 26)
42	L	111	L	0.052895000000000005	A	A	3.109216880883436e-05	(42, 111)
109	S	139	Y	0.052836	A	A	3.0738378295973786e-05	(109, 139)
64	G	134	V	0.05281	A	A	3.058356688190198e-05	(64, 134)
101	W	133	I	0.052757000000000005	A	A	3.0270053740343786e-05	(101, 133)
141	I	149	S	0.05275	A	A	3.022885257346108e-05	(141, 149)
17	L	151	R	0.052748	A	A	3.0217089624954585e-05	(17, 151)
123	I	139	Y	0.052730999999999986	A	A	3.01172625280534e-05	(123, 139)
88	Y	130	D	0.052716	A	A	3.002941417937135e-05	(88, 130)
118	V	146	M	0.052686	A	A	2.985437482564967e-05	(118, 146)
22	L	143	V	0.052671	A	A	2.9767182921932167e-05	(22, 143)
13	L	93	L	0.052652	A	A	2.965705261941858e-05	(13, 93)
30	K	83	F	0.052629	A	A	2.9524203484336034e-05	(30, 83)
45	V	97	L	0.052588	A	A	2.928864782612132e-05	(45, 97)
18	T	89	T	0.052547	A	A	2.90547018194786e-05	(18, 89)
65	L	144	S	0.052518	A	A	2.8890194802135234e-05	(65, 144)
54	V	122	W	0.0525	A	A	2.8788488365088477e-05	(54, 122)
20	L	87	F	0.052473	A	A	2.863650318527995e-05	(20, 87)
16	C	64	G	0.052472000000000005	A	A	2.8630887315538646e-05	(16, 64)
59	W	146	M	0.052468	A	A	2.8608433259123363e-05	(59, 146)
55	F	138	T	0.052455	A	A	2.8535561608833295e-05	(55, 138)
39	Y	125	F	0.052428	A	A	2.8384720165951655e-05	(39, 125)
32	A	38	D	0.052399	A	A	2.822346579741876e-05	(32, 38)
19	G	22	L	0.052351	A	A	2.7958284570846253e-05	(19, 22)
101	W	122	W	0.052229	A	A	2.729386008772457e-05	(101, 122)
31	A	119	Y	0.052160000000000005	A	A	2.6924098244717315e-05	(31, 119)
13	L	35	R	0.052147000000000006	A	A	2.685491525469473e-05	(13, 35)
21	V	40	R	0.052117	A	A	2.6695842799980343e-05	(21, 40)
63	F	136	I	0.052054	A	A	2.6364414687293145e-05	(63, 136)
103	S	116	G	0.052023	A	A	2.62026285803186e-05	(103, 116)
34	A	79	S	0.051994000000000005	A	A	2.605205065582272e-05	(34, 79)
43	C	52	S	0.051993	A	A	2.6046871558063463e-05	(43, 52)
106	M	121	A	0.051993	A	A	2.6046871558063463e-05	(106, 121)
118	V	129	Y	0.051959000000000005	A	A	2.587130603047506e-05	(118, 129)
86	I	97	L	0.05189	A	A	2.5518124376660682e-05	(86, 97)
35	R	145	L	0.051773	A	A	2.492868598357801e-05	(35, 145)
23	S	63	F	0.051758000000000005	A	A	2.485396731916551e-05	(23, 63)
55	F	57	S	0.051730999999999985	A	A	2.4719957117563754e-05	(55, 57)
116	G	122	W	0.051722	A	A	2.4675424831855265e-05	(116, 122)
30	K	41	A	0.051719000000000015	A	A	2.4660596017575918e-05	(30, 41)
21	V	119	Y	0.051641999999999987	A	A	2.4282593588519753e-05	(21, 119)
103	S	108	L	0.051637	A	A	2.425822058790533e-05	(103, 108)
58	R	101	W	0.051599	A	A	2.407366981508148e-05	(58, 101)
23	S	97	L	0.051528	A	A	2.373207359162053e-05	(23, 97)
31	A	104	V	0.0515	A	A	2.359850631569844e-05	(31, 104)
26	A	135	C	0.051454	A	A	2.338047288521513e-05	(26, 135)
107	L	147	W	0.051411	A	A	2.317822262614963e-05	(107, 147)
42	L	62	G	0.051367	A	A	2.2972823019684823e-05	(42, 62)
117	S	144	S	0.051346	A	A	2.287534272844425e-05	(117, 144)
83	F	120	L	0.051320000000000005	A	A	2.275514428688768e-05	(83, 120)
21	V	22	L	0.05131	A	A	2.2709058502401544e-05	(21, 22)
19	G	30	K	0.051306	A	A	2.269064660569529e-05	(19, 30)
46	G	133	I	0.051194	A	A	2.218028307552732e-05	(46, 133)
106	M	116	G	0.051184	A	A	2.2135197429302386e-05	(106, 116)
111	L	147	W	0.051061	A	A	2.1587038632184686e-05	(111, 147)
84	G	117	S	0.051047	A	A	2.1525391034009512e-05	(84, 117)
36	D	64	G	0.05097	A	A	2.1189021079559146e-05	(36, 64)
53	R	79	S	0.05089	A	A	2.084433127902135e-05	(53, 79)
45	V	95	G	0.050873	A	A	2.0771707715469434e-05	(45, 95)
22	L	131	F	0.050865	A	A	2.073760710070824e-05	(22, 131)
12	R	39	Y	0.050832	A	A	2.059744922930611e-05	(12, 39)
16	C	23	S	0.050673	A	A	1.993347600234165e-05	(16, 23)
109	S	134	V	0.05066	A	A	1.9880010714744467e-05	(109, 134)
82	I	143	V	0.050633	A	A	1.9769360537467692e-05	(82, 143)
47	T	91	Q	0.050599	A	A	1.9630775476639568e-05	(47, 91)
38	D	119	Y	0.050421	A	A	1.891876922287168e-05	(38, 119)
20	L	32	A	0.050408	A	A	1.8867649084529683e-05	(20, 32)
54	V	145	L	0.050311	A	A	1.848994389228436e-05	(54, 145)
120	L	129	Y	0.050306	A	A	1.847065181478333e-05	(120, 129)
27	L	32	A	0.050133	A	A	1.7813704807163695e-05	(27, 32)
119	Y	134	V	0.050115	A	A	1.7746519400388228e-05	(119, 134)
25	Y	121	A	0.050103	A	A	1.7701850148995607e-05	(25, 121)
38	D	129	Y	0.050097	A	A	1.767955176432663e-05	(38, 129)
141	I	147	W	0.050067	A	A	1.7568421387432142e-05	(141, 147)
118	V	134	V	0.049996	A	A	1.7307800688436013e-05	(118, 134)
60	G	135	C	0.049978	A	A	1.724225812820455e-05	(60, 135)
90	L	119	Y	0.049936	A	A	1.7090154219620493e-05	(90, 119)
40	R	144	S	0.049866	A	A	1.6839209294448172e-05	(40, 144)
51	C	60	G	0.049836	A	A	1.6732634726431335e-05	(51, 60)
34	A	61	R	0.049836	A	A	1.6732634726431335e-05	(34, 61)
96	C	136	I	0.049745	A	A	1.6412896670140605e-05	(96, 136)
13	L	143	V	0.04973	A	A	1.6360700025636215e-05	(13, 143)
58	R	83	F	0.049699	A	A	1.6253278924033445e-05	(58, 83)
14	A	83	F	0.049696	A	A	1.624291558225209e-05	(14, 83)
116	G	133	I	0.049608	A	A	1.5941440544626548e-05	(116, 133)
13	L	104	V	0.049553	A	A	1.575547188894461e-05	(13, 104)
50	S	81	S	0.049529	A	A	1.5674908350316032e-05	(50, 81)
98	R	110	S	0.049505	A	A	1.559469926255552e-05	(98, 110)
83	F	138	T	0.049501	A	A	1.5581365450996693e-05	(83, 138)
18	T	140	A	0.049395	A	A	1.523157334228944e-05	(18, 140)
60	G	84	G	0.049355	A	A	1.5101342797656287e-05	(60, 84)
56	S	60	G	0.049328	A	A	1.5013979559998435e-05	(56, 60)
99	T	117	S	0.049327	A	A	1.5010752250496009e-05	(99, 117)
92	L	109	S	0.049296	A	A	1.4911001158874996e-05	(92, 109)
9	G	98	R	0.049237	A	A	1.4722726749239792e-05	(9, 98)
28	H	30	K	0.049211000000000005	A	A	1.4640409764885669e-05	(28, 30)
104	V	145	L	0.049206	A	A	1.4624625051784107e-05	(104, 145)
17	L	34	A	0.049185	A	A	1.4558489023937925e-05	(17, 34)
24	L	143	V	0.049159	A	A	1.4476962944873545e-05	(24, 143)
83	F	115	A	0.048998	A	A	1.3980821414471933e-05	(83, 115)
108	L	129	Y	0.048987	A	A	1.3947464297451206e-05	(108, 129)
13	L	20	L	0.048967	A	A	1.3886990446447338e-05	(13, 20)
45	V	91	Q	0.048956	A	A	1.3853826118195386e-05	(45, 91)
14	A	92	L	0.048856	A	A	1.3555445439030365e-05	(14, 92)
89	T	129	Y	0.048741	A	A	1.3219161612499365e-05	(89, 129)
65	L	86	I	0.048737	A	A	1.3207595240195945e-05	(65, 86)
101	W	104	V	0.048717	A	A	1.3149893981898638e-05	(101, 104)
50	S	122	W	0.048566000000000005	A	A	1.2721211377517903e-05	(50, 122)
17	L	148	L	0.048545	A	A	1.2662557415260222e-05	(17, 148)
30	K	146	M	0.048281	A	A	1.1944823441019795e-05	(30, 146)
60	G	120	L	0.048274	A	A	1.1926279987175032e-05	(60, 120)
40	R	52	S	0.048253	A	A	1.187079837308617e-05	(40, 52)
11	V	14	A	0.048245	A	A	1.1849721097774335e-05	(11, 14)
11	V	33	R	0.048235	A	A	1.1823419857999393e-05	(11, 33)
46	G	98	R	0.048234	A	A	1.1820792502887496e-05	(46, 98)
65	L	106	M	0.04822	A	A	1.1784062321466648e-05	(65, 106)
13	L	46	G	0.048213	A	A	1.1765734140772794e-05	(13, 46)
63	F	145	L	0.048206	A	A	1.1747430530231907e-05	(63, 145)
53	R	133	I	0.048187	A	A	1.169787293857214e-05	(53, 133)
106	M	112	V	0.048161	A	A	1.1630349304016068e-05	(106, 112)
15	L	19	G	0.048151	A	A	1.160446826460039e-05	(15, 19)
51	C	55	F	0.048126	A	A	1.1539982712721906e-05	(51, 55)
37	R	52	S	0.048093	A	A	1.1455334844194028e-05	(37, 52)
131	F	144	S	0.048093	A	A	1.1455334844194028e-05	(131, 144)
60	G	132	C	0.048079	A	A	1.1419585634693272e-05	(60, 132)
23	S	139	Y	0.048061	A	A	1.137376369295392e-05	(23, 139)
104	V	115	A	0.048056	A	A	1.1361063536638173e-05	(104, 115)
82	I	86	I	0.048047	A	A	1.133823405712148e-05	(82, 86)
14	A	40	R	0.048028	A	A	1.1290168312732989e-05	(14, 40)
35	R	59	W	0.047994	A	A	1.1204594215571913e-05	(35, 59)
46	G	51	C	0.047986	A	A	1.1184540590801897e-05	(46, 51)
84	G	101	W	0.04798	A	A	1.1169520684243688e-05	(84, 101)
37	R	59	W	0.047952	A	A	1.1099657473344265e-05	(37, 59)
38	D	108	L	0.047914	A	A	1.1005445886985758e-05	(38, 108)
24	L	98	R	0.047912	A	A	1.1000506539659457e-05	(24, 98)
21	V	86	I	0.047847	A	A	1.0841014768506849e-05	(21, 86)
84	G	139	Y	0.047844	A	A	1.0833702004325436e-05	(84, 139)
10	W	53	R	0.047839	A	A	1.0821523515970194e-05	(10, 53)
35	R	93	L	0.047775	A	A	1.066667833024696e-05	(35, 93)
95	G	103	S	0.047717	A	A	1.052800413009606e-05	(95, 103)
16	C	133	I	0.047692	A	A	1.0468712036296258e-05	(16, 133)
32	A	131	F	0.047667	A	A	1.0409708176542329e-05	(32, 131)
57	S	106	M	0.047535	A	A	1.0102899720785907e-05	(57, 106)
49	I	117	S	0.047535	A	A	1.0102899720785907e-05	(49, 117)
104	V	140	A	0.047506	A	A	1.0036550212624507e-05	(104, 140)
14	A	21	V	0.047492	A	A	1.000465420226564e-05	(14, 21)
58	R	90	L	0.047413	A	A	9.826303671247508e-06	(58, 90)
38	D	90	L	0.047407	A	A	9.81287088363898e-06	(38, 90)
104	V	147	W	0.047365	A	A	9.719284269048372e-06	(104, 147)
44	D	133	I	0.047341	A	A	9.666152829409633e-06	(44, 133)
131	F	151	R	0.047329	A	A	9.63968124141501e-06	(131, 151)
144	S	151	R	0.047256	A	A	9.479989763479414e-06	(144, 151)
57	S	89	T	0.04723	A	A	9.423667498747786e-06	(57, 89)
26	A	39	Y	0.047225	A	A	9.412869473598765e-06	(26, 39)
29	V	130	D	0.047209	A	A	9.378387532456187e-06	(29, 130)
87	F	108	L	0.047181	A	A	9.31830647232042e-06	(87, 108)
34	A	118	V	0.047146	A	A	9.243672634914877e-06	(34, 118)
18	T	133	I	0.047144	A	A	9.23942347707632e-06	(18, 133)
115	A	151	R	0.04714	A	A	9.23093022007617e-06	(115, 151)
80	N	131	F	0.047097	A	A	9.140052541583977e-06	(80, 131)
101	W	131	F	0.047086	A	A	9.116929229276332e-06	(101, 131)
47	T	112	V	0.047049	A	A	9.0395210906895e-06	(47, 112)
36	D	57	S	0.047026	A	A	8.991689105695453e-06	(36, 57)
50	S	83	F	0.046949	A	A	8.833142944680583e-06	(50, 83)
13	L	28	H	0.046925	A	A	8.78422213609145e-06	(13, 28)
41	A	63	F	0.046876	A	A	8.68506826739431e-06	(41, 63)
62	G	104	V	0.046874	A	A	8.681041790118589e-06	(62, 104)
33	R	38	D	0.046822	A	A	8.576917777401217e-06	(33, 38)
114	L	124	L	0.046752	A	A	8.43845553289124e-06	(114, 124)
17	L	63	F	0.046709	A	A	8.354361182225038e-06	(17, 63)
58	R	100	R	0.046631	A	A	8.203664784716017e-06	(58, 100)
82	I	100	R	0.046497	A	A	7.950256172564207e-06	(82, 100)
96	C	101	W	0.046428	A	A	7.822429294175626e-06	(96, 101)
27	L	127	V	0.046395	A	A	7.761925369411095e-06	(27, 127)
13	L	106	M	0.046393	A	A	7.758271503428702e-06	(13, 106)
33	R	80	N	0.046354	A	A	7.687317709345292e-06	(33, 80)
37	R	113	S	0.046307	A	A	7.602555298540183e-06	(37, 113)
15	L	89	T	0.046284	A	A	7.561371136552727e-06	(15, 89)
32	A	79	S	0.046267	A	A	7.531054783456755e-06	(32, 79)
79	S	93	L	0.046252	A	A	7.504392396782062e-06	(79, 93)
111	L	113	S	0.046221	A	A	7.44954866536852e-06	(111, 113)
133	I	150	F	0.046199	A	A	7.410837886971192e-06	(133, 150)
65	L	135	C	0.046198	A	A	7.409082447164079e-06	(65, 135)
80	N	117	S	0.046177	A	A	7.372301183461317e-06	(80, 117)
146	M	147	W	0.046174	A	A	7.367059629531372e-06	(146, 147)
26	A	132	C	0.046167	A	A	7.3548418684760055e-06	(26, 132)
96	C	134	V	0.046141	A	A	7.309614897621832e-06	(96, 134)
108	L	113	S	0.046099	A	A	7.2370639979612675e-06	(108, 113)
44	D	124	L	0.046065	A	A	7.178789311379131e-06	(44, 124)
37	R	102	A	0.046057	A	A	7.165136758610117e-06	(37, 102)
58	R	91	Q	0.046053	A	A	7.158318908294267e-06	(58, 91)
20	L	119	Y	0.045949	A	A	6.983013440457109e-06	(20, 119)
90	L	136	I	0.045941	A	A	6.969683611856676e-06	(90, 136)
106	M	145	L	0.04594	A	A	6.968018932173483e-06	(106, 145)
19	G	108	L	0.04587	A	A	6.852342807630946e-06	(19, 108)
50	S	85	C	0.04585	A	A	6.8195992468248635e-06	(50, 85)
12	R	36	D	0.045811	A	A	6.7561385354788295e-06	(12, 36)
31	A	128	L	0.045771	A	A	6.691582115977135e-06	(31, 128)
30	K	36	D	0.045761	A	A	6.675526675424605e-06	(30, 36)
65	L	116	G	0.045718	A	A	6.606867574147759e-06	(65, 116)
40	R	81	S	0.045566	A	A	6.369040361252011e-06	(40, 81)
64	G	145	L	0.045557	A	A	6.355193982939225e-06	(64, 145)
141	I	143	V	0.045541000000000005	A	A	6.330642539921409e-06	(141, 143)
16	C	88	Y	0.045498	A	A	6.265067000478589e-06	(16, 88)
61	R	149	S	0.045468	A	A	6.2196656728224604e-06	(61, 149)
111	L	133	I	0.045385	A	A	6.095536600284065e-06	(111, 133)
15	L	102	A	0.045374	A	A	6.079247879933848e-06	(15, 102)
91	Q	150	F	0.045373	A	A	6.07776895817317e-06	(91, 150)
32	A	110	S	0.045317	A	A	5.995445040518644e-06	(32, 110)
10	W	47	T	0.045253	A	A	5.902544769309152e-06	(10, 47)
33	R	36	D	0.045247	A	A	5.893899650635032e-06	(33, 36)
111	L	150	F	0.045246	A	A	5.892459864401716e-06	(111, 150)
31	A	117	S	0.045245	A	A	5.891020382847041e-06	(31, 117)
33	R	44	D	0.045175	A	A	5.791010589175688e-06	(33, 44)
104	V	131	F	0.045124	A	A	5.719075682591577e-06	(104, 131)
92	L	95	G	0.045087	A	A	5.667373405617773e-06	(92, 95)
105	L	129	Y	0.045036	A	A	5.596772208328485e-06	(105, 129)
52	S	107	L	0.045028	A	A	5.5857669564240255e-06	(52, 107)
118	V	149	S	0.044964	A	A	5.498397974176474e-06	(118, 149)
20	L	96	C	0.044945	A	A	5.472689394360673e-06	(20, 96)
25	Y	27	L	0.044932	A	A	5.455159399256335e-06	(25, 27)
29	V	133	I	0.044888	A	A	5.396187715733695e-06	(29, 133)
65	L	124	L	0.044872	A	A	5.3748808975782936e-06	(65, 124)
59	W	130	D	0.044797	A	A	5.2759743686356145e-06	(59, 130)
98	R	143	V	0.044727	A	A	5.185089110027269e-06	(98, 143)
98	R	129	Y	0.044713	A	A	5.167075877327794e-06	(98, 129)
47	T	118	V	0.044711	A	A	5.1645069929941425e-06	(47, 118)
43	C	44	D	0.044706	A	A	5.158089626396664e-06	(43, 44)
126	F	138	T	0.044657	A	A	5.09556442477403e-06	(126, 138)
16	C	17	L	0.044603	A	A	5.027421346695666e-06	(16, 17)
24	L	108	L	0.044566	A	A	4.98118826321033e-06	(24, 108)
105	L	144	S	0.044518	A	A	4.92175999749446e-06	(105, 144)
96	C	100	R	0.044499	A	A	4.898406770042516e-06	(96, 100)
9	G	83	F	0.044487	A	A	4.883706937519413e-06	(9, 83)
65	L	130	D	0.044466000000000006	A	A	4.858074291467049e-06	(65, 130)
21	V	37	R	0.044383	A	A	4.757902965377032e-06	(21, 37)
31	A	40	R	0.044382	A	A	4.756707091820169e-06	(31, 40)
83	F	142	N	0.044378	A	A	4.751926204955629e-06	(83, 142)
36	D	109	S	0.044372	A	A	4.744762691500576e-06	(36, 109)
62	G	127	V	0.044367	A	A	4.738800255838125e-06	(62, 127)
98	R	137	T	0.044362	A	A	4.732844321900026e-06	(98, 137)
29	V	50	S	0.044331	A	A	4.6960622873134885e-06	(29, 50)
110	S	139	Y	0.044304	A	A	4.664228666798281e-06	(110, 139)
125	F	137	T	0.044298	A	A	4.65718001283024e-06	(125, 137)
15	L	25	Y	0.044254	A	A	4.6057717077114035e-06	(15, 25)
97	L	116	G	0.044211	A	A	4.556008280899846e-06	(97, 116)
95	G	150	F	0.044203	A	A	4.546801635663431e-06	(95, 150)
98	R	118	V	0.04419	A	A	4.531875272659442e-06	(98, 118)
81	S	96	C	0.044153	A	A	4.4896250715689946e-06	(81, 96)
92	L	142	N	0.044143	A	A	4.478264954528978e-06	(92, 142)
28	H	54	V	0.044126	A	A	4.459010008334774e-06	(28, 54)
29	V	109	S	0.044124	A	A	4.456749451971904e-06	(29, 109)
84	G	85	C	0.044017	A	A	4.337250639775961e-06	(84, 85)
96	C	111	L	0.044001	A	A	4.31962293460028e-06	(96, 111)
48	A	129	Y	0.043924	A	A	4.235656741418937e-06	(48, 129)
33	R	148	L	0.043906	A	A	4.216233927963736e-06	(33, 148)
43	C	115	A	0.043904	A	A	4.214080619145116e-06	(43, 115)
97	L	147	W	0.043877	A	A	4.1851042764025336e-06	(97, 147)
46	G	114	L	0.043876	A	A	4.184034409645989e-06	(46, 114)
10	W	106	M	0.043856	A	A	4.162686892438944e-06	(10, 106)
96	C	140	A	0.043795	A	A	4.098160056458536e-06	(96, 140)
40	R	59	W	0.043762	A	A	4.063615575034724e-06	(40, 59)
38	D	56	S	0.043751	A	A	4.052157090369115e-06	(38, 56)
43	C	46	G	0.043695	A	A	3.994257037733252e-06	(43, 46)
11	V	144	S	0.043657	A	A	3.955378239564192e-06	(11, 144)
126	F	131	F	0.043643	A	A	3.9411375750611175e-06	(126, 131)
28	H	59	W	0.043625	A	A	3.922893613197951e-06	(28, 59)
123	I	141	I	0.043574	A	A	3.871600254114143e-06	(123, 141)
37	R	58	R	0.043554	A	A	3.851644864338539e-06	(37, 58)
18	T	132	C	0.043532	A	A	3.82979721614193e-06	(18, 132)
124	L	137	T	0.043509	A	A	3.807071708044935e-06	(124, 137)
86	I	151	R	0.043457	A	A	3.7561237960312088e-06	(86, 151)
54	V	58	R	0.043442	A	A	3.741537846591295e-06	(54, 58)
47	T	53	R	0.04339	A	A	3.69135363698903e-06	(47, 53)
45	V	63	F	0.043376	A	A	3.6779428785514763e-06	(45, 63)
45	V	50	S	0.04336	A	A	3.6626681699844117e-06	(45, 50)
12	R	46	G	0.043349	A	A	3.6521988206239235e-06	(12, 46)
37	R	49	I	0.043306	A	A	3.6115223551452415e-06	(37, 49)
11	V	90	L	0.043299	A	A	3.604938018098703e-06	(11, 90)
80	N	121	A	0.043257	A	A	3.5656507023322687e-06	(80, 121)
36	D	140	A	0.043235	A	A	3.5452205879048516e-06	(36, 140)
16	C	59	W	0.043181	A	A	3.4955048641691954e-06	(16, 59)
124	L	134	V	0.043161	A	A	3.4772460845313376e-06	(124, 134)
29	V	128	L	0.043141000000000006	A	A	3.4590702921097677e-06	(29, 128)
56	S	128	L	0.043109	A	A	3.430160844857378e-06	(56, 128)
31	A	65	L	0.043108	A	A	3.429260820589976e-06	(31, 65)
52	S	141	I	0.043054	A	A	3.3809634484218494e-06	(52, 141)
19	G	149	S	0.043013	A	A	3.344689375337955e-06	(19, 149)
80	N	102	A	0.042992	A	A	3.326241413048215e-06	(80, 102)
108	L	133	I	0.042991	A	A	3.325365150640122e-06	(108, 133)
89	T	140	A	0.042913	A	A	3.257632268251238e-06	(89, 140)
38	D	145	L	0.042905	A	A	3.250753653120823e-06	(38, 145)
23	S	82	I	0.042902	A	A	3.248177431939412e-06	(23, 82)
79	S	87	F	0.042899	A	A	3.2456029870567248e-06	(79, 87)
52	S	63	F	0.042864	A	A	3.215698698581201e-06	(52, 63)
84	G	112	V	0.042845	A	A	3.199565552188608e-06	(84, 112)
61	R	144	S	0.042835000000000005	A	A	3.1911027425926912e-06	(61, 144)
63	F	111	L	0.042828	A	A	3.185190369829296e-06	(63, 111)
57	S	120	L	0.042802	A	A	3.1633134891521423e-06	(57, 120)
97	L	131	F	0.042791	A	A	3.154097316282708e-06	(97, 131)
61	R	127	V	0.042785	A	A	3.1490801672305562e-06	(61, 127)
20	L	102	A	0.042771	A	A	3.1374004828865297e-06	(20, 102)
15	L	50	S	0.042739	A	A	3.110845509534473e-06	(15, 50)
26	A	54	V	0.042722	A	A	3.096817898126184e-06	(26, 54)
37	R	64	G	0.042706	A	A	3.083665756934192e-06	(37, 64)
84	G	91	Q	0.042704	A	A	3.08202516216138e-06	(84, 91)
33	R	134	V	0.04268	A	A	3.0623971928465617e-06	(33, 134)
137	T	150	F	0.042657	A	A	3.0436892301120738e-06	(137, 150)
86	I	107	L	0.042649	A	A	3.03720546937514e-06	(86, 107)
51	C	90	L	0.042589	A	A	2.988959247444693e-06	(51, 90)
32	A	52	S	0.042546	A	A	2.954794453401863e-06	(32, 52)
53	R	102	A	0.042477	A	A	2.9006821402331437e-06	(53, 102)
92	L	120	L	0.042422	A	A	2.858169123635383e-06	(92, 120)
105	L	118	V	0.042406	A	A	2.845904025025453e-06	(105, 118)
27	L	62	G	0.042387	A	A	2.831398766023185e-06	(27, 62)
35	R	82	I	0.042354	A	A	2.806358389475396e-06	(35, 82)
41	A	124	L	0.042307	A	A	2.771027817670315e-06	(41, 124)
61	R	116	G	0.042294	A	A	2.7613241876294737e-06	(61, 116)
15	L	88	Y	0.042287	A	A	2.756111424429343e-06	(15, 88)
102	A	144	S	0.042223	A	A	2.708847866011895e-06	(102, 144)
31	A	33	R	0.042202	A	A	2.6934941215305284e-06	(31, 33)
116	G	121	A	0.042182	A	A	2.6789420402193857e-06	(116, 121)
10	W	83	F	0.042076	A	A	2.602953678005558e-06	(10, 83)
17	L	85	C	0.042009	A	A	2.5558980265509308e-06	(17, 85)
83	F	128	L	0.042007	A	A	2.5545048502193018e-06	(83, 128)
39	Y	139	Y	0.042006	A	A	2.553808510235849e-06	(39, 139)
28	H	47	T	0.042005	A	A	2.5531123356630435e-06	(28, 47)
113	S	143	V	0.041983	A	A	2.537838276846964e-06	(113, 143)
52	S	89	T	0.041977	A	A	2.5336864697648647e-06	(52, 89)
43	C	49	I	0.041935	A	A	2.504789187367135e-06	(43, 49)
26	A	60	G	0.041895	A	A	2.477535434229981e-06	(26, 60)
63	F	126	F	0.041719	A	A	2.36066576850056e-06	(63, 126)
58	R	86	I	0.041705	A	A	2.3515792269687197e-06	(58, 86)
26	A	33	R	0.041698	A	A	2.347047402657461e-06	(26, 33)
47	T	97	L	0.041616	A	A	2.2945246447807584e-06	(47, 97)
33	R	104	V	0.041603	A	A	2.28629270572695e-06	(33, 104)
30	K	47	T	0.041556	A	A	2.2567455569677445e-06	(30, 47)
133	I	139	Y	0.041493	A	A	2.2176624801285214e-06	(133, 139)
94	L	99	T	0.041462	A	A	2.198648802261605e-06	(94, 99)
12	R	104	V	0.041457	A	A	2.1955954354677827e-06	(12, 104)
64	G	113	S	0.041449	A	A	2.1907177418985033e-06	(64, 113)
24	L	37	R	0.041439	A	A	2.1846339193430735e-06	(24, 37)
110	S	120	L	0.041428	A	A	2.1779587418794856e-06	(110, 120)
107	L	142	N	0.041386	A	A	2.152635076711203e-06	(107, 142)
40	R	103	S	0.041385000000000005	A	A	2.1520352766109085e-06	(40, 103)
58	R	65	L	0.041369	A	A	2.1424582842802532e-06	(58, 65)
16	C	149	S	0.041331	A	A	2.1198618084936302e-06	(16, 149)
17	L	114	L	0.041303	A	A	2.1033451010007647e-06	(17, 114)
62	G	82	I	0.041289	A	A	2.095128936860532e-06	(62, 82)
91	Q	102	A	0.041225	A	A	2.057924908294124e-06	(91, 102)
40	R	118	V	0.041218	A	A	2.0538909120825057e-06	(40, 118)
55	F	130	D	0.041183	A	A	2.0338242682894056e-06	(55, 130)
36	D	51	C	0.041178	A	A	2.030971618813084e-06	(36, 51)
107	L	114	L	0.041162	A	A	2.0218665929026004e-06	(107, 114)
111	L	137	T	0.041142000000000005	A	A	2.01053542340822e-06	(111, 137)
20	L	26	A	0.041108	A	A	1.9913996056522758e-06	(20, 26)
54	V	138	T	0.041073	A	A	1.9718672163336812e-06	(54, 138)
9	G	28	H	0.041066000000000005	A	A	1.967980870731365e-06	(9, 28)
60	G	103	S	0.040979	A	A	1.920234160334516e-06	(60, 103)
129	Y	132	C	0.040926	A	A	1.8916455324460003e-06	(129, 132)
10	W	25	Y	0.040921	A	A	1.888967777018535e-06	(10, 25)
60	G	87	F	0.040877	A	A	1.8655458848568915e-06	(60, 87)
17	L	137	T	0.040858	A	A	1.855510546207156e-06	(17, 137)
34	A	147	W	0.040855	A	A	1.853930336207489e-06	(34, 147)
81	S	88	Y	0.040733	A	A	1.7906559845366486e-06	(81, 88)
54	V	127	V	0.040675	A	A	1.7612421547042003e-06	(54, 127)
18	T	58	R	0.040661	A	A	1.7542058294530484e-06	(18, 58)
13	L	15	L	0.040658	A	A	1.7527012445554874e-06	(13, 15)
9	G	12	R	0.040627	A	A	1.7372197580383877e-06	(9, 12)
21	V	113	S	0.040625	A	A	1.7362250679617417e-06	(21, 113)
46	G	54	V	0.040594	A	A	1.7208708741023418e-06	(46, 54)
59	W	104	V	0.040582	A	A	1.7149592438802014e-06	(59, 104)
52	S	125	F	0.040537	A	A	1.6929483599751862e-06	(52, 125)
52	S	123	I	0.040522	A	A	1.6856664605563885e-06	(52, 123)
16	C	45	V	0.040493	A	A	1.6716656955106863e-06	(16, 45)
23	S	146	M	0.040479	A	A	1.6649431532977385e-06	(23, 146)
28	H	39	Y	0.040448000000000005	A	A	1.6501415404725288e-06	(28, 39)
88	Y	135	C	0.04038	A	A	1.6180756866886762e-06	(88, 135)
117	S	129	Y	0.04038	A	A	1.6180756866886762e-06	(117, 129)
52	S	131	F	0.040345	A	A	1.6017845336561545e-06	(52, 131)
88	Y	133	I	0.040303	A	A	1.5824245527055098e-06	(88, 133)
19	G	145	L	0.040297	A	A	1.5796756082302648e-06	(19, 145)
120	L	134	V	0.040294	A	A	1.5783027021715926e-06	(120, 134)
45	V	148	L	0.040289	A	A	1.5760168433453104e-06	(45, 148)
29	V	65	L	0.040253	A	A	1.5596439224452312e-06	(29, 65)
40	R	107	L	0.040174	A	A	1.5242347653841948e-06	(40, 107)
16	C	30	K	0.040129000000000005	A	A	1.5043809096955083e-06	(16, 30)
12	R	13	L	0.040124	A	A	1.5021889486314437e-06	(12, 13)
11	V	20	L	0.040074	A	A	1.480422480719361e-06	(11, 20)
118	V	141	I	0.03997	A	A	1.4360299508753303e-06	(118, 141)
26	A	41	A	0.039943	A	A	1.4246971500584562e-06	(26, 41)
33	R	114	L	0.039938	A	A	1.4226070912668354e-06	(33, 114)
26	A	64	G	0.039936	A	A	1.4217718190919304e-06	(26, 64)
137	T	139	Y	0.039875	A	A	1.3965012439071353e-06	(137, 139)
120	L	139	Y	0.039856	A	A	1.3887107698009636e-06	(120, 139)
115	A	133	I	0.039827	A	A	1.376893354561615e-06	(115, 133)
58	R	129	Y	0.039698	A	A	1.3253858573737972e-06	(58, 129)
100	R	111	L	0.03969	A	A	1.3222478842521129e-06	(100, 111)
91	Q	126	F	0.039672000000000006	A	A	1.3152112086487403e-06	(91, 126)
64	G	116	G	0.039662	A	A	1.3113161245760208e-06	(64, 116)
136	I	148	L	0.039624	A	A	1.2966067313417818e-06	(136, 148)
17	L	37	R	0.039563	A	A	1.2732962067646179e-06	(17, 37)
23	S	79	S	0.039528	A	A	1.2600876475024095e-06	(23, 79)
29	V	59	W	0.039519	A	A	1.2567106125778342e-06	(29, 59)
27	L	83	F	0.039518	A	A	1.256335876047226e-06	(27, 83)
39	Y	138	T	0.039475	A	A	1.2403144697112206e-06	(39, 138)
100	R	129	Y	0.039441	A	A	1.2277733138293837e-06	(100, 129)
23	S	104	V	0.039405	A	A	1.214615603942476e-06	(23, 104)
18	T	135	C	0.039385	A	A	1.2073592554659238e-06	(18, 135)
86	I	145	L	0.039381	A	A	1.205912550230291e-06	(86, 145)
79	S	132	C	0.039361	A	A	1.1987017717210686e-06	(79, 132)
93	L	137	T	0.039319	A	A	1.1836819380216649e-06	(93, 137)
101	W	103	S	0.0393	A	A	1.176941579076878e-06	(101, 103)
83	F	110	S	0.039249	A	A	1.159014985606328e-06	(83, 110)
126	F	136	I	0.039124	A	A	1.116085119562698e-06	(126, 136)
18	T	108	L	0.039093	A	A	1.105656643287226e-06	(18, 108)
33	R	39	Y	0.03905	A	A	1.091332727125424e-06	(33, 39)
24	L	99	T	0.039047000000000005	A	A	1.090339480540571e-06	(24, 99)
102	A	118	V	0.038963	A	A	1.0628482684261124e-06	(102, 118)
10	W	129	Y	0.038908	A	A	1.0451789333316658e-06	(10, 129)
32	A	44	D	0.038866000000000005	A	A	1.0318598974877226e-06	(32, 44)
10	W	58	R	0.038817	A	A	1.016509267227974e-06	(10, 58)
12	R	91	Q	0.038805	A	A	1.012780590394336e-06	(12, 91)
95	G	135	C	0.038765	A	A	1.000438123758263e-06	(95, 135)
9	G	16	C	0.038656	A	A	9.674717264953078e-07	(9, 16)
96	C	147	W	0.038637	A	A	9.618238667379624e-07	(96, 147)
90	L	103	S	0.038584	A	A	9.462218486390976e-07	(90, 103)
107	L	137	T	0.038577	A	A	9.441778918035568e-07	(107, 137)
11	V	61	R	0.038575	A	A	9.435946158879623e-07	(11, 61)
34	A	100	R	0.038517	A	A	9.268165116189265e-07	(34, 100)
130	D	133	I	0.038435	A	A	9.035424314532127e-07	(130, 133)
36	D	48	A	0.03843	A	A	9.021400172302551e-07	(36, 48)
59	W	83	F	0.0384	A	A	8.937655667091766e-07	(59, 83)
16	C	29	V	0.038389	A	A	8.907120695174976e-07	(16, 29)
117	S	143	V	0.038386	A	A	8.898808878031393e-07	(117, 143)
53	R	58	R	0.038324	A	A	8.728548228703867e-07	(53, 58)
9	G	102	A	0.038302	A	A	8.668824063431665e-07	(9, 102)
47	T	56	S	0.038298	A	A	8.658003740546502e-07	(47, 56)
97	L	101	W	0.038255	A	A	8.542431662881185e-07	(97, 101)
10	W	108	L	0.038213	A	A	8.430856655029206e-07	(10, 108)
49	I	64	G	0.038194	A	A	8.380803883628581e-07	(49, 64)
81	S	87	F	0.038157	A	A	8.284080717665787e-07	(81, 87)
88	Y	123	I	0.038142	A	A	8.24514865158394e-07	(88, 123)
65	L	85	C	0.038139	A	A	8.237381541439327e-07	(65, 85)
38	D	96	C	0.038131	A	A	8.21670064044823e-07	(38, 96)
104	V	126	F	0.038128	A	A	8.20895706191829e-07	(104, 126)
129	Y	151	R	0.038125	A	A	8.201219890527065e-07	(129, 151)
12	R	92	L	0.038117000000000005	A	A	8.180618722854658e-07	(12, 92)
99	T	126	F	0.038075	A	A	8.073206169689174e-07	(99, 126)
43	C	147	W	0.038067	A	A	8.052887624984069e-07	(43, 147)
56	S	151	R	0.03806	A	A	8.035145742294691e-07	(56, 151)
16	C	113	S	0.037994	A	A	7.8695450003401e-07	(16, 113)
38	D	128	L	0.037967	A	A	7.802667862447806e-07	(38, 128)
60	G	83	F	0.037909	A	A	7.66069104560018e-07	(60, 83)
144	S	146	M	0.037888	A	A	7.609847989650691e-07	(144, 146)
40	R	142	N	0.037884	A	A	7.600197272049805e-07	(40, 142)
53	R	129	Y	0.037883	A	A	7.59778627287907e-07	(53, 129)
90	L	108	L	0.037834	A	A	7.480467106552073e-07	(90, 108)
38	D	48	A	0.03783	A	A	7.470960665263489e-07	(38, 48)
38	D	136	I	0.037806	A	A	7.414144545045094e-07	(38, 136)
56	S	94	L	0.037741	A	A	7.262169090769091e-07	(56, 94)
39	Y	49	I	0.03774	A	A	7.259852545980713e-07	(39, 49)
23	S	131	F	0.037717	A	A	7.206750884936205e-07	(23, 131)
40	R	43	C	0.037682	A	A	7.126598714296508e-07	(40, 43)
125	F	146	M	0.037677	A	A	7.115212582812013e-07	(125, 146)
51	C	113	S	0.037625	A	A	6.997740962627862e-07	(51, 113)
18	T	81	S	0.037624	A	A	6.995498697211338e-07	(18, 81)
31	A	150	F	0.037608	A	A	6.95970821453002e-07	(31, 150)
26	A	53	R	0.037604000000000005	A	A	6.950785776064583e-07	(26, 53)
87	F	131	F	0.03756	A	A	6.853300354986815e-07	(87, 131)
21	V	64	G	0.037551	A	A	6.833508851289536e-07	(21, 64)
80	N	112	V	0.037535	A	A	6.798447957632437e-07	(80, 112)
49	I	61	R	0.037527	A	A	6.780976873663044e-07	(49, 61)
26	A	30	K	0.03752	A	A	6.765722058240652e-07	(26, 30)
18	T	104	V	0.037519	A	A	6.763545262993993e-07	(18, 104)
15	L	117	S	0.037497	A	A	6.715811245348543e-07	(15, 117)
15	L	32	A	0.037471	A	A	6.659780273771917e-07	(15, 32)
106	M	150	F	0.037397	A	A	6.502550131762935e-07	(106, 150)
37	R	141	I	0.037341	A	A	6.385743742560418e-07	(37, 141)
11	V	93	L	0.037278	A	A	6.256545201505053e-07	(11, 93)
49	I	118	V	0.037274	A	A	6.248420286686832e-07	(49, 118)
34	A	60	G	0.037274	A	A	6.248420286686832e-07	(34, 60)
29	V	58	R	0.037272	A	A	6.24436130966126e-07	(29, 58)
89	T	131	F	0.037271	A	A	6.242332690748039e-07	(89, 131)
9	G	112	V	0.037251	A	A	6.201881828420418e-07	(9, 112)
24	L	26	A	0.037208	A	A	6.115692173594044e-07	(24, 26)
45	V	61	R	0.037169	A	A	6.038432969203373e-07	(45, 61)
83	F	129	Y	0.037165	A	A	6.030557698018201e-07	(83, 129)
33	R	139	Y	0.037113	A	A	5.928998122384239e-07	(33, 139)
105	L	150	F	0.037111	A	A	5.925122213893941e-07	(105, 150)
12	R	137	T	0.037063	A	A	5.832766564870261e-07	(12, 137)
96	C	137	T	0.037038	A	A	5.785168107549384e-07	(96, 137)
25	Y	28	H	0.037033	A	A	5.775689530046039e-07	(25, 28)
99	T	127	V	0.037027	A	A	5.764333273611669e-07	(99, 127)
93	L	106	M	0.037014	A	A	5.739795418501767e-07	(93, 106)
32	A	37	R	0.037006	A	A	5.724740918697444e-07	(32, 37)
42	L	89	T	0.036991	A	A	5.696607339931946e-07	(42, 89)
23	S	42	L	0.036975	A	A	5.666732335930131e-07	(23, 42)
81	S	132	C	0.03695	A	A	5.6203285819958e-07	(81, 132)
111	L	151	R	0.036945	A	A	5.611088059419573e-07	(111, 151)
12	R	32	A	0.036924	A	A	5.572423679023877e-07	(12, 32)
19	G	57	S	0.036877	A	A	5.486737497524125e-07	(19, 57)
106	M	108	L	0.036828	A	A	5.39864173666366e-07	(106, 108)
84	G	99	T	0.03677	A	A	5.295975896593865e-07	(84, 99)
81	S	89	T	0.036767	A	A	5.290712659282203e-07	(81, 89)
19	G	113	S	0.036714	A	A	5.198484904440354e-07	(19, 113)
39	Y	124	L	0.036708	A	A	5.188133743378293e-07	(39, 124)
25	Y	45	V	0.036655	A	A	5.097483603396445e-07	(25, 45)
130	D	132	C	0.036655	A	A	5.097483603396445e-07	(130, 132)
91	Q	149	S	0.036631	A	A	5.056895261951213e-07	(91, 149)
49	I	138	T	0.036496	A	A	4.833843713630201e-07	(49, 138)
61	R	86	I	0.036444	A	A	4.750267573271762e-07	(61, 86)
61	R	64	G	0.036434	A	A	4.7343419719168674e-07	(61, 64)
46	G	135	C	0.036406	A	A	4.6900001912035676e-07	(46, 135)
26	A	117	S	0.036405	A	A	4.6884233449917965e-07	(26, 117)
33	R	82	I	0.036395	A	A	4.672680548592782e-07	(33, 82)
38	D	61	R	0.036387	A	A	4.66011985618499e-07	(38, 61)
21	V	53	R	0.036305	A	A	4.533077423688344e-07	(21, 53)
126	F	133	I	0.036293	A	A	4.514744150945196e-07	(126, 133)
101	W	113	S	0.036239	A	A	4.4330503301855214e-07	(101, 113)
107	L	122	W	0.036168	A	A	4.3276216479822657e-07	(107, 122)
102	A	112	V	0.036138	A	A	4.283742606209903e-07	(102, 112)
38	D	110	S	0.036126	A	A	4.2663010786366356e-07	(38, 110)
34	A	53	R	0.036125	A	A	4.2648504471499774e-07	(34, 53)
81	S	95	G	0.0361	A	A	4.2287256568477147e-07	(81, 95)
81	S	114	L	0.036078	A	A	4.197159212754413e-07	(81, 114)
16	C	99	T	0.036041	A	A	4.1445383874502843e-07	(16, 99)
59	W	111	L	0.036013	A	A	4.1051046518815713e-07	(59, 111)
30	K	133	I	0.036007	A	A	4.0966977268784545e-07	(30, 133)
9	G	117	S	0.035973000000000005	A	A	4.049344544039053e-07	(9, 117)
25	Y	58	R	0.035964	A	A	4.0368909349964e-07	(25, 58)
102	A	108	L	0.035906	A	A	3.9574411942035226e-07	(102, 108)
47	T	83	F	0.035889	A	A	3.934417012470425e-07	(47, 83)
36	D	43	C	0.035887	A	A	3.9317160658762743e-07	(36, 43)
96	C	105	L	0.035848000000000005	A	A	3.8793733673449895e-07	(96, 105)
105	L	140	A	0.035836	A	A	3.863392030563839e-07	(105, 140)
9	G	142	N	0.035744	A	A	3.742784815355765e-07	(9, 142)
40	R	61	R	0.035742	A	A	3.7402002276167456e-07	(40, 61)
48	A	131	F	0.035738	A	A	3.7350357742843033e-07	(48, 131)
15	L	91	Q	0.035724	A	A	3.717009683656248e-07	(15, 91)
54	V	123	I	0.035681	A	A	3.662122684646844e-07	(54, 123)
62	G	135	C	0.035664999999999995	A	A	3.6418828704049137e-07	(62, 135)
22	L	96	C	0.035583	A	A	3.5396946837430763e-07	(22, 96)
53	R	65	L	0.035526	A	A	3.470160106774484e-07	(53, 65)
53	R	61	R	0.035523	A	A	3.4665340166748647e-07	(53, 61)
47	T	79	S	0.035517	A	A	3.4592918652549536e-07	(47, 79)
84	G	144	S	0.035439	A	A	3.3663514287619273e-07	(84, 144)
9	G	21	V	0.035429	A	A	3.35459683050169e-07	(9, 21)
79	S	104	V	0.035378	A	A	3.295210036373457e-07	(79, 104)
23	S	124	L	0.035367	A	A	3.2825234641063324e-07	(23, 124)
105	L	131	F	0.035247	A	A	3.146899335494805e-07	(105, 131)
20	L	35	R	0.035207	A	A	3.1028039303110516e-07	(20, 35)
60	G	117	S	0.035177	A	A	3.070091306527112e-07	(60, 117)
48	A	58	R	0.035174000000000004	A	A	3.066836854860166e-07	(48, 58)
15	L	143	V	0.035152	A	A	3.0430638096483945e-07	(15, 143)
99	T	105	L	0.035111	A	A	2.9991933745859923e-07	(99, 105)
21	V	99	T	0.035025	A	A	2.9089827093596136e-07	(21, 99)
14	A	149	S	0.035008	A	A	2.8914368449704516e-07	(14, 149)
9	G	139	Y	0.035001	A	A	2.884239291512539e-07	(9, 139)
29	V	46	G	0.034989	A	A	2.871937442145586e-07	(29, 46)
80	N	119	Y	0.03497	A	A	2.8525542901170715e-07	(80, 119)
18	T	125	F	0.034965	A	A	2.84747270710846e-07	(18, 125)
128	L	151	R	0.034927	A	A	2.809113283440737e-07	(128, 151)
34	A	129	Y	0.034899	A	A	2.781141294501673e-07	(34, 129)
83	F	147	W	0.034885	A	A	2.767247805587901e-07	(83, 147)
35	R	150	F	0.03488	A	A	2.7623007272320264e-07	(35, 150)
48	A	122	W	0.034876	A	A	2.7583486922604883e-07	(48, 122)
44	D	48	A	0.034819	A	A	2.7025724897264837e-07	(44, 48)
98	R	100	R	0.034744	A	A	2.6307022219681906e-07	(98, 100)
118	V	127	V	0.034709	A	A	2.5977447302437467e-07	(118, 127)
19	G	32	A	0.034703	A	A	2.592131667043725e-07	(19, 32)
9	G	131	F	0.034679	A	A	2.569786460476387e-07	(9, 131)
61	R	111	L	0.034647000000000004	A	A	2.5402577687872636e-07	(61, 111)
11	V	94	L	0.034632	A	A	2.526519740043713e-07	(11, 94)
35	R	56	S	0.03462	A	A	2.5155766466220634e-07	(35, 56)
50	S	126	F	0.034615	A	A	2.511029404596521e-07	(50, 126)
26	A	52	S	0.034606	A	A	2.5028626769974753e-07	(26, 52)
85	C	87	F	0.034563	A	A	2.464167064120668e-07	(85, 87)
99	T	113	S	0.034551	A	A	2.453463125738773e-07	(99, 113)
40	R	137	T	0.034495	A	A	2.4040530237995036e-07	(40, 137)
106	M	107	L	0.034453	A	A	2.3675749484312815e-07	(106, 107)
25	Y	117	S	0.03444	A	A	2.356383752339324e-07	(25, 117)
40	R	140	A	0.03442	A	A	2.3392578625710612e-07	(40, 140)
89	T	105	L	0.034419	A	A	2.338404465042134e-07	(89, 105)
126	F	130	D	0.034414	A	A	2.3341416059336273e-07	(126, 130)
99	T	112	V	0.034331	A	A	2.2643750426724647e-07	(99, 112)
108	L	149	S	0.034323	A	A	2.2577490334901568e-07	(108, 149)
57	S	142	N	0.034302	A	A	2.2404372844119525e-07	(57, 142)
20	L	122	W	0.034299	A	A	2.2379737870948115e-07	(20, 122)
99	T	111	L	0.034258	A	A	2.204545310524868e-07	(99, 111)
62	G	98	R	0.034247	A	A	2.1956521878995591e-07	(62, 98)
12	R	22	L	0.034189	A	A	2.1492839582572785e-07	(12, 22)
35	R	81	S	0.034148000000000005	A	A	2.117031207459749e-07	(35, 81)
22	L	65	L	0.034143	A	A	2.113127392770895e-07	(22, 65)
17	L	109	S	0.03407	A	A	2.0568526094471106e-07	(17, 109)
138	T	144	S	0.034066	A	A	2.0538077551418027e-07	(138, 144)
48	A	149	S	0.034005	A	A	2.0078654215523807e-07	(48, 149)
15	L	57	S	0.033995	A	A	2.0004213157089093e-07	(15, 57)
41	A	106	M	0.033962	A	A	1.9760287791313408e-07	(41, 106)
12	R	116	G	0.033946	A	A	1.9642971515367803e-07	(12, 116)
79	S	121	A	0.033772	A	A	1.8406403008636735e-07	(79, 121)
80	N	144	S	0.033769	A	A	1.8385701727262265e-07	(80, 144)
26	A	62	G	0.033763	A	A	1.8344361004891292e-07	(26, 62)
11	V	83	F	0.033763	A	A	1.8344361004891292e-07	(11, 83)
21	V	104	V	0.033704000000000005	A	A	1.7942207231029813e-07	(21, 104)
29	V	83	F	0.033658999999999994	A	A	1.764074866970184e-07	(29, 83)
19	G	36	D	0.033652999999999995	A	A	1.7600895073175584e-07	(19, 36)
52	S	57	S	0.033613	A	A	1.7337236278939862e-07	(52, 57)
96	C	142	N	0.03352	A	A	1.6737706711236446e-07	(96, 142)
42	L	94	L	0.033510000000000005	A	A	1.6674348030440365e-07	(42, 94)
56	S	148	L	0.033484	A	A	1.6510608803407455e-07	(56, 148)
64	G	120	L	0.03341	A	A	1.6052351846121115e-07	(64, 120)
27	L	48	A	0.033391000000000004	A	A	1.5936525298722914e-07	(27, 48)
124	L	141	I	0.033361	A	A	1.5755148845756365e-07	(124, 141)
119	Y	126	F	0.033342000000000004	A	A	1.5641225572716795e-07	(119, 126)
9	G	103	S	0.033338	A	A	1.5617334969037555e-07	(9, 103)
24	L	93	L	0.033317	A	A	1.5492439111352257e-07	(24, 93)
24	L	35	R	0.033288	A	A	1.5321419464075838e-07	(24, 35)
25	Y	124	L	0.033255	A	A	1.5128848159447323e-07	(25, 124)
90	L	92	L	0.033231000000000004	A	A	1.4990147018129462e-07	(90, 92)
31	A	135	C	0.033185	A	A	1.4727450494328241e-07	(31, 135)
95	G	104	V	0.033151	A	A	1.4535915058967658e-07	(95, 104)
16	C	97	L	0.033104	A	A	1.427478289264611e-07	(16, 97)
106	M	123	I	0.033094	A	A	1.421976259167298e-07	(106, 123)
42	L	135	C	0.033038	A	A	1.3915109774627746e-07	(42, 135)
86	I	99	T	0.032946	A	A	1.3427160738510705e-07	(86, 99)
15	L	147	W	0.032914	A	A	1.3261032383394626e-07	(15, 147)
91	Q	128	L	0.032875	A	A	1.3061030352158176e-07	(91, 128)
34	A	92	L	0.032867	A	A	1.3020336639383773e-07	(34, 92)
48	A	117	S	0.0328	A	A	1.268391804914585e-07	(48, 117)
10	W	40	R	0.032792	A	A	1.2644268652706005e-07	(10, 40)
26	A	80	N	0.032747000000000005	A	A	1.2423282998071694e-07	(26, 80)
104	V	111	L	0.032737	A	A	1.2374643050513382e-07	(104, 111)
129	Y	135	C	0.032728	A	A	1.233101166118475e-07	(129, 135)
97	L	110	S	0.032652	A	A	1.1967978167110118e-07	(97, 110)
64	G	83	F	0.032549	A	A	1.1491120972361901e-07	(64, 83)
49	I	102	A	0.032527	A	A	1.1391481926128616e-07	(49, 102)
36	D	59	W	0.032485	A	A	1.1203389510053401e-07	(36, 59)
87	F	116	G	0.032416	A	A	1.0900361245955674e-07	(87, 116)
58	R	126	F	0.032391	A	A	1.0792378142092092e-07	(58, 126)
37	R	48	A	0.03238	A	A	1.074516727643131e-07	(37, 48)
115	A	145	L	0.032343000000000004	A	A	1.0587710094535536e-07	(115, 145)
33	R	59	W	0.032267000000000004	A	A	1.0270696760464405e-07	(33, 59)
10	W	91	Q	0.032228	A	A	1.0111315661593166e-07	(10, 91)
109	S	133	I	0.032227	A	A	1.01072580196626e-07	(109, 133)
62	G	105	L	0.032224	A	A	1.009509377112715e-07	(62, 105)
114	L	137	T	0.032217	A	A	1.0066761084432572e-07	(114, 137)
106	M	141	I	0.032208999999999995	A	A	1.0034467384229895e-07	(106, 141)
82	I	126	F	0.032206	A	A	1.0022380993577844e-07	(82, 126)
119	Y	120	L	0.032182	A	A	9.926154488723213e-08	(119, 120)
37	R	125	F	0.032162	A	A	9.846593642620033e-08	(37, 125)
138	T	145	L	0.032157	A	A	9.826792171237845e-08	(138, 145)
29	V	53	R	0.032145	A	A	9.779412909862137e-08	(29, 53)
114	L	127	V	0.032144	A	A	9.775473814621973e-08	(114, 127)
62	G	81	S	0.032125	A	A	9.700898354310544e-08	(62, 81)
32	A	82	I	0.032119	A	A	9.677453457416603e-08	(32, 82)
54	V	125	F	0.032111	A	A	9.646271911741696e-08	(54, 125)
59	W	126	F	0.032108	A	A	9.63460186692946e-08	(59, 126)
31	A	64	G	0.032048	A	A	9.403820138416787e-08	(31, 64)
19	G	140	A	0.03203	A	A	9.335550295166619e-08	(19, 140)
18	T	143	V	0.032029	A	A	9.331770473717307e-08	(18, 143)
59	W	103	S	0.032027999999999994	A	A	9.327992012336106e-08	(59, 103)
110	S	115	A	0.031992	A	A	9.192869628466277e-08	(110, 115)
25	Y	148	L	0.031985	A	A	9.166798779123053e-08	(25, 148)
9	G	91	Q	0.031952999999999995	A	A	9.048452643456337e-08	(9, 91)
39	Y	45	V	0.031926	A	A	8.949656453239376e-08	(39, 45)
119	Y	124	L	0.031924	A	A	8.942376505668382e-08	(119, 124)
47	T	101	W	0.031882	A	A	8.790708523928653e-08	(47, 101)
10	W	144	S	0.03184	A	A	8.641331541630134e-08	(10, 144)
34	A	117	S	0.031839	A	A	8.637802621443455e-08	(34, 117)
23	S	61	R	0.031833	A	A	8.61665599225058e-08	(23, 61)
43	C	100	R	0.031787	A	A	8.456054879020793e-08	(43, 100)
98	R	109	S	0.031777	A	A	8.421495836647808e-08	(98, 109)
130	D	137	T	0.03173	A	A	8.260744687614139e-08	(130, 137)
22	L	47	T	0.031721	A	A	8.230275731797974e-08	(22, 47)
119	Y	138	T	0.031721	A	A	8.230275731797974e-08	(119, 138)
86	I	143	V	0.031715	A	A	8.210018653404719e-08	(86, 143)
62	G	94	L	0.031693	A	A	8.136121481849737e-08	(62, 94)
26	A	48	A	0.031667	A	A	8.049551487126389e-08	(26, 48)
95	G	117	S	0.031601	A	A	7.833464698390888e-08	(95, 117)
121	A	140	A	0.031580000000000004	A	A	7.765800234004582e-08	(121, 140)
82	I	97	L	0.031549	A	A	7.666864669572562e-08	(82, 97)
28	H	142	N	0.031543	A	A	7.647845884525093e-08	(28, 142)
33	R	130	D	0.031527	A	A	7.597334140059613e-08	(33, 130)
17	L	23	S	0.031511000000000004	A	A	7.547119391732326e-08	(17, 23)
87	F	145	L	0.03151	A	A	7.543990796408285e-08	(87, 145)
12	R	30	K	0.031503	A	A	7.522122915575769e-08	(12, 30)
53	R	115	A	0.031484	A	A	7.463051229859344e-08	(53, 115)
48	A	120	L	0.031444	A	A	7.340036951677035e-08	(48, 120)
25	Y	130	D	0.031433	A	A	7.306525866691991e-08	(25, 130)
18	T	107	L	0.031417	A	A	7.258025469830299e-08	(18, 107)
49	I	80	N	0.031403	A	A	7.215822833386776e-08	(49, 80)
47	T	128	L	0.031347	A	A	7.049187387407247e-08	(47, 128)
10	W	102	A	0.031339	A	A	7.025664040546112e-08	(10, 102)
96	C	115	A	0.031338	A	A	7.022728539598151e-08	(96, 115)
84	G	103	S	0.031336	A	A	7.0168608120847e-08	(84, 103)
96	C	97	L	0.031331	A	A	7.002210577376478e-08	(96, 97)
23	S	34	A	0.031327	A	A	6.990509995644817e-08	(23, 34)
50	S	88	Y	0.031256	A	A	6.785699803846906e-08	(50, 88)
32	A	90	L	0.03125	A	A	6.768639171810911e-08	(32, 90)
17	L	43	C	0.031249	A	A	6.765799448094402e-08	(17, 43)
116	G	142	N	0.031178	A	A	6.566869214339754e-08	(116, 142)
23	S	136	I	0.031171	A	A	6.547541247395649e-08	(23, 136)
51	C	91	Q	0.031164	A	A	6.528263940145523e-08	(51, 91)
35	R	109	S	0.031107	A	A	6.373162848864237e-08	(35, 109)
96	C	143	V	0.031036	A	A	6.184560428502619e-08	(96, 143)
16	C	144	S	0.031028	A	A	6.163624183596875e-08	(16, 144)
57	S	82	I	0.031016	A	A	6.132338147010816e-08	(57, 82)
36	D	85	C	0.031013	A	A	6.124538768964133e-08	(36, 85)
19	G	100	R	0.030989	A	A	6.062461071455544e-08	(19, 100)
48	A	57	S	0.030958	A	A	5.983107020981633e-08	(48, 57)
88	Y	125	F	0.030938	A	A	5.9324031073023546e-08	(88, 125)
45	V	147	W	0.030930000000000006	A	A	5.912228942959465e-08	(45, 147)
55	F	131	F	0.030891	A	A	5.814752295087068e-08	(55, 131)
59	W	107	L	0.030837	A	A	5.682148341584463e-08	(59, 107)
49	I	150	F	0.030784	A	A	5.5546264460471665e-08	(49, 150)
25	Y	115	A	0.030754000000000007	A	A	5.483580046001801e-08	(25, 115)
18	T	79	S	0.030725	A	A	5.415672666643822e-08	(18, 79)
117	S	119	Y	0.030719	A	A	5.401716786901741e-08	(117, 119)
56	S	103	S	0.030701	A	A	5.360041222611863e-08	(56, 103)
21	V	143	V	0.030660000000000007	A	A	5.26618131677671e-08	(21, 143)
94	L	95	G	0.03064	A	A	5.220929786286652e-08	(94, 95)
35	R	107	L	0.030619	A	A	5.173788954472759e-08	(35, 107)
21	V	46	G	0.03061	A	A	5.1537021422170284e-08	(21, 46)
21	V	85	C	0.030597000000000006	A	A	5.124810564372459e-08	(21, 85)
11	V	125	F	0.030582	A	A	5.091653580907002e-08	(11, 125)
124	L	133	I	0.030575	A	A	5.0762458633104204e-08	(124, 133)
16	C	42	L	0.030572	A	A	5.0696552877763465e-08	(16, 42)
26	A	116	G	0.030542000000000007	A	A	5.0041678064068846e-08	(26, 116)
57	S	121	A	0.030536	A	A	4.991161170808168e-08	(57, 121)
38	D	58	R	0.03051	A	A	4.9351466324972574e-08	(38, 58)
127	V	140	A	0.030435000000000007	A	A	4.7766926687272544e-08	(127, 140)
14	A	146	M	0.030417000000000007	A	A	4.7393454087169225e-08	(14, 146)
65	L	79	S	0.030404	A	A	4.712534539957037e-08	(65, 79)
49	I	54	V	0.030369	A	A	4.641022369576083e-08	(49, 54)
109	S	149	S	0.030319	A	A	4.5405406931469955e-08	(109, 149)
115	A	141	I	0.030288	A	A	4.479220802038883e-08	(115, 141)
104	V	109	S	0.030251	A	A	4.4070001487374864e-08	(104, 109)
115	A	138	T	0.030217	A	A	4.3415528603833534e-08	(115, 138)
96	C	118	V	0.030121	A	A	4.16141493702493e-08	(96, 118)
48	A	84	G	0.030118	A	A	4.1558947155780603e-08	(48, 84)
37	R	43	C	0.030113	A	A	4.146708863671695e-08	(37, 43)
18	T	29	V	0.030097	A	A	4.117435745732647e-08	(18, 29)
117	S	130	D	0.030094	A	A	4.1119676091736285e-08	(117, 130)
17	L	56	S	0.030077	A	A	4.081103710878747e-08	(17, 56)
15	L	21	V	0.03003	A	A	3.9968469916900154e-08	(15, 21)
27	L	141	I	0.030024	A	A	3.9862033251611154e-08	(27, 141)
44	D	111	L	0.029962	A	A	3.8776907317485866e-08	(44, 111)
83	F	117	S	0.029918	A	A	3.8022892047837993e-08	(83, 117)
58	R	116	G	0.029886000000000006	A	A	3.748276573167249e-08	(58, 116)
28	H	130	D	0.029797000000000008	A	A	3.601636995449586e-08	(28, 130)
39	Y	120	L	0.029777	A	A	3.5693977702583824e-08	(39, 120)
53	R	136	I	0.029742	A	A	3.5135986185894575e-08	(53, 136)
9	G	136	I	0.02969	A	A	3.432134774294141e-08	(9, 136)
35	R	98	R	0.029646	A	A	3.3645257418048565e-08	(35, 98)
13	L	50	S	0.029632	A	A	3.3432646215694967e-08	(13, 50)
83	F	139	Y	0.029629000000000006	A	A	3.3387243092181703e-08	(83, 139)
32	A	91	Q	0.029612	A	A	3.313099734889226e-08	(32, 91)
82	I	102	A	0.029608	A	A	3.3070960107729435e-08	(82, 102)
25	Y	62	G	0.029560000000000006	A	A	3.235805465541515e-08	(25, 62)
44	D	59	W	0.029559	A	A	3.2343349582155735e-08	(44, 59)
35	R	45	V	0.029524	A	A	3.1832417730059835e-08	(35, 45)
30	K	32	A	0.029514	A	A	3.1687767679095286e-08	(30, 32)
15	L	83	F	0.029508	A	A	3.160125976966844e-08	(15, 83)
38	D	118	V	0.029502	A	A	3.1514962898898564e-08	(38, 118)
15	L	17	L	0.029432	A	A	3.052360845973518e-08	(15, 17)
43	C	65	L	0.029382	A	A	2.983265524964493e-08	(43, 65)
83	F	133	I	0.029381	A	A	2.9818979926007474e-08	(83, 133)
120	L	132	C	0.029376	A	A	2.9750687296250838e-08	(120, 132)
9	G	118	V	0.029363	A	A	2.95737800816685e-08	(9, 118)
15	L	150	F	0.029353	A	A	2.9438337909551632e-08	(15, 150)
25	Y	40	R	0.029308	A	A	2.8835682474818462e-08	(25, 40)
24	L	25	Y	0.029297000000000007	A	A	2.8690054282264142e-08	(24, 25)
97	L	125	F	0.029269	A	A	2.8322325916633285e-08	(97, 125)
24	L	62	G	0.029266000000000007	A	A	2.8283177400577904e-08	(24, 62)
112	V	126	F	0.029184	A	A	2.7231672044854206e-08	(112, 126)
102	A	109	S	0.029176	A	A	2.713098141300683e-08	(102, 109)
105	L	145	L	0.029142	A	A	2.6706749171385012e-08	(105, 145)
15	L	116	G	0.029136	A	A	2.6632503395967063e-08	(15, 116)
106	M	148	L	0.029110000000000007	A	A	2.631289957117292e-08	(106, 148)
35	R	126	F	0.029110000000000007	A	A	2.631289957117292e-08	(35, 126)
44	D	121	A	0.029084	A	A	2.5996729302403452e-08	(44, 121)
57	S	132	C	0.029051	A	A	2.5600330115452596e-08	(57, 132)
65	L	112	V	0.029047000000000007	A	A	2.5552650890670988e-08	(65, 112)
94	L	106	M	0.029035	A	A	2.5410089278429916e-08	(94, 106)
100	R	105	L	0.029034	A	A	2.539824131075652e-08	(100, 105)
31	A	39	Y	0.029027	A	A	2.5315443763848446e-08	(31, 39)
24	L	31	A	0.029025	A	A	2.5291831697794644e-08	(24, 31)
130	D	136	I	0.029022000000000006	A	A	2.5256450524577304e-08	(130, 136)
18	T	151	R	0.029004	A	A	2.5045091411528866e-08	(18, 151)
9	G	89	T	0.028978	A	A	2.47425871896748e-08	(9, 89)
36	D	137	T	0.028914	A	A	2.4011836297126036e-08	(36, 137)
22	L	80	N	0.028873000000000006	A	A	2.3553904050431067e-08	(22, 80)
47	T	57	S	0.02887	A	A	2.352070559305653e-08	(47, 57)
95	G	116	G	0.02884	A	A	2.3191015890738372e-08	(95, 116)
20	L	112	V	0.028836	A	A	2.314737108658957e-08	(20, 112)
82	I	108	L	0.028827	A	A	2.3049438830405708e-08	(82, 108)
14	A	35	R	0.028825	A	A	2.3027726510726934e-08	(14, 35)
38	D	104	V	0.02882	A	A	2.2973525741576272e-08	(38, 104)
99	T	133	I	0.028814	A	A	2.290863549073236e-08	(99, 133)
45	V	127	V	0.028807	A	A	2.283313748236286e-08	(45, 127)
107	L	120	L	0.028751	A	A	2.223712160809564e-08	(107, 120)
17	L	106	M	0.02875	A	A	2.222660619099108e-08	(17, 106)
16	C	57	S	0.028722	A	A	2.1933974960374732e-08	(16, 57)
34	A	130	D	0.028675	A	A	2.145051534388422e-08	(34, 130)
[truncated: 6,386 more rows]
