# Supplementary material for: Multiplexed measurement of variant abundance and activity reveals VKOR topology, active site and human variant impact
Source: eLife. 2020 Sep 1;9:e58026. doi: 10.7554/eLife.58026 (PMC7462613; doi:10.7554/eLife.58026)
Supplement: Supplementary file 1. [file elife-58026-supp1.csv]

Replicate	Cells recombined	Cells sorted in four-way sort
1	256,324	200,000
2	256,324	200,000
3	111,570	183,000
4	155,169	100,000
5	105,000	103,000
6	54,045	120,000
7	54,045	125,000
