# Supplementary material for: Multiplexed measurement of variant abundance and activity reveals VKOR topology, active site and human variant impact
Source: eLife. 2020 Sep 1;9:e58026. doi: 10.7554/eLife.58026 (PMC7462613; doi:10.7554/eLife.58026)
Supplement: Supplementary file 2. [file elife-58026-supp2.csv]

Replicate	Cells recombined	Cells sorted in four-way sort
1	85,492	200,000
2	85,492	150,000
3	85,492	100,000
4	165,000	90,000
5	165,000	90,000
6	165,000	100,000
