# Supplementary material for: Multiplexed measurement of variant abundance and activity reveals VKOR topology, active site and human variant impact
Source: eLife. 2020 Sep 1;9:e58026. doi: 10.7554/eLife.58026 (PMC7462613; doi:10.7554/eLife.58026)
Supplement: Supplementary file 7. [file elife-58026-supp7.csv]

Oligo name	Sequence
VKORC1_gRNA_1_F	CACCGGCGAGAGCACTAAGCCCGTC
VKORC1_gRNA_1_R	AAACGACGGGCTTAGTGCTCTCGCC
VKORC1L1_gRNA1_F	CACCGGCGGCACCGACACTCTTAGC
VKORC1L1_gRNA1_R	AAACGCTAAGAGTGTCGGTGCCGCC
VKORC1_gRNA_2_F (MAC242)	CACCgGACGCGCGAACAGCTGATGG
VKORC1_gRNA_2_R (MAC243)	AAACCCATCAGCTGTTCGCGCGTCC
VKORC1L1_gRNA_2_F (MAC231)	CACCGTTGCCTCCAGGTAGCCGGCT
VKORC1L1_gRNA_2_R (MAC232)	AAACAGCCGGCTACCTGGAGGCAAc
VKOR_bc_oligo	gtctgacctcccttaagaattcaccggtttctccctcaggtctgcaATTGCGTGAGTAGGGTCGACCAAGAACCGCTAGAAGCGTCGCTGTACAAATAGTTNNNNNNNNNNNNNNNNNNTGCGAGTAGTCGTTTGCTTTCTCGAACCgtcatatgacggtaccgcgggcccgggatccaccggatctagataactgatc
VKOR_indexF_1.1	AATGATACGGCGACCACCGAGATCTACACtagggtcgaccaagaaccg
PTEN_seq_R_generic_a	CAAGCAGAAGACGGCATACGAGATNNNNNNNNGGGTTAGCAAGTGGCAGCCT
KAM_499(amp1F)	gagaacgtatgtcgaggtaggc
VKORampR 1.1	GGGTTAGCAAGTGGCAGCCTgggcagtctctctgattcca
VKOR_Seq_read1	GGGTCGACCAAGAACCGCTAGAAGCGTCGCTGTACAAATAGTT
VKOR_Seq_index1	tcagagagactgcccAGGCTGCCACTTGCTAACCC
VKOR_for_amp_index2	tgcagacctgaaCATAtgacGGTTCGAGAAAGCAAACGACTACTCGCA
VKOR_false_index2	aactatttgtacagcgacgcttctagcggttcttggt
VKOR_f_2	NNKAGCACCTGGGGGAGCCCTGGCTGGGTGCGG
VKOR_f_3	NNKACCTGGGGGAGCCCTGGCTGGGTGCGGCTC
VKOR_f_4	NNKTGGGGGAGCCCTGGCTGGGTGCGGCTCGCT
VKOR_f_5	NNKGGGAGCCCTGGCTGGGTGCGGCTCGCTCTT
VKOR_f_6	NNKAGCCCTGGCTGGGTGCGGCTCGCTCTTTGC
VKOR_f_7	NNKCCTGGCTGGGTGCGGCTCGCTCTTTGCCTG
VKOR_f_8	NNKGGCTGGGTGCGGCTCGCTCTTTGCCTGACG
VKOR_f_9	NNKTGGGTGCGGCTCGCTCTTTGCCTGACGGGC
VKOR_f_10	NNKGTGCGGCTCGCTCTTTGCCTGACGGGCTTA
VKOR_f_11	NNKCGGCTCGCTCTTTGCCTGACGGGCTTAGTG
VKOR_f_12	NNKCTCGCTCTTTGCCTGACGGGCTTAGTGCTC
VKOR_f_13	NNKGCTCTTTGCCTGACGGGCTTAGTGCTCTCG
VKOR_f_14	NNKCTTTGCCTGACGGGCTTAGTGCTCTCGCTC
VKOR_f_15	NNKTGCCTGACGGGCTTAGTGCTCTCGCTCTAC
VKOR_f_16	NNKCTGACGGGCTTAGTGCTCTCGCTCTACGCG
VKOR_f_17	NNKACGGGCTTAGTGCTCTCGCTCTACGCGCTG
VKOR_f_18	NNKGGCTTAGTGCTCTCGCTCTACGCGCTGCAC
VKOR_f_19	NNKTTAGTGCTCTCGCTCTACGCGCTGCACGTG
VKOR_f_20	NNKGTGCTCTCGCTCTACGCGCTGCACGTGAAG
VKOR_f_21	NNKCTCTCGCTCTACGCGCTGCACGTGAAGGCG
VKOR_f_22	NNKTCGCTCTACGCGCTGCACGTGAAGGCGGCG
VKOR_f_23	NNKCTCTACGCGCTGCACGTGAAGGCGGCGCGC
VKOR_f_24	NNKTACGCGCTGCACGTGAAGGCGGCGCGCGCC
VKOR_f_25	NNKGCGCTGCACGTGAAGGCGGCGCGCGCCCGG
VKOR_f_26	NNKCTGCACGTGAAGGCGGCGCGCGCCCGGGAC
VKOR_f_27	NNKCACGTGAAGGCGGCGCGCGCCCGGGACCGG
VKOR_f_28	NNKGTGAAGGCGGCGCGCGCCCGGGACCGGGAT
VKOR_f_29	NNKAAGGCGGCGCGCGCCCGGGACCGGGATTAC
VKOR_f_30	NNKGCGGCGCGCGCCCGGGACCGGGATTACCGC
VKOR_f_31	NNKGCGCGCGCCCGGGACCGGGATTACCGCGCG
VKOR_f_32	NNKCGCGCCCGGGACCGGGATTACCGCGCGCTC
VKOR_f_33	NNKGCCCGGGACCGGGATTACCGCGCGCTCTGC
VKOR_f_34	NNKCGGGACCGGGATTACCGCGCGCTCTGCGAC
VKOR_f_35	NNKGACCGGGATTACCGCGCGCTCTGCGACGTG
VKOR_f_36	NNKCGGGATTACCGCGCGCTCTGCGACGTGGGC
VKOR_f_37	NNKGATTACCGCGCGCTCTGCGACGTGGGCACC
VKOR_f_38	NNKTACCGCGCGCTCTGCGACGTGGGCACCGCC
VKOR_f_39	NNKCGCGCGCTCTGCGACGTGGGCACCGCCATC
VKOR_f_40	NNKGCGCTCTGCGACGTGGGCACCGCCATCAGC
VKOR_f_41	NNKCTCTGCGACGTGGGCACCGCCATCAGCTGT
VKOR_f_42	NNKTGCGACGTGGGCACCGCCATCAGCTGTTCG
VKOR_f_43	NNKGACGTGGGCACCGCCATCAGCTGTTCGCGC
VKOR_f_44	NNKGTGGGCACCGCCATCAGCTGTTCGCGCGTC
VKOR_f_45	NNKGGCACCGCCATCAGCTGTTCGCGCGTCTTC
VKOR_f_46	NNKACCGCCATCAGCTGTTCGCGCGTCTTCTCC
VKOR_f_47	NNKGCCATCAGCTGTTCGCGCGTCTTCTCCTCC
VKOR_f_48	NNKATCAGCTGTTCGCGCGTCTTCTCCTCCAGG
VKOR_f_49	NNKAGCTGTTCGCGCGTCTTCTCCTCCAGGTGG
VKOR_f_50	NNKTGTTCGCGCGTCTTCTCCTCCAGGTGGGGC
VKOR_f_51	NNKTCGCGCGTCTTCTCCTCCAGGTGGGGCAGG
VKOR_f_52	NNKCGCGTCTTCTCCTCCAGGTGGGGCAGGGGT
VKOR_f_53	NNKGTCTTCTCCTCCAGGTGGGGCAGGGGTTTC
VKOR_f_54	NNKTTCTCCTCCAGGTGGGGCAGGGGTTTCGGG
VKOR_f_55	NNKTCCTCCAGGTGGGGCAGGGGTTTCGGGCTG
VKOR_f_56	NNKTCCAGGTGGGGCAGGGGTTTCGGGCTGGTG
VKOR_f_57	NNKAGGTGGGGCAGGGGTTTCGGGCTGGTGGAG
VKOR_f_58	NNKTGGGGCAGGGGTTTCGGGCTGGTGGAGCAT
VKOR_f_59	NNKGGCAGGGGTTTCGGGCTGGTGGAGCATGTG
VKOR_f_60	NNKAGGGGTTTCGGGCTGGTGGAGCATGTGCTG
VKOR_f_61	NNKGGTTTCGGGCTGGTGGAGCATGTGCTGGGA
VKOR_f_62	NNKTTCGGGCTGGTGGAGCATGTGCTGGGACAG
VKOR_f_63	NNKGGGCTGGTGGAGCATGTGCTGGGACAGGAC
VKOR_f_64	NNKCTGGTGGAGCATGTGCTGGGACAGGACAGC
VKOR_f_65	NNKGTGGAGCATGTGCTGGGACAGGACAGCATC
VKOR_f_66	NNKGAGCATGTGCTGGGACAGGACAGCATCCTC
VKOR_f_67	NNKCATGTGCTGGGACAGGACAGCATCCTCAAT
VKOR_f_68	NNKGTGCTGGGACAGGACAGCATCCTCAATCAA
VKOR_f_69	NNKCTGGGACAGGACAGCATCCTCAATCAATCC
VKOR_f_70	NNKGGACAGGACAGCATCCTCAATCAATCCAAC
VKOR_f_71	NNKCAGGACAGCATCCTCAATCAATCCAACAGC
VKOR_f_72	NNKGACAGCATCCTCAATCAATCCAACAGCATA
VKOR_f_73	NNKAGCATCCTCAATCAATCCAACAGCATATTC
VKOR_f_74	NNKATCCTCAATCAATCCAACAGCATATTCGGT
VKOR_f_75	NNKCTCAATCAATCCAACAGCATATTCGGTTGC
VKOR_f_76	NNKAATCAATCCAACAGCATATTCGGTTGCATC
VKOR_f_77	NNKCAATCCAACAGCATATTCGGTTGCATCTTC
VKOR_f_78	NNKTCCAACAGCATATTCGGTTGCATCTTCTAC
VKOR_f_79	NNKAACAGCATATTCGGTTGCATCTTCTACACA
VKOR_f_80	NNKAGCATATTCGGTTGCATCTTCTACACACTA
VKOR_f_81	NNKATATTCGGTTGCATCTTCTACACACTACAG
VKOR_f_82	NNKTTCGGTTGCATCTTCTACACACTACAGCTA
VKOR_f_83	NNKGGTTGCATCTTCTACACACTACAGCTATTG
VKOR_f_84	NNKTGCATCTTCTACACACTACAGCTATTGTTA
VKOR_f_85	NNKATCTTCTACACACTACAGCTATTGTTAGGT
VKOR_f_86	NNKTTCTACACACTACAGCTATTGTTAGGTTGC
VKOR_f_87	NNKTACACACTACAGCTATTGTTAGGTTGCCTG
VKOR_f_88	NNKACACTACAGCTATTGTTAGGTTGCCTGCGG
VKOR_f_89	NNKCTACAGCTATTGTTAGGTTGCCTGCGGACA
VKOR_f_90	NNKCAGCTATTGTTAGGTTGCCTGCGGACACGC
VKOR_f_91	NNKCTATTGTTAGGTTGCCTGCGGACACGCTGG
VKOR_f_92	NNKTTGTTAGGTTGCCTGCGGACACGCTGGGCC
VKOR_f_93	NNKTTAGGTTGCCTGCGGACACGCTGGGCCTCT
VKOR_f_94	NNKGGTTGCCTGCGGACACGCTGGGCCTCTGTC
VKOR_f_95	NNKTGCCTGCGGACACGCTGGGCCTCTGTCCTG
VKOR_f_96	NNKCTGCGGACACGCTGGGCCTCTGTCCTGATG
VKOR_f_97	NNKCGGACACGCTGGGCCTCTGTCCTGATGCTG
VKOR_f_98	NNKACACGCTGGGCCTCTGTCCTGATGCTGCTG
VKOR_f_99	NNKCGCTGGGCCTCTGTCCTGATGCTGCTGAGC
VKOR_f_100	NNKTGGGCCTCTGTCCTGATGCTGCTGAGCTCC
VKOR_f_101	NNKGCCTCTGTCCTGATGCTGCTGAGCTCCCTG
VKOR_f_102	NNKTCTGTCCTGATGCTGCTGAGCTCCCTGGTG
VKOR_f_103	NNKGTCCTGATGCTGCTGAGCTCCCTGGTGTCT
VKOR_f_104	NNKCTGATGCTGCTGAGCTCCCTGGTGTCTCTC
VKOR_f_105	NNKATGCTGCTGAGCTCCCTGGTGTCTCTCGCT
VKOR_f_106	NNKCTGCTGAGCTCCCTGGTGTCTCTCGCTGGT
VKOR_f_107	NNKCTGAGCTCCCTGGTGTCTCTCGCTGGTTCT
VKOR_f_108	NNKAGCTCCCTGGTGTCTCTCGCTGGTTCTGTC
VKOR_f_109	NNKTCCCTGGTGTCTCTCGCTGGTTCTGTCTAC
VKOR_f_110	NNKCTGGTGTCTCTCGCTGGTTCTGTCTACCTG
VKOR_f_111	NNKGTGTCTCTCGCTGGTTCTGTCTACCTGGCC
VKOR_f_112	NNKTCTCTCGCTGGTTCTGTCTACCTGGCCTGG
VKOR_f_113	NNKCTCGCTGGTTCTGTCTACCTGGCCTGGATC
VKOR_f_114	NNKGCTGGTTCTGTCTACCTGGCCTGGATCCTG
VKOR_f_115	NNKGGTTCTGTCTACCTGGCCTGGATCCTGTTC
VKOR_f_116	NNKTCTGTCTACCTGGCCTGGATCCTGTTCTTC
VKOR_f_117	NNKGTCTACCTGGCCTGGATCCTGTTCTTCGTG
VKOR_f_118	NNKTACCTGGCCTGGATCCTGTTCTTCGTGCTC
VKOR_f_119	NNKCTGGCCTGGATCCTGTTCTTCGTGCTCTAT
VKOR_f_120	NNKGCCTGGATCCTGTTCTTCGTGCTCTATGAT
VKOR_f_121	NNKTGGATCCTGTTCTTCGTGCTCTATGATTTC
VKOR_f_122	NNKATCCTGTTCTTCGTGCTCTATGATTTCTGC
VKOR_f_123	NNKCTGTTCTTCGTGCTCTATGATTTCTGCATT
VKOR_f_124	NNKTTCTTCGTGCTCTATGATTTCTGCATTGTT
VKOR_f_125	NNKTTCGTGCTCTATGATTTCTGCATTGTTTGT
VKOR_f_126	NNKGTGCTCTATGATTTCTGCATTGTTTGTATC
VKOR_f_127	NNKCTCTATGATTTCTGCATTGTTTGTATCACC
VKOR_f_128	NNKTATGATTTCTGCATTGTTTGTATCACCACC
VKOR_f_129	NNKGATTTCTGCATTGTTTGTATCACCACCTAT
VKOR_f_130	NNKTTCTGCATTGTTTGTATCACCACCTATGCT
VKOR_f_131	NNKTGCATTGTTTGTATCACCACCTATGCTATC
VKOR_f_132	NNKATTGTTTGTATCACCACCTATGCTATCAAC
VKOR_f_133	NNKGTTTGTATCACCACCTATGCTATCAACGTG
VKOR_f_134	NNKTGTATCACCACCTATGCTATCAACGTGAGC
VKOR_f_135	NNKATCACCACCTATGCTATCAACGTGAGCCTG
VKOR_f_136	NNKACCACCTATGCTATCAACGTGAGCCTGATG
VKOR_f_137	NNKACCTATGCTATCAACGTGAGCCTGATGTGG
VKOR_f_138	NNKTATGCTATCAACGTGAGCCTGATGTGGCTC
VKOR_f_139	NNKGCTATCAACGTGAGCCTGATGTGGCTCAGT
VKOR_f_140	NNKATCAACGTGAGCCTGATGTGGCTCAGTTTC
VKOR_f_141	NNKAACGTGAGCCTGATGTGGCTCAGTTTCCGG
VKOR_f_142	NNKGTGAGCCTGATGTGGCTCAGTTTCCGGAAG
VKOR_f_143	NNKAGCCTGATGTGGCTCAGTTTCCGGAAGGTC
VKOR_f_144	NNKCTGATGTGGCTCAGTTTCCGGAAGGTCCAA
VKOR_f_145	NNKATGTGGCTCAGTTTCCGGAAGGTCCAAGAA
VKOR_f_146	NNKTGGCTCAGTTTCCGGAAGGTCCAAGAACCC
VKOR_f_147	NNKCTCAGTTTCCGGAAGGTCCAAGAACCCCAG
VKOR_f_148	NNKAGTTTCCGGAAGGTCCAAGAACCCCAGGGC
VKOR_f_149	NNKTTCCGGAAGGTCCAAGAACCCCAGGGCAAG
VKOR_f_150	NNKCGGAAGGTCCAAGAACCCCAGGGCAAGGCT
VKOR_f_151	NNKAAGGTCCAAGAACCCCAGGGCAAGGCTAAG
VKOR_f_152	NNKGTCCAAGAACCCCAGGGCAAGGCTAAGAGG
VKOR_f_153	NNKCAAGAACCCCAGGGCAAGGCTAAGAGGCAC
VKOR_f_154	NNKGAACCCCAGGGCAAGGCTAAGAGGCACTAG
VKOR_f_155	NNKCCCCAGGGCAAGGCTAAGAGGCACTAGTAA
VKOR_f_156	NNKCAGGGCAAGGCTAAGAGGCACTAGTAActt
VKOR_f_157	NNKGGCAAGGCTAAGAGGCACTAGTAActtaag
VKOR_f_158	NNKAAGGCTAAGAGGCACTAGTAActtaagaat
VKOR_f_159	NNKGCTAAGAGGCACTAGTAActtaagaattca
VKOR_f_160	NNKAAGAGGCACTAGTAActtaagaattcaccg
VKOR_f_161	NNKAGGCACTAGTAActtaagaattcaccggtc
VKOR_f_162	NNKCACTAGTAActtaagaattcaccggtctga
VKOR_f_163	NNKTAGTAActtaagaattcaccggtctgacct
VKOR_r_2	CATGGTGGCTCCGCTGCCTCTAGAACGCGT
VKOR_r_3	GCCCATGGTGGCTCCGCTGCCTCTAGAACG
VKOR_r_4	GCTGCCCATGGTGGCTCCGCTGCCTCTAGA
VKOR_r_5	GGTGCTGCCCATGGTGGCTCCGCTGCCTCT
VKOR_r_6	CCAGGTGCTGCCCATGGTGGCTCCGCTGCC
VKOR_r_7	CCCCCAGGTGCTGCCCATGGTGGCTCCGCT
VKOR_r_8	GCTCCCCCAGGTGCTGCCCATGGTGGCTCC
VKOR_r_9	AGGGCTCCCCCAGGTGCTGCCCATGGTGGC
VKOR_r_10	GCCAGGGCTCCCCCAGGTGCTGCCCATGGT
VKOR_r_11	CCAGCCAGGGCTCCCCCAGGTGCTGCCCAT
VKOR_r_12	CACCCAGCCAGGGCTCCCCCAGGTGCTGCC
VKOR_r_13	CCGCACCCAGCCAGGGCTCCCCCAGGTGCT
VKOR_r_14	GAGCCGCACCCAGCCAGGGCTCCCCCAGGT
VKOR_r_15	AGCGAGCCGCACCCAGCCAGGGCTCCCCCA
VKOR_r_16	AAGAGCGAGCCGCACCCAGCCAGGGCTCCC
VKOR_r_17	GCAAAGAGCGAGCCGCACCCAGCCAGGGCT
VKOR_r_18	CAGGCAAAGAGCGAGCCGCACCCAGCCAGG
VKOR_r_19	CGTCAGGCAAAGAGCGAGCCGCACCCAGCC
VKOR_r_20	GCCCGTCAGGCAAAGAGCGAGCCGCACCCA
VKOR_r_21	TAAGCCCGTCAGGCAAAGAGCGAGCCGCAC
VKOR_r_22	CACTAAGCCCGTCAGGCAAAGAGCGAGCCG
VKOR_r_23	GAGCACTAAGCCCGTCAGGCAAAGAGCGAG
VKOR_r_24	CGAGAGCACTAAGCCCGTCAGGCAAAGAGC
VKOR_r_25	GAGCGAGAGCACTAAGCCCGTCAGGCAAAG
VKOR_r_26	GTAGAGCGAGAGCACTAAGCCCGTCAGGCA
VKOR_r_27	CGCGTAGAGCGAGAGCACTAAGCCCGTCAG
VKOR_r_28	CAGCGCGTAGAGCGAGAGCACTAAGCCCGT
VKOR_r_29	GTGCAGCGCGTAGAGCGAGAGCACTAAGCC
VKOR_r_30	CACGTGCAGCGCGTAGAGCGAGAGCACTAA
VKOR_r_31	CTTCACGTGCAGCGCGTAGAGCGAGAGCAC
VKOR_r_32	CGCCTTCACGTGCAGCGCGTAGAGCGAGAG
VKOR_r_33	CGCCGCCTTCACGTGCAGCGCGTAGAGCGA
VKOR_r_34	GCGCGCCGCCTTCACGTGCAGCGCGTAGAG
VKOR_r_35	GGCGCGCGCCGCCTTCACGTGCAGCGCGTA
VKOR_r_36	CCGGGCGCGCGCCGCCTTCACGTGCAGCGC
VKOR_r_37	GTCCCGGGCGCGCGCCGCCTTCACGTGCAG
VKOR_r_38	CCGGTCCCGGGCGCGCGCCGCCTTCACGTG
VKOR_r_39	ATCCCGGTCCCGGGCGCGCGCCGCCTTCAC
VKOR_r_40	GTAATCCCGGTCCCGGGCGCGCGCCGCCTT
VKOR_r_41	GCGGTAATCCCGGTCCCGGGCGCGCGCCGC
VKOR_r_42	CGCGCGGTAATCCCGGTCCCGGGCGCGCGC
VKOR_r_43	GAGCGCGCGGTAATCCCGGTCCCGGGCGCG
VKOR_r_44	GCAGAGCGCGCGGTAATCCCGGTCCCGGGC
VKOR_r_45	GTCGCAGAGCGCGCGGTAATCCCGGTCCCG
VKOR_r_46	CACGTCGCAGAGCGCGCGGTAATCCCGGTC
VKOR_r_47	GCCCACGTCGCAGAGCGCGCGGTAATCCCG
VKOR_r_48	GGTGCCCACGTCGCAGAGCGCGCGGTAATC
VKOR_r_49	GGCGGTGCCCACGTCGCAGAGCGCGCGGTA
VKOR_r_50	GATGGCGGTGCCCACGTCGCAGAGCGCGCG
VKOR_r_51	GCTGATGGCGGTGCCCACGTCGCAGAGCGC
VKOR_r_52	ACAGCTGATGGCGGTGCCCACGTCGCAGAG
VKOR_r_53	CGAACAGCTGATGGCGGTGCCCACGTCGCA
VKOR_r_54	GCGCGAACAGCTGATGGCGGTGCCCACGTC
VKOR_r_55	GACGCGCGAACAGCTGATGGCGGTGCCCAC
VKOR_r_56	GAAGACGCGCGAACAGCTGATGGCGGTGCC
VKOR_r_57	GGAGAAGACGCGCGAACAGCTGATGGCGGT
VKOR_r_58	GGAGGAGAAGACGCGCGAACAGCTGATGGC
VKOR_r_59	CCTGGAGGAGAAGACGCGCGAACAGCTGAT
VKOR_r_60	CCACCTGGAGGAGAAGACGCGCGAACAGCT
VKOR_r_61	GCCCCACCTGGAGGAGAAGACGCGCGAACA
VKOR_r_62	CCTGCCCCACCTGGAGGAGAAGACGCGCGA
VKOR_r_63	ACCCCTGCCCCACCTGGAGGAGAAGACGCG
VKOR_r_64	GAAACCCCTGCCCCACCTGGAGGAGAAGAC
VKOR_r_65	CCCGAAACCCCTGCCCCACCTGGAGGAGAA
VKOR_r_66	CAGCCCGAAACCCCTGCCCCACCTGGAGGA
VKOR_r_67	CACCAGCCCGAAACCCCTGCCCCACCTGGA
VKOR_r_68	CTCCACCAGCCCGAAACCCCTGCCCCACCT
VKOR_r_69	ATGCTCCACCAGCCCGAAACCCCTGCCCCA
VKOR_r_70	CACATGCTCCACCAGCCCGAAACCCCTGCC
VKOR_r_71	CAGCACATGCTCCACCAGCCCGAAACCCCT
VKOR_r_72	TCCCAGCACATGCTCCACCAGCCCGAAACC
VKOR_r_73	CTGTCCCAGCACATGCTCCACCAGCCCGAA
VKOR_r_74	GTCCTGTCCCAGCACATGCTCCACCAGCCC
VKOR_r_75	GCTGTCCTGTCCCAGCACATGCTCCACCAG
VKOR_r_76	GATGCTGTCCTGTCCCAGCACATGCTCCAC
VKOR_r_77	GAGGATGCTGTCCTGTCCCAGCACATGCTC
VKOR_r_78	ATTGAGGATGCTGTCCTGTCCCAGCACATG
VKOR_r_79	TTGATTGAGGATGCTGTCCTGTCCCAGCAC
VKOR_r_80	GGATTGATTGAGGATGCTGTCCTGTCCCAG
VKOR_r_81	GTTGGATTGATTGAGGATGCTGTCCTGTCC
VKOR_r_82	GCTGTTGGATTGATTGAGGATGCTGTCCTG
VKOR_r_83	TATGCTGTTGGATTGATTGAGGATGCTGTC
VKOR_r_84	GAATATGCTGTTGGATTGATTGAGGATGCT
VKOR_r_85	ACCGAATATGCTGTTGGATTGATTGAGGAT
VKOR_r_86	GCAACCGAATATGCTGTTGGATTGATTGAG
VKOR_r_87	GATGCAACCGAATATGCTGTTGGATTGATT
VKOR_r_88	GAAGATGCAACCGAATATGCTGTTGGATTG
VKOR_r_89	GTAGAAGATGCAACCGAATATGCTGTTGGA
VKOR_r_90	TGTGTAGAAGATGCAACCGAATATGCTGTT
VKOR_r_91	TAGTGTGTAGAAGATGCAACCGAATATGCT
VKOR_r_92	CTGTAGTGTGTAGAAGATGCAACCGAATAT
VKOR_r_93	TAGCTGTAGTGTGTAGAAGATGCAACCGAA
VKOR_r_94	CAATAGCTGTAGTGTGTAGAAGATGCAACC
VKOR_r_95	TAACAATAGCTGTAGTGTGTAGAAGATGCA
VKOR_r_96	ACCTAACAATAGCTGTAGTGTGTAGAAGAT
VKOR_r_97	GCAACCTAACAATAGCTGTAGTGTGTAGAA
VKOR_r_98	CAGGCAACCTAACAATAGCTGTAGTGTGTA
VKOR_r_99	CCGCAGGCAACCTAACAATAGCTGTAGTGT
VKOR_r_100	TGTCCGCAGGCAACCTAACAATAGCTGTAG
VKOR_r_101	GCGTGTCCGCAGGCAACCTAACAATAGCTG
VKOR_r_102	CCAGCGTGTCCGCAGGCAACCTAACAATAG
VKOR_r_103	GGCCCAGCGTGTCCGCAGGCAACCTAACAA
VKOR_r_104	AGAGGCCCAGCGTGTCCGCAGGCAACCTAA
VKOR_r_105	GACAGAGGCCCAGCGTGTCCGCAGGCAACC
VKOR_r_106	CAGGACAGAGGCCCAGCGTGTCCGCAGGCA
VKOR_r_107	CATCAGGACAGAGGCCCAGCGTGTCCGCAG
VKOR_r_108	CAGCATCAGGACAGAGGCCCAGCGTGTCCG
VKOR_r_109	CAGCAGCATCAGGACAGAGGCCCAGCGTGT
VKOR_r_110	GCTCAGCAGCATCAGGACAGAGGCCCAGCG
VKOR_r_111	GGAGCTCAGCAGCATCAGGACAGAGGCCCA
VKOR_r_112	CAGGGAGCTCAGCAGCATCAGGACAGAGGC
VKOR_r_113	CACCAGGGAGCTCAGCAGCATCAGGACAGA
VKOR_r_114	AGACACCAGGGAGCTCAGCAGCATCAGGAC
VKOR_r_115	GAGAGACACCAGGGAGCTCAGCAGCATCAG
VKOR_r_116	AGCGAGAGACACCAGGGAGCTCAGCAGCAT
VKOR_r_117	ACCAGCGAGAGACACCAGGGAGCTCAGCAG
VKOR_r_118	AGAACCAGCGAGAGACACCAGGGAGCTCAG
VKOR_r_119	GACAGAACCAGCGAGAGACACCAGGGAGCT
VKOR_r_120	GTAGACAGAACCAGCGAGAGACACCAGGGA
VKOR_r_121	CAGGTAGACAGAACCAGCGAGAGACACCAG
VKOR_r_122	GGCCAGGTAGACAGAACCAGCGAGAGACAC
VKOR_r_123	CCAGGCCAGGTAGACAGAACCAGCGAGAGA
VKOR_r_124	GATCCAGGCCAGGTAGACAGAACCAGCGAG
VKOR_r_125	CAGGATCCAGGCCAGGTAGACAGAACCAGC
VKOR_r_126	GAACAGGATCCAGGCCAGGTAGACAGAACC
VKOR_r_127	GAAGAACAGGATCCAGGCCAGGTAGACAGA
VKOR_r_128	CACGAAGAACAGGATCCAGGCCAGGTAGAC
VKOR_r_129	GAGCACGAAGAACAGGATCCAGGCCAGGTA
VKOR_r_130	ATAGAGCACGAAGAACAGGATCCAGGCCAG
VKOR_r_131	ATCATAGAGCACGAAGAACAGGATCCAGGC
VKOR_r_132	GAAATCATAGAGCACGAAGAACAGGATCCA
VKOR_r_133	GCAGAAATCATAGAGCACGAAGAACAGGAT
VKOR_r_134	AATGCAGAAATCATAGAGCACGAAGAACAG
VKOR_r_135	AACAATGCAGAAATCATAGAGCACGAAGAA
VKOR_r_136	ACAAACAATGCAGAAATCATAGAGCACGAA
VKOR_r_137	GATACAAACAATGCAGAAATCATAGAGCAC
VKOR_r_138	GGTGATACAAACAATGCAGAAATCATAGAG
VKOR_r_139	GGTGGTGATACAAACAATGCAGAAATCATA
VKOR_r_140	ATAGGTGGTGATACAAACAATGCAGAAATC
VKOR_r_141	AGCATAGGTGGTGATACAAACAATGCAGAA
VKOR_r_142	GATAGCATAGGTGGTGATACAAACAATGCA
VKOR_r_143	GTTGATAGCATAGGTGGTGATACAAACAAT
VKOR_r_144	CACGTTGATAGCATAGGTGGTGATACAAAC
VKOR_r_145	GCTCACGTTGATAGCATAGGTGGTGATACA
VKOR_r_146	CAGGCTCACGTTGATAGCATAGGTGGTGAT
VKOR_r_147	CATCAGGCTCACGTTGATAGCATAGGTGGT
VKOR_r_148	CCACATCAGGCTCACGTTGATAGCATAGGT
VKOR_r_149	GAGCCACATCAGGCTCACGTTGATAGCATA
VKOR_r_150	ACTGAGCCACATCAGGCTCACGTTGATAGC
VKOR_r_151	GAAACTGAGCCACATCAGGCTCACGTTGAT
VKOR_r_152	CCGGAAACTGAGCCACATCAGGCTCACGTT
VKOR_r_153	CTTCCGGAAACTGAGCCACATCAGGCTCAC
VKOR_r_154	GACCTTCCGGAAACTGAGCCACATCAGGCT
VKOR_r_155	TTGGACCTTCCGGAAACTGAGCCACATCAG
VKOR_r_156	TTCTTGGACCTTCCGGAAACTGAGCCACAT
VKOR_r_157	GGGTTCTTGGACCTTCCGGAAACTGAGCCA
VKOR_r_158	CTGGGGTTCTTGGACCTTCCGGAAACTGAG
VKOR_r_159	GCCCTGGGGTTCTTGGACCTTCCGGAAACT
VKOR_r_160	CTTGCCCTGGGGTTCTTGGACCTTCCGGAA
VKOR_r_161	AGCCTTGCCCTGGGGTTCTTGGACCTTCCG
VKOR_r_162	CTTAGCCTTGCCCTGGGGTTCTTGGACCTT
VKOR_r_163	CCTCTTAGCCTTGCCCTGGGGTTCTTGGAC
